# Supplementary material
Source: PubMed Central journal article supplement (PMC3486924)

$^1\text{H}$  NMR spectrum of A (400 MHz,  $\text{CD}_3\text{CN}$ )

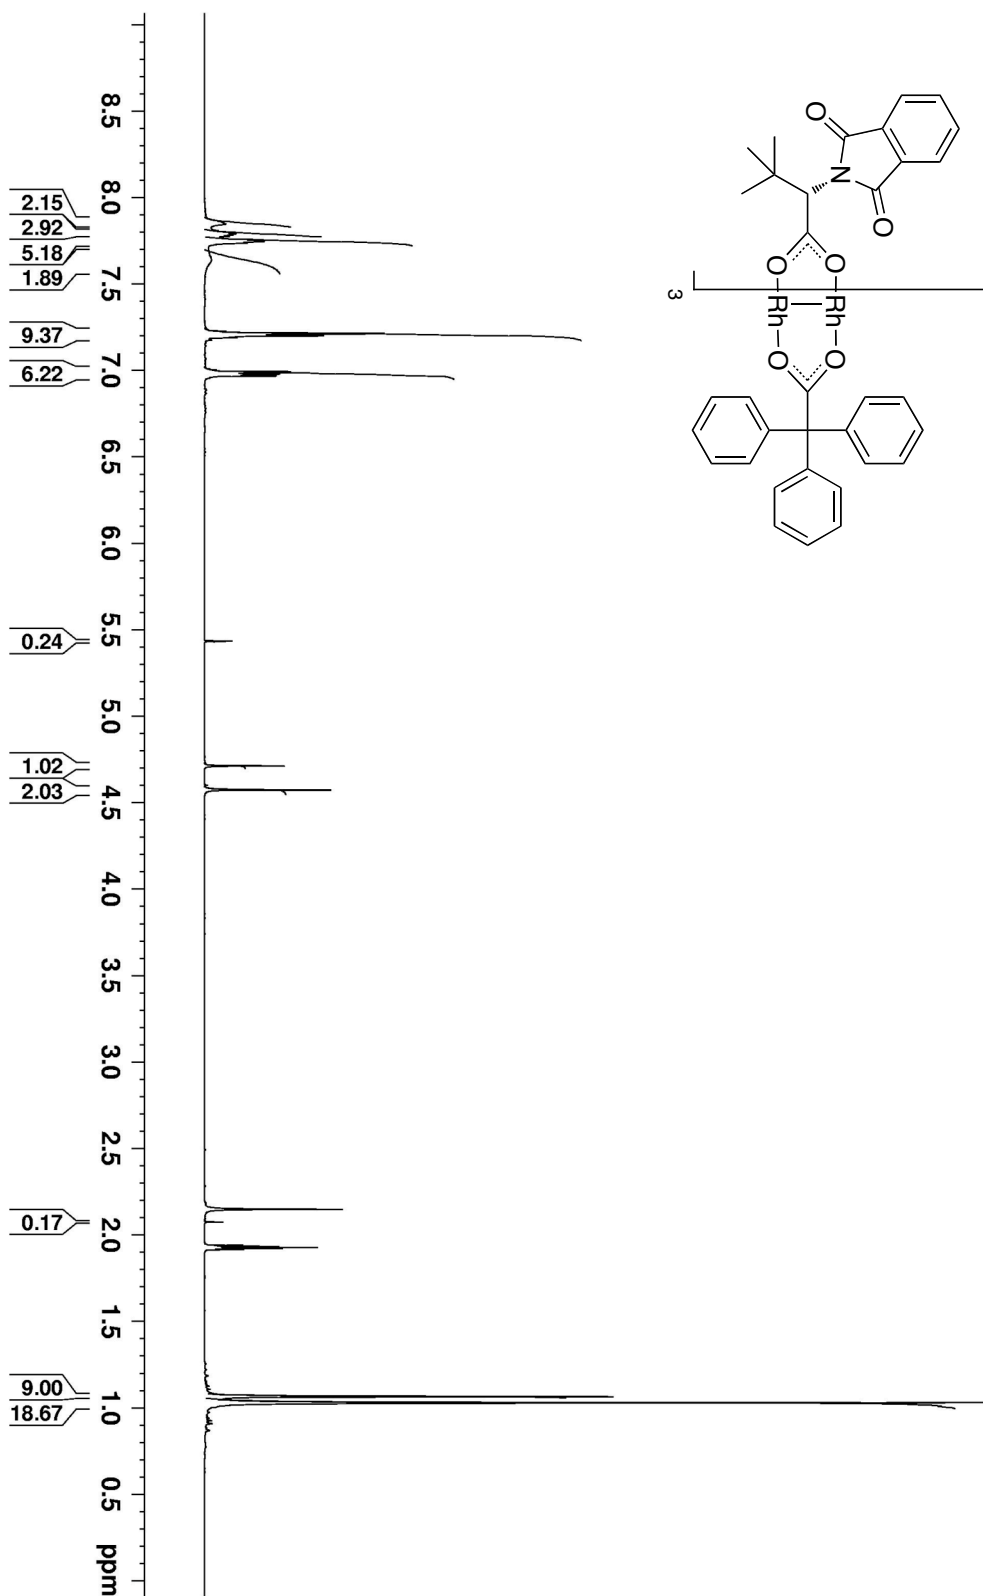

<sup>13</sup>C NMR spectrum of A (100 MHz, CD<sub>3</sub>CN)

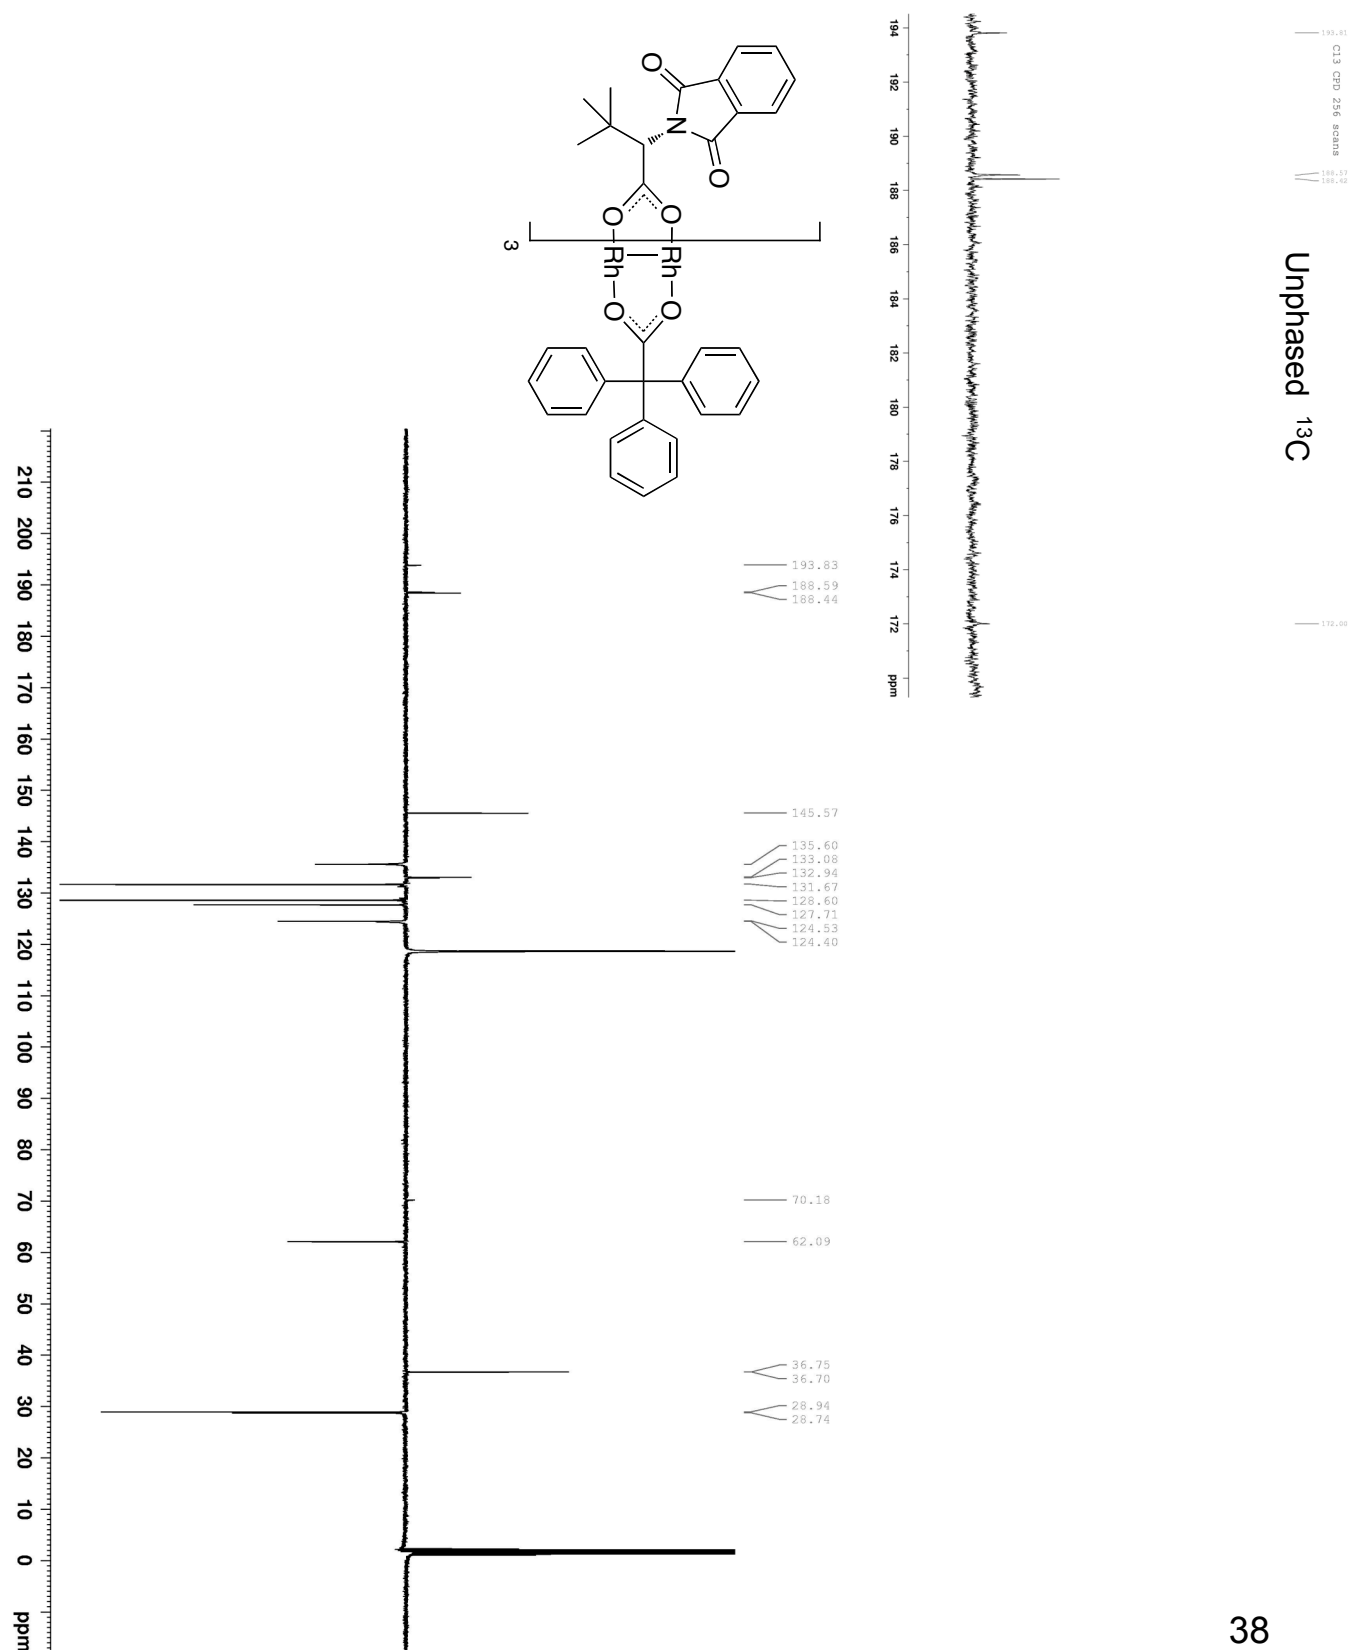

GC trace of 1 (Hewlett Packard HP5 column, 200 °C injection, 50–300 °C over 27 min)

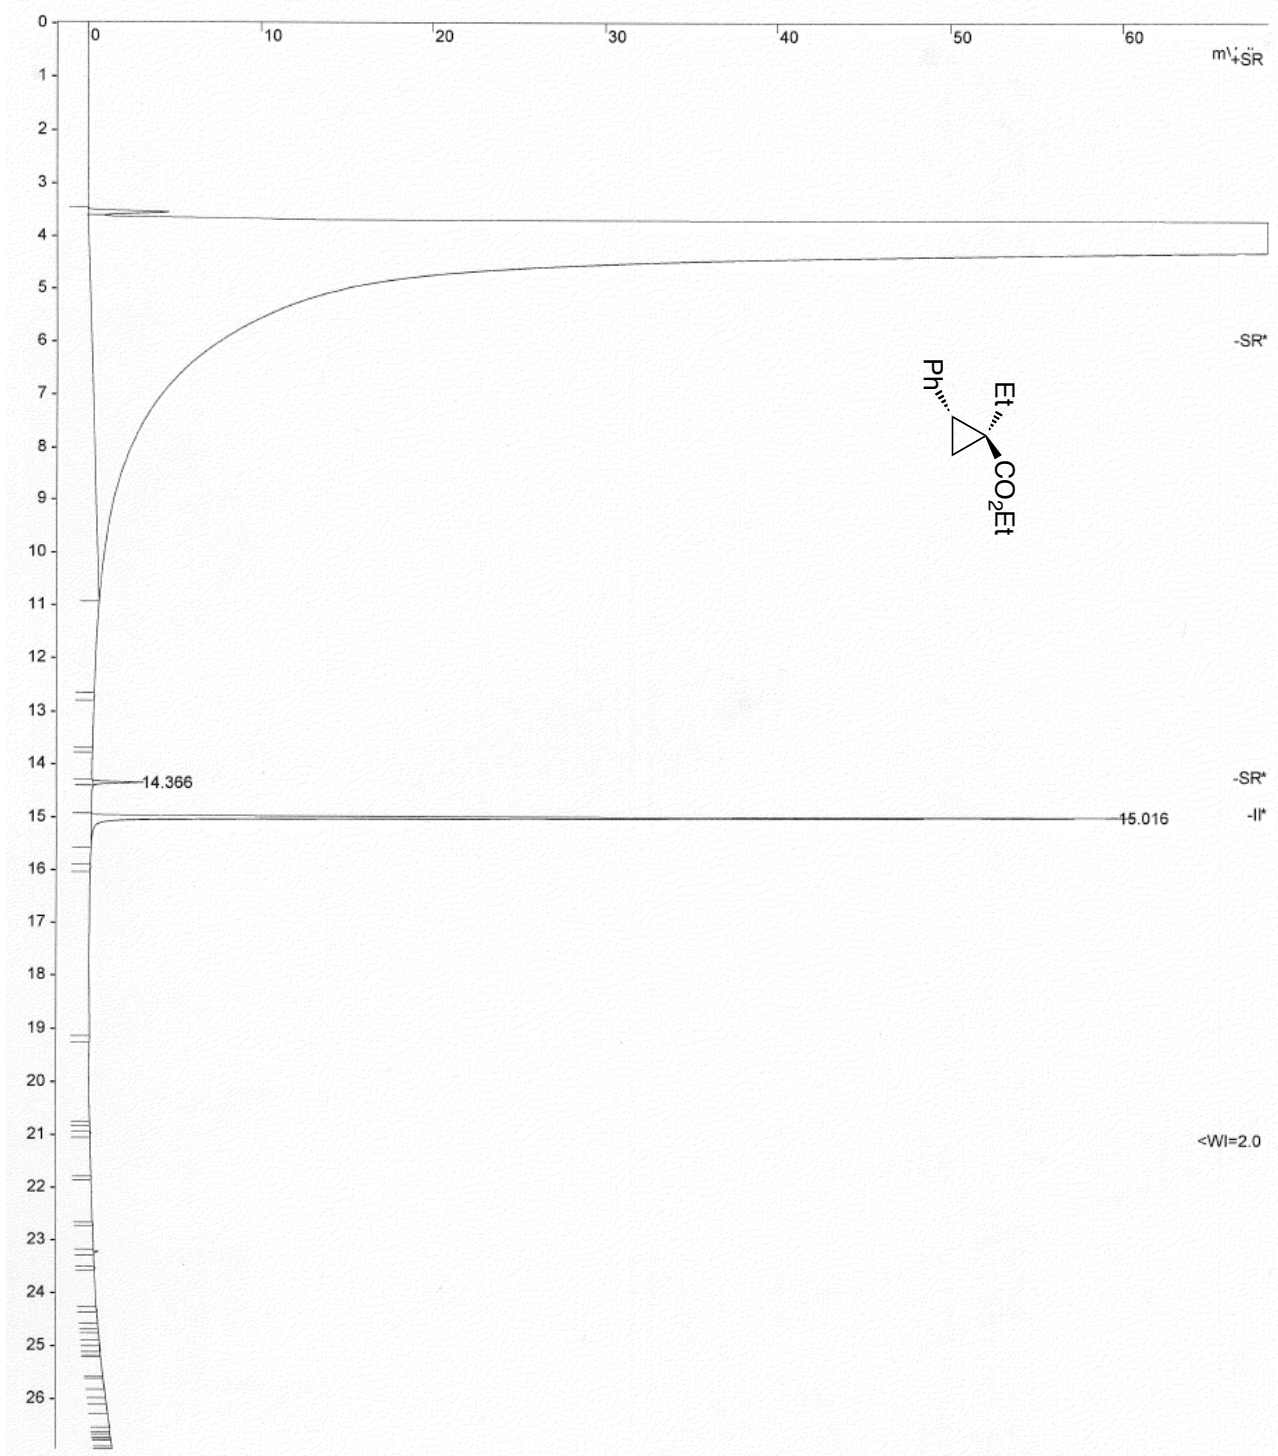

| Peak No. | Peak Name | Result ( ) | Ret. Time (min) | Time Offset (min) | Area (counts) | Sep. Code | Width 1/2 (sec) | Status Codes |
|----------|-----------|------------|-----------------|-------------------|---------------|-----------|-----------------|--------------|
| 1        |           | 4.2881     | 14.366          | 0.000             | 6865          | BB        | 2.2             |              |
| 2        |           | 95.7119    | 15.016          | 0.000             | 153238        | BB        | 2.2             |              |
| Totals:  |           | 100.0000   |                 | 0.000             | 160103        |           |                 |              |

Racemic 1 (Chiracel IB column, 99.9:0.1 hexanes:isopropanol, 1 mL/min, 220nm)

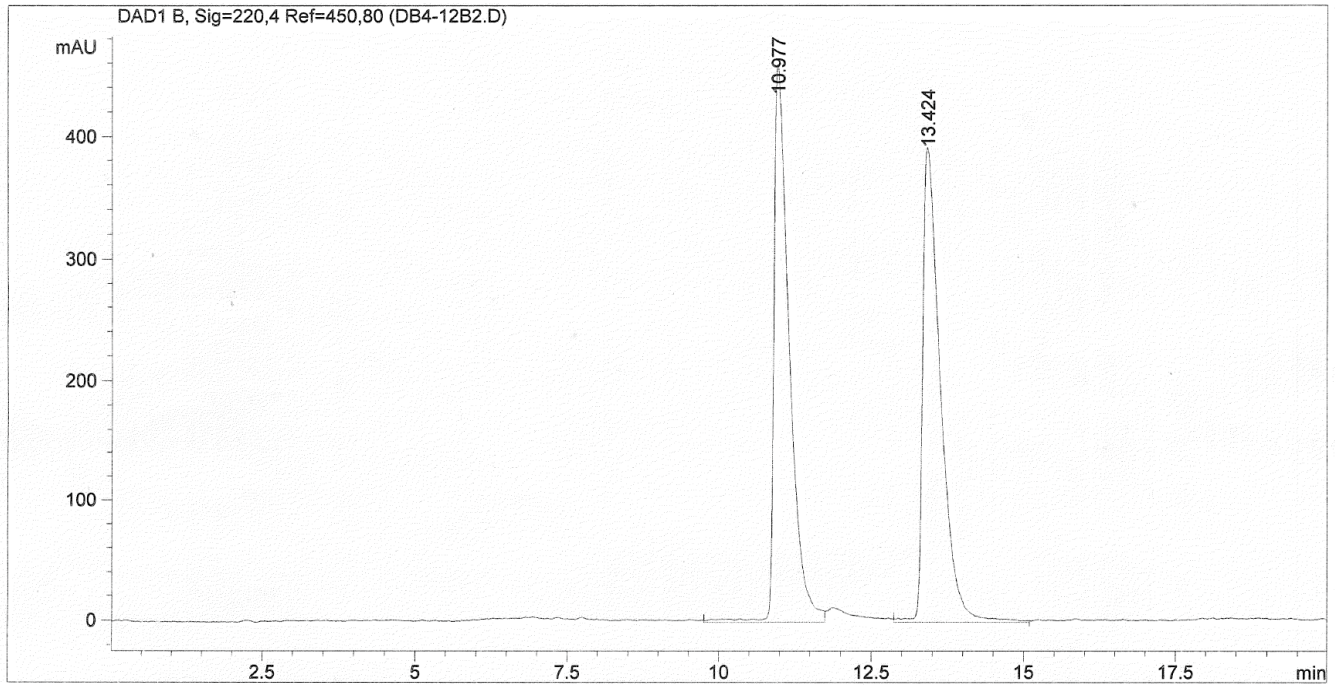

=====  
Area Percent Report  
=====

Sorted By : Signal  
Multiplier : 1.0000  
Dilution : 1.0000  
Use Multiplier & Dilution Factor with ISTDs

Signal 1: DAD1 B, Sig=220,4 Ref=450,80

| Peak # | RetTime [min] | Type | Width [min] | Area [mAU*s] | Height [mAU] | Area %  |
|--------|---------------|------|-------------|--------------|--------------|---------|
| 1      | 10.977        | VV   | 0.2657      | 8153.20752   | 457.04047    | 50.3719 |
| 2      | 13.424        | VB   | 0.3053      | 8032.83008   | 388.40359    | 49.6281 |



Enantiomeric excess of **1** (Chiracel IB column, 99.9:0.1 hexanes:isopropanol, 1 mL/min, 220nm)

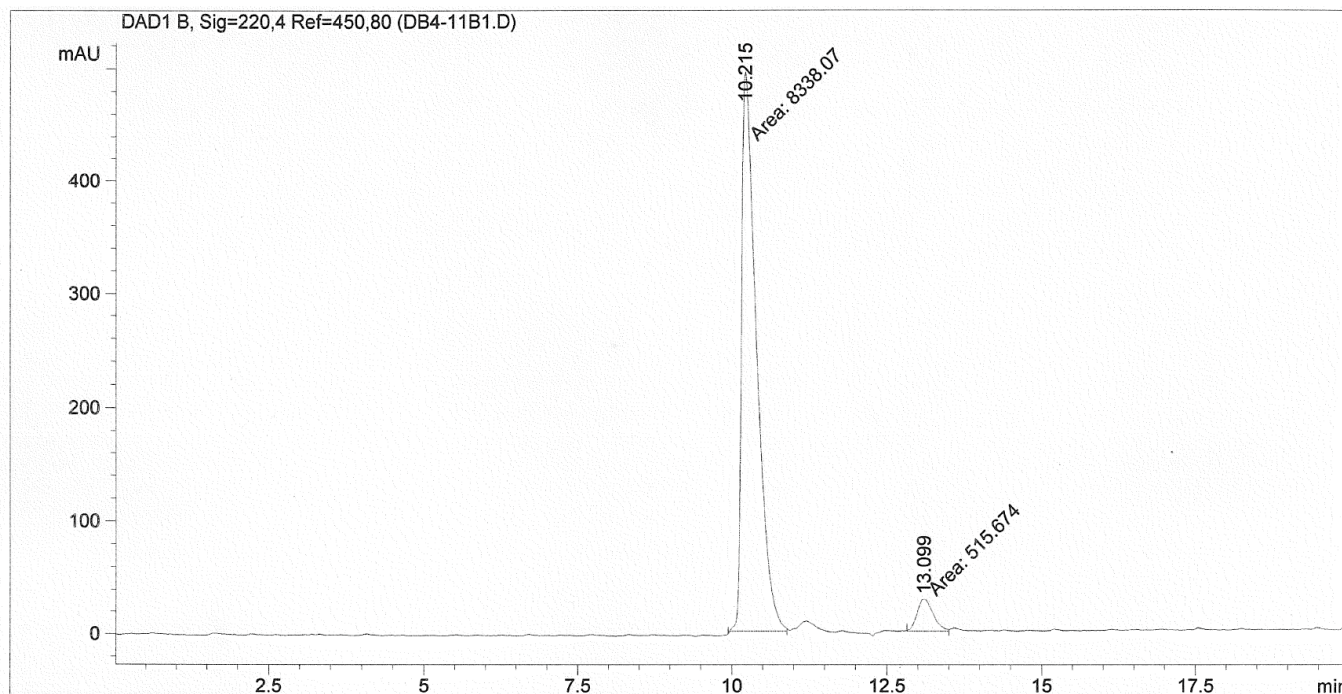

=====  
Area Percent Report  
=====

Sorted By : Signal  
Multiplier : 1.0000  
Dilution : 1.0000  
Use Multiplier & Dilution Factor with ISTDs

Signal 1: DAD1 B, Sig=220,4 Ref=450,80

| Peak # | RetTime [min] | Type | Width [min] | Area [mAU*s] | Height [mAU] | Area %  |
|--------|---------------|------|-------------|--------------|--------------|---------|
| 1      | 10.215        | MM   | 0.2808      | 8338.07227   | 494.97476    | 94.1756 |
| 2      | 13.099        | MM   | 0.2966      | 515.67365    | 28.98072     | 5.8244  |

<sup>1</sup>H NMR spectrum of **2** (400 MHz, CDCl<sub>3</sub>)

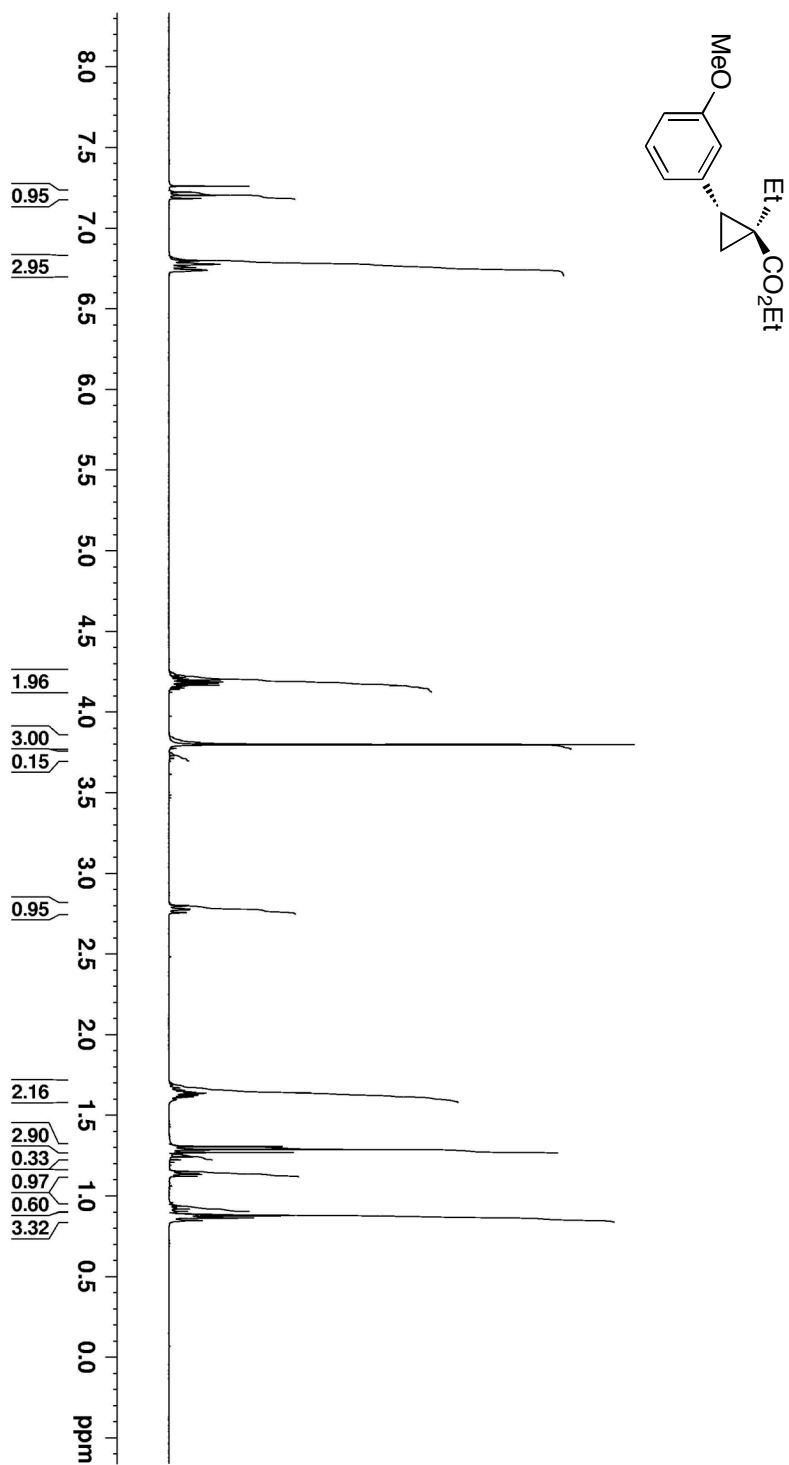

$^{13}\text{C}$  NMR spectrum of **2** (100 MHz,  $\text{CDCl}_3$ )

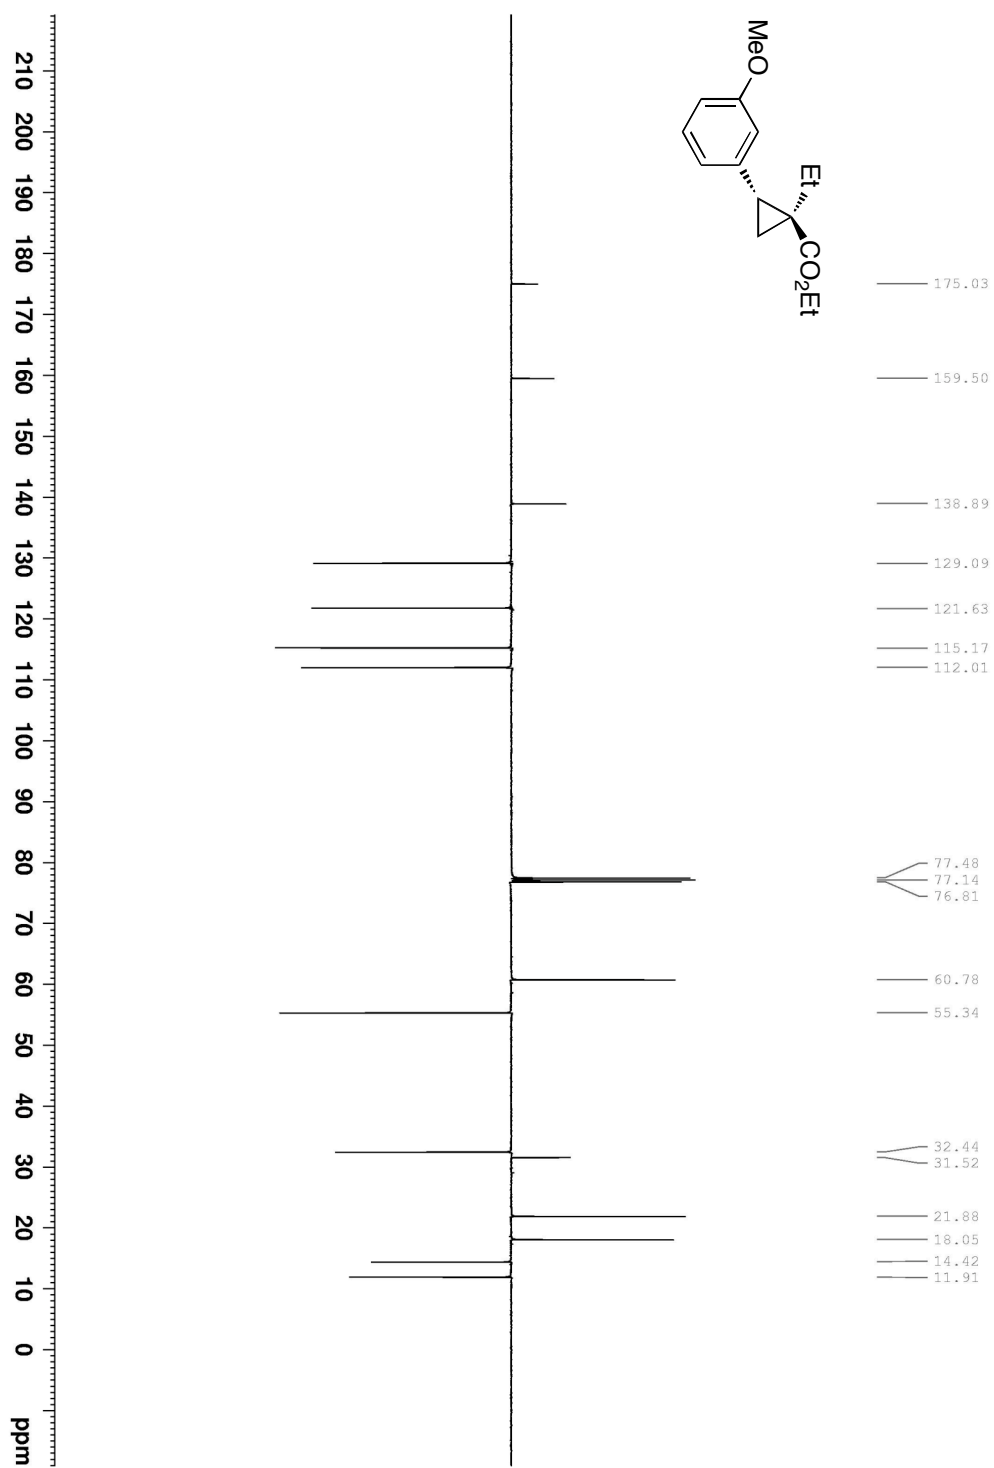

GC trace of 2 (Hewlett Packard HP1 column, 200 °C injection, 50–300 °C over 27 min)

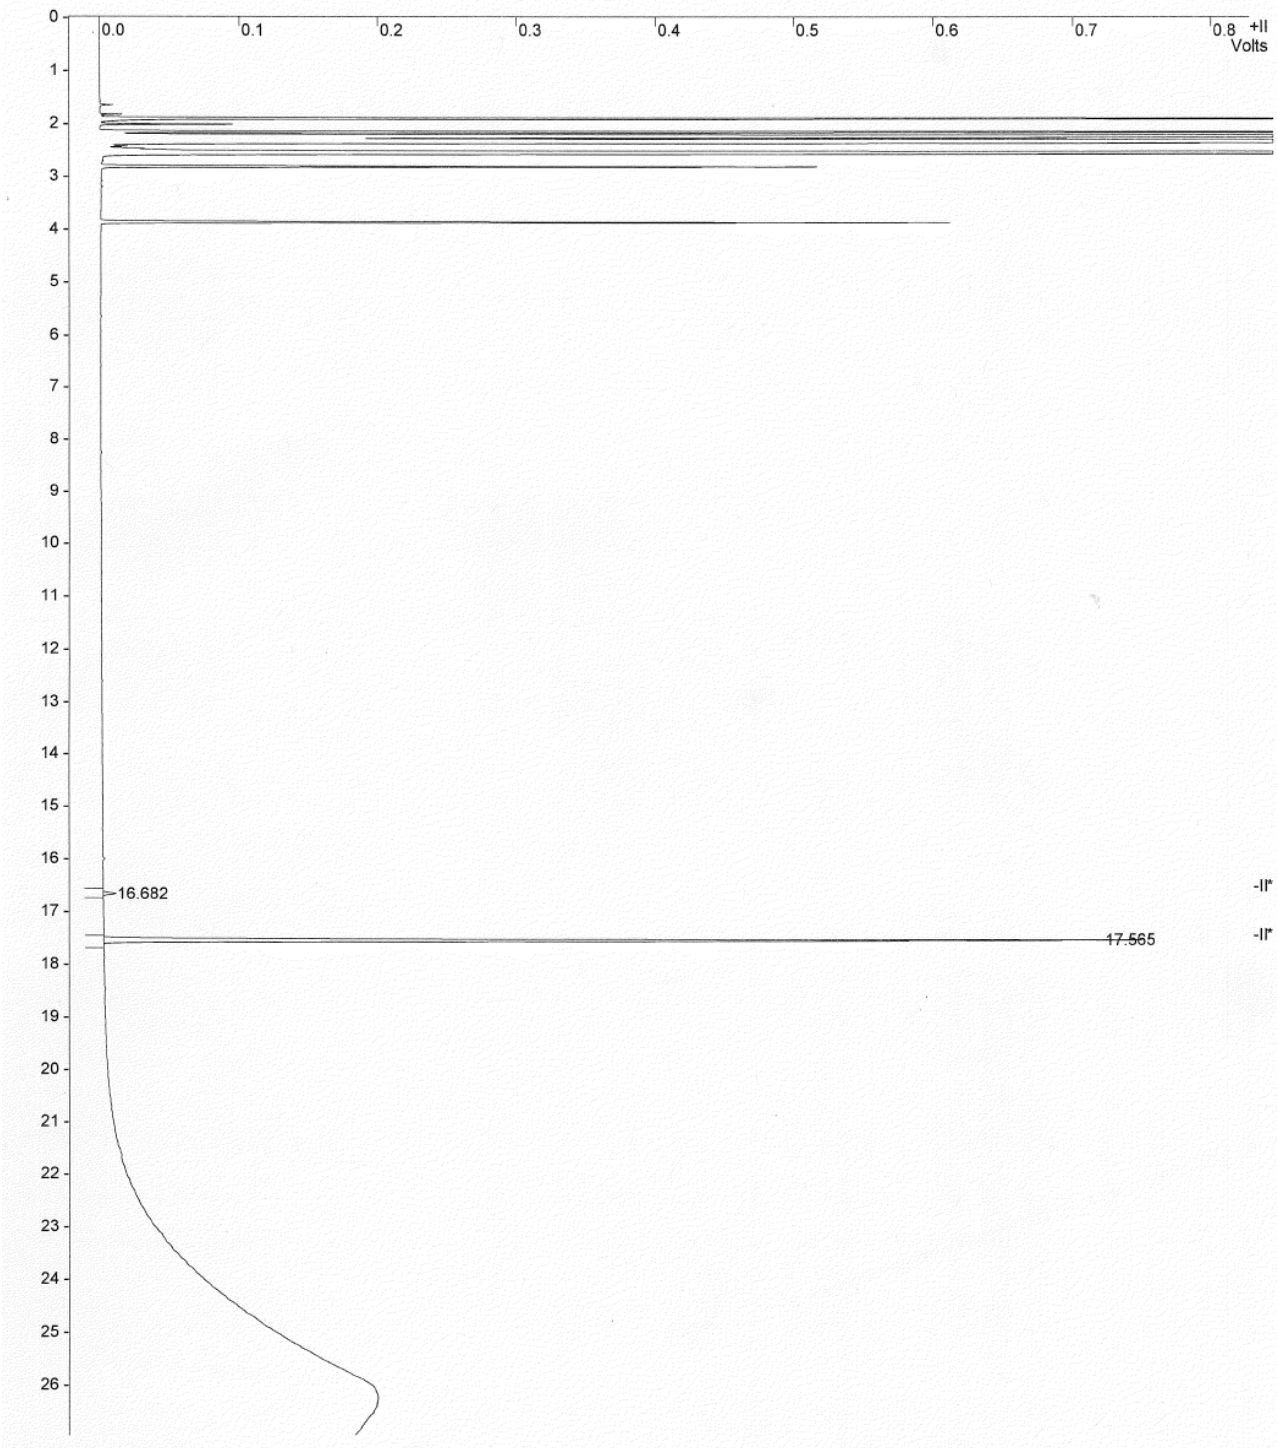

| Peak No. | Peak Name | Result ( ) | Ret. Time (min) | Time Offset (min) | Area (counts) | Sep. Code | Width 1/2 (sec) | Status Codes |
|----------|-----------|------------|-----------------|-------------------|---------------|-----------|-----------------|--------------|
| 1        |           | 1.3279     | 16.682          | 0.000             | 27307         | BB        | 2.7             |              |
| 2        |           | 98.6721    | 17.565          | 0.000             | 2029158       | BB        | 2.5             |              |
| Totals:  |           | 100.0000   |                 | 0.000             | 2056465       |           |                 |              |

HPLC resolution of racemic **2** (Chiracel OJ-H column, 99.9:0.1-90:10  
 hexanes:isopropanol over 120 min., 1 mL/min, 230 nm)

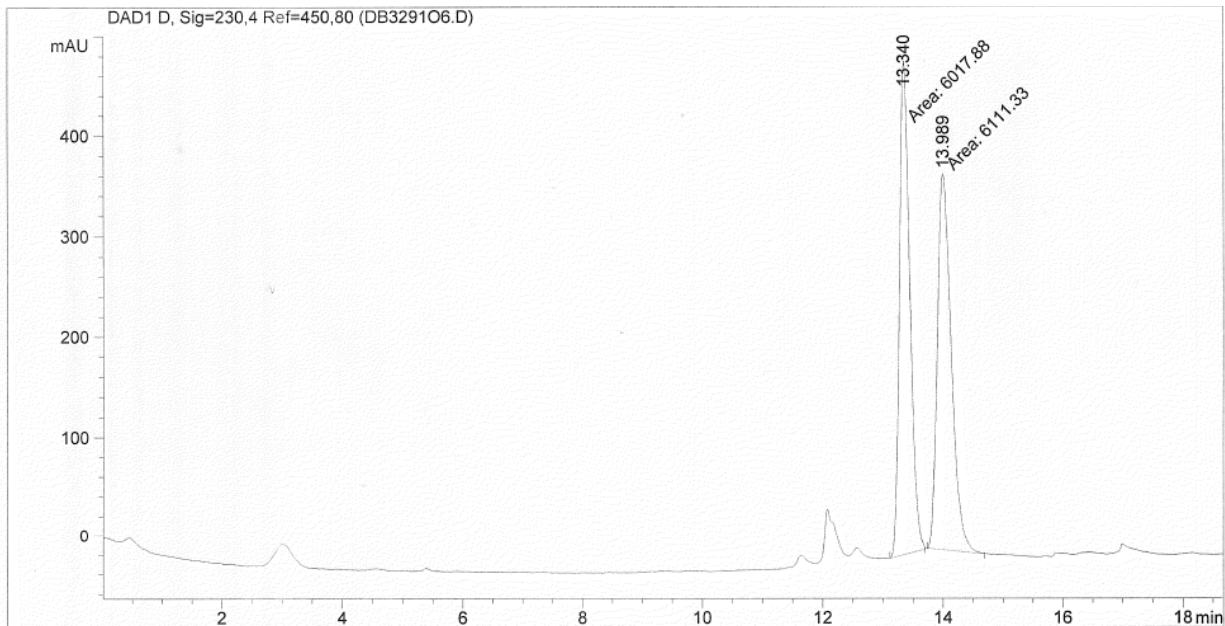

=====  
 Area Percent Report  
 =====

Sorted By : Signal  
 Multiplier : 1.0000  
 Dilution : 1.0000  
 Use Multiplier & Dilution Factor with ISTDs

Signal 1: DAD1 D, Sig=230,4 Ref=450,80

| Peak # | RetTime [min] | Type | Width [min] | Area [mAU*s] | Height [mAU] | Area %  |
|--------|---------------|------|-------------|--------------|--------------|---------|
| 1      | 13.340        | MM   | 0.2022      | 6017.88184   | 496.11420    | 49.6148 |
| 2      | 13.989        | MM   | 0.2701      | 6111.32715   | 377.05579    | 50.3852 |



Enantiomeric excess of **2** (Chiracel OJ-H column, 99.9:0.1-90:10  
 hexanes:isopropanol over 120 min., 1 mL/min, 230 nm)

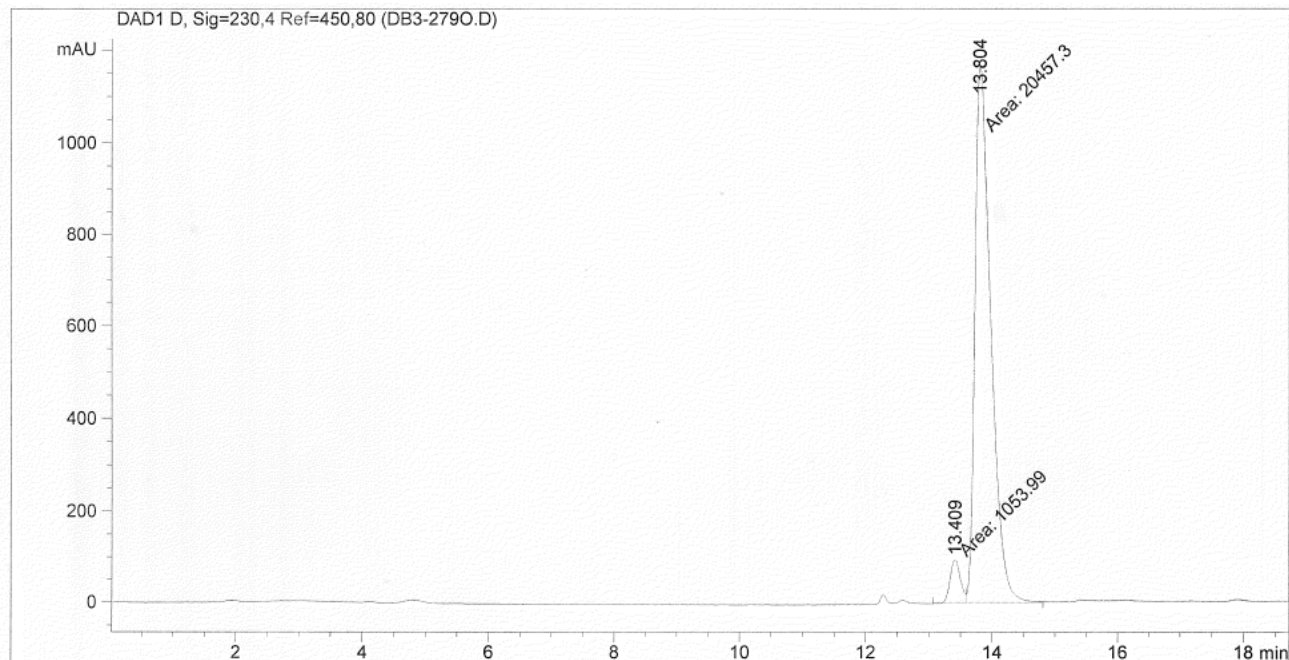

=====  
 Area Percent Report  
 =====

Sorted By : Signal  
 Multiplier : 1.0000  
 Dilution : 1.0000  
 Use Multiplier & Dilution Factor with ISTDs

Signal 1: DAD1 D, Sig=230,4 Ref=450,80

| Peak # | RetTime [min] | Type | Width [min] | Area [mAU*s] | Height [mAU] | Area %  |
|--------|---------------|------|-------------|--------------|--------------|---------|
| 1      | 13.409        | MF   | 0.1868      | 1053.99170   | 94.05535     | 4.8997  |
| 2      | 13.804        | FM   | 0.2919      | 2.04573e4    | 1167.98035   | 95.1003 |



$^1\text{H}$  NMR spectrum of **3** (400 MHz,  $\text{CDCl}_3$ )

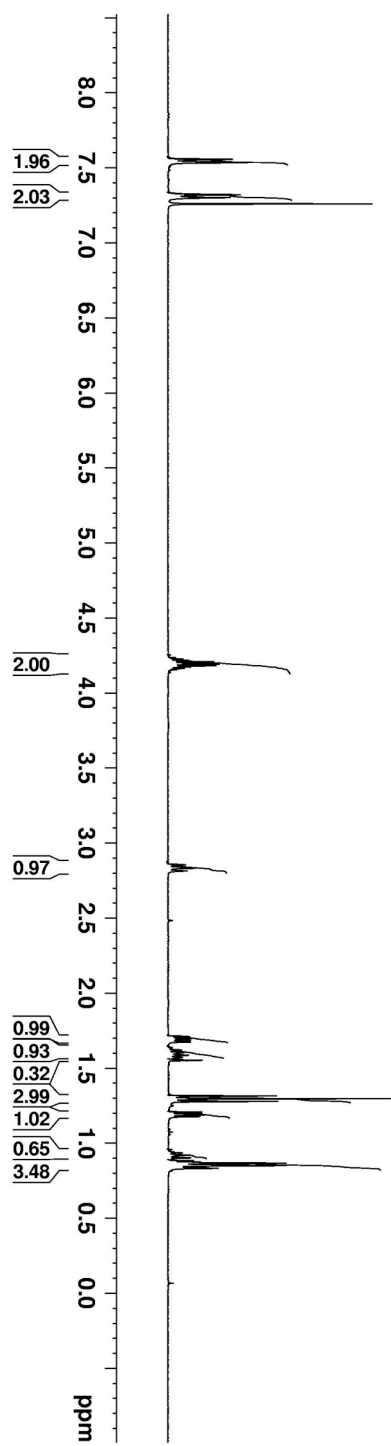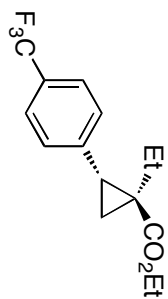

$^{13}\text{C}$  NMR spectrum of **3** (100 MHz,  $\text{CDCl}_3$ )

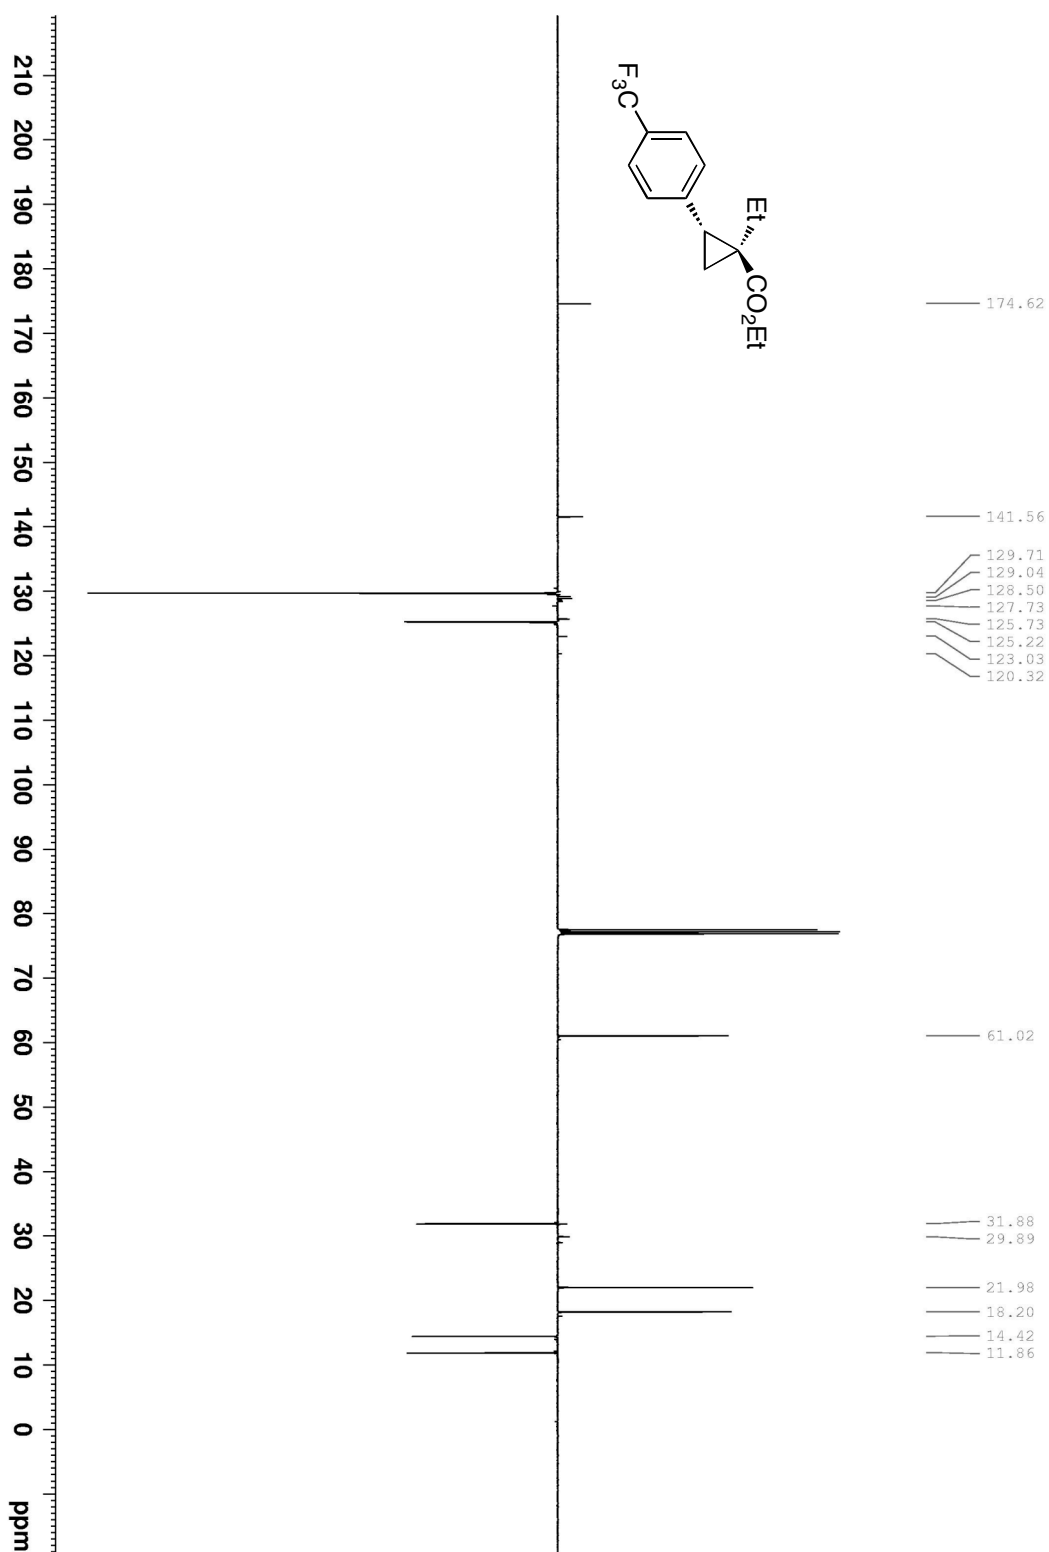

GC trace of 3 (Hewlett Packard HP1 column, 200 °C injection, 50–300 °C over 27 min)

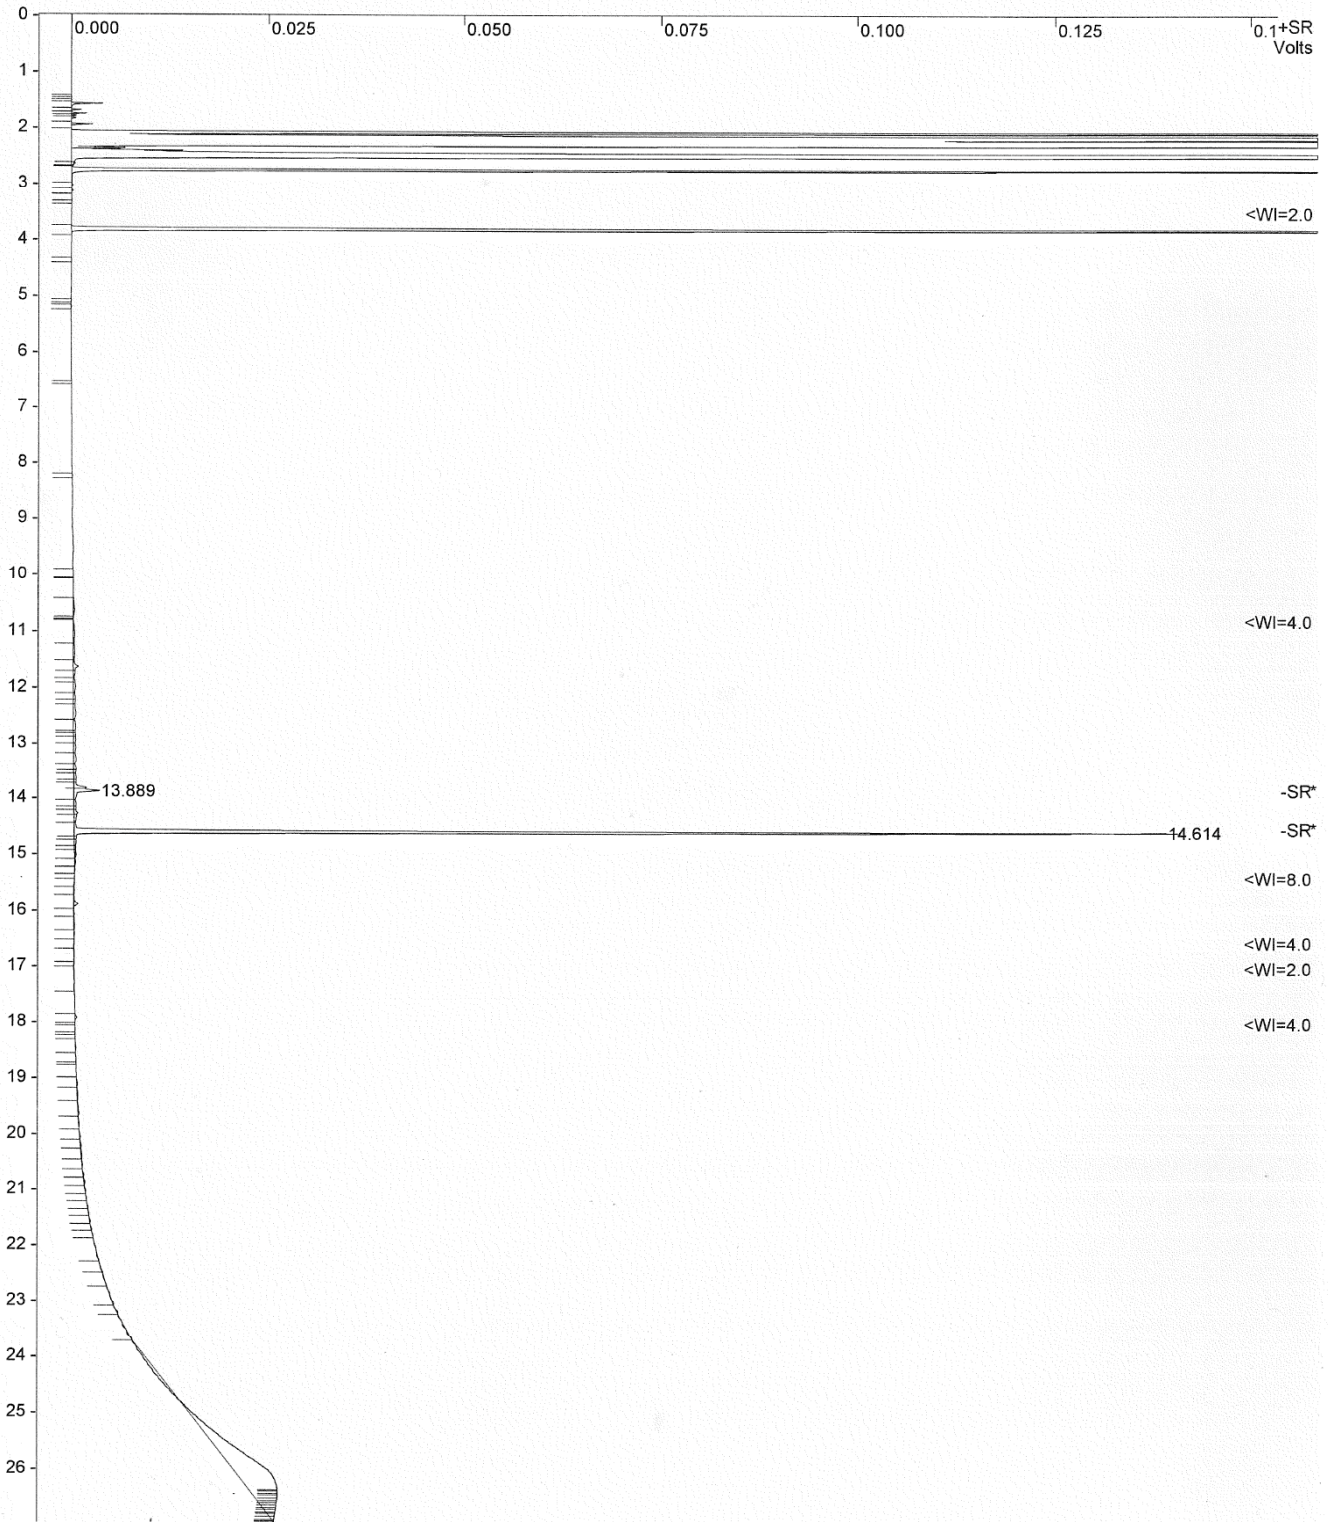

| Peak No. | Peak Name | Result ( ) | Ret. Time (min) | Time Offset (min) | Area (counts) | Sep. Code | Width 1/2 (sec) | Status Codes |
|----------|-----------|------------|-----------------|-------------------|---------------|-----------|-----------------|--------------|
| 1        |           | 3.2369     | 13.889          | 0.000             | 11094         | VV        | 2.8             |              |
| 2        |           | 96.7631    | 14.614          | 0.000             | 331638        | VB        | 2.2             |              |
| Totals:  |           | 100.0000   |                 | 0.000             | 342732        |           |                 |              |

HPLC resolution of racemic **3** (Chiracel OF column, 99.9:0.1 hexanes:isopropanol, 1 mL/min, 220 nm)

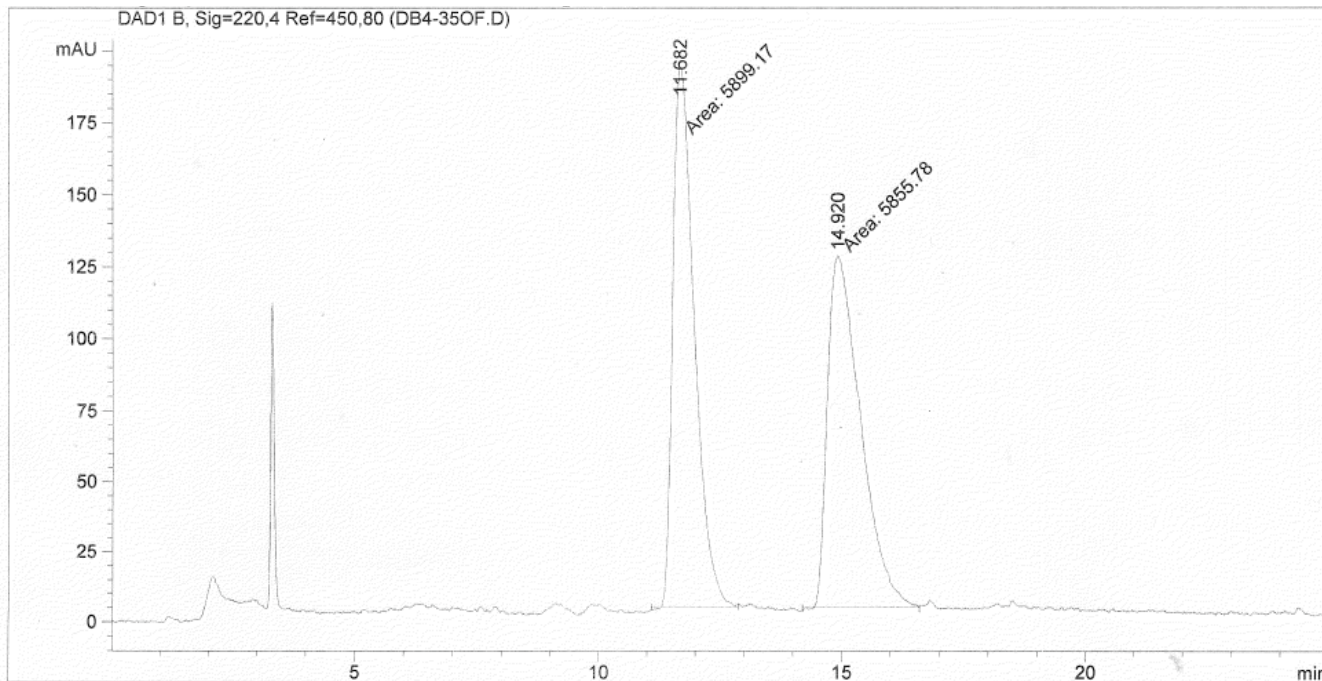

=====  
 Area Percent Report  
 =====

Sorted By : Signal  
 Multiplier : 1.0000  
 Dilution : 1.0000  
 Use Multiplier & Dilution Factor with ISTDs

Signal 1: DAD1 B, Sig=220,4 Ref=450,80

| Peak # | RetTime [min] | Type | Width [min] | Area [mAU*s] | Height [mAU] | Area %  |
|--------|---------------|------|-------------|--------------|--------------|---------|
| 1      | 11.682        | MM   | 0.5189      | 5899.17432   | 189.46356    | 50.1846 |
| 2      | 14.920        | MM   | 0.7882      | 5855.78027   | 123.81608    | 49.8154 |



Enantiomeric excess of **3** (Chiracel OF column, 99.9:0.1 hexanes:isopropanol, 1 mL/min, 220nm)

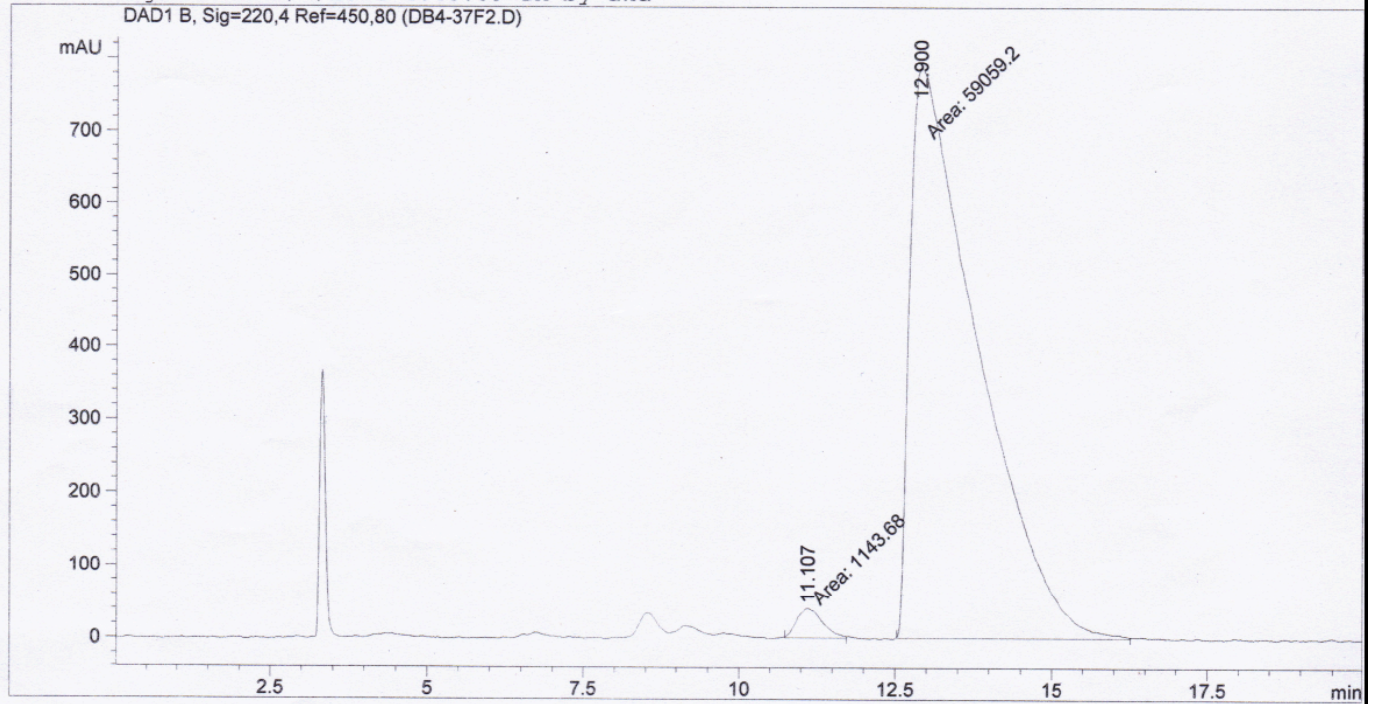

=====  
 Area Percent Report  
 =====

Sorted By : Signal  
 Multiplier : 1.0000  
 Dilution : 1.0000  
 Use Multiplier & Dilution Factor with ISTDs

Signal 1: DAD1 B, Sig=220,4 Ref=450,80

| Peak # | RetTime [min] | Type | Width [min] | Area [mAU*s] | Height [mAU] | Area %  |
|--------|---------------|------|-------------|--------------|--------------|---------|
| 1      | 11.107        | MM   | 0.4773      | 1143.68164   | 39.93412     | 1.8997  |
| 2      | 12.900        | MM   | 1.2516      | 5.90592e4    | 786.45551    | 98.1003 |

GC trace of **4** (Hewlett Packard HP1 column, 200 °C injection, 50–300 °C over 27 min)

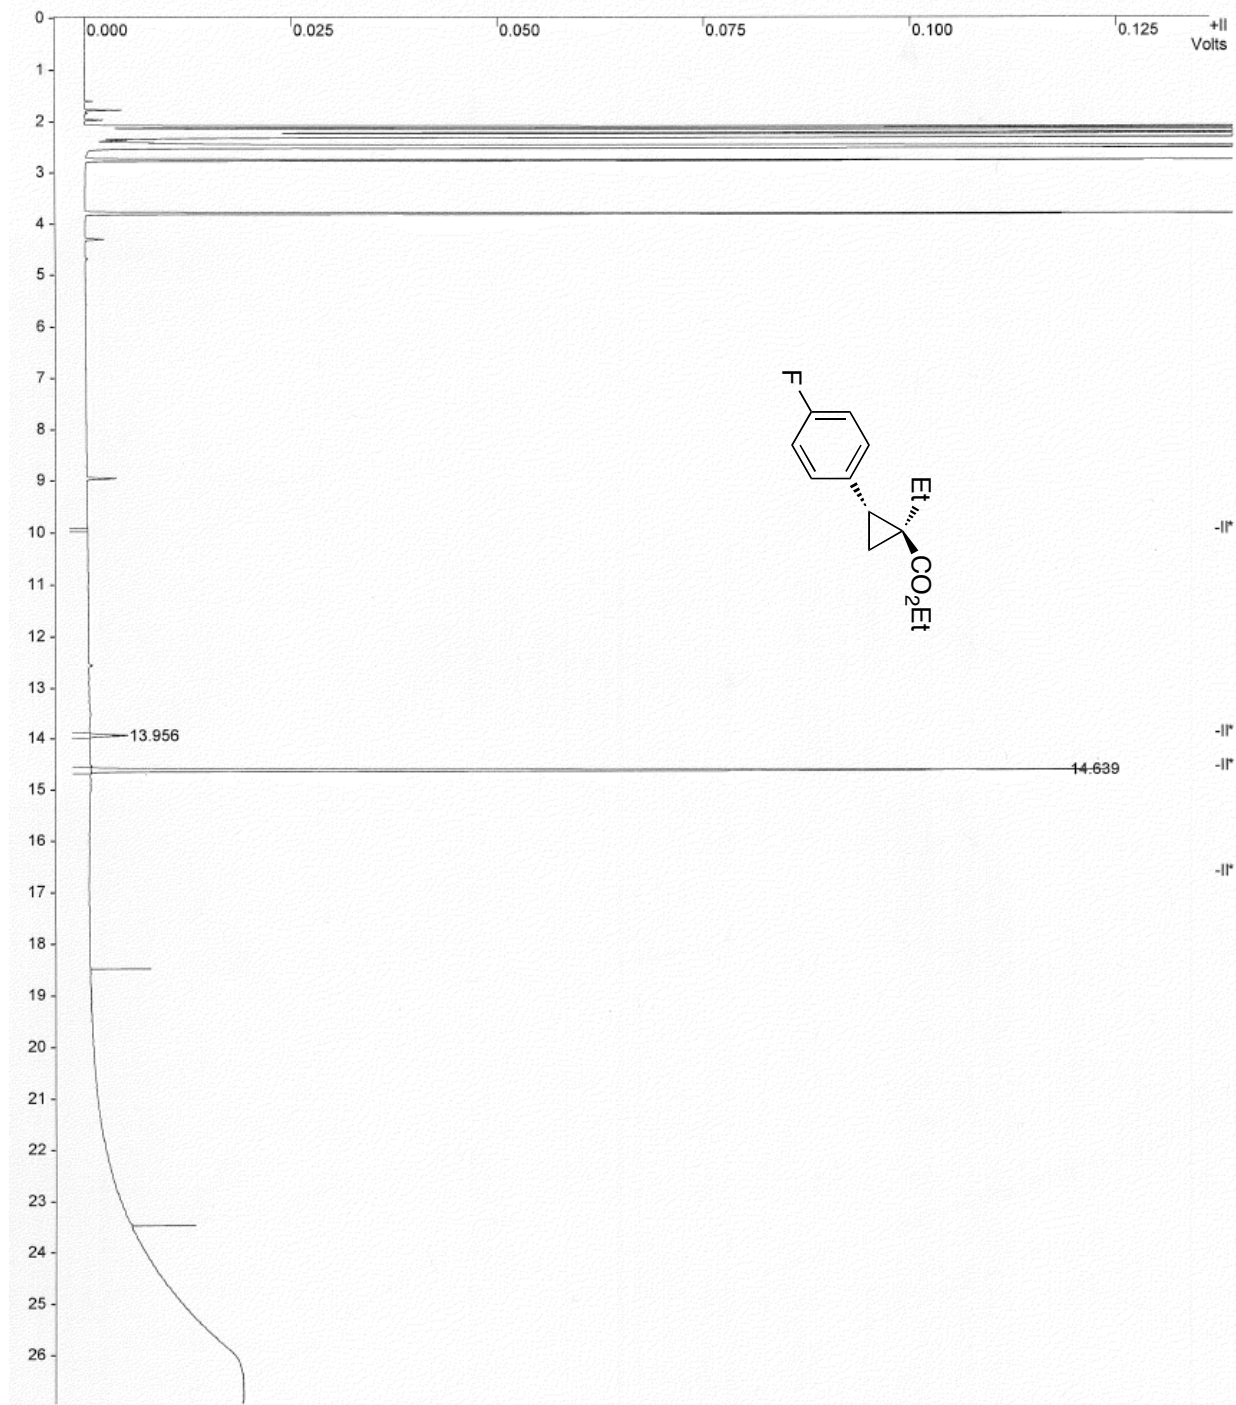

| Peak No. | Peak Name | Result (%) | Ret. Time (min) | Time Offset (min) | Area (counts) | Sep. Code | Width 1/2 (sec) | Status Codes |
|----------|-----------|------------|-----------------|-------------------|---------------|-----------|-----------------|--------------|
| 1        |           | 3.4832     | 13.956          | 0.000             | 10384         | BB        | 2.1             |              |
| 2        |           | 96.5168    | 14.639          | 0.000             | 287717        | BB        | 2.2             |              |
| Totals:  |           | 100.0000   |                 | 0.000             | 298101        |           |                 |              |



$^1\text{H}$  NMR spectrum of **4a** (400 MHz,  $\text{CDCl}_3$ )

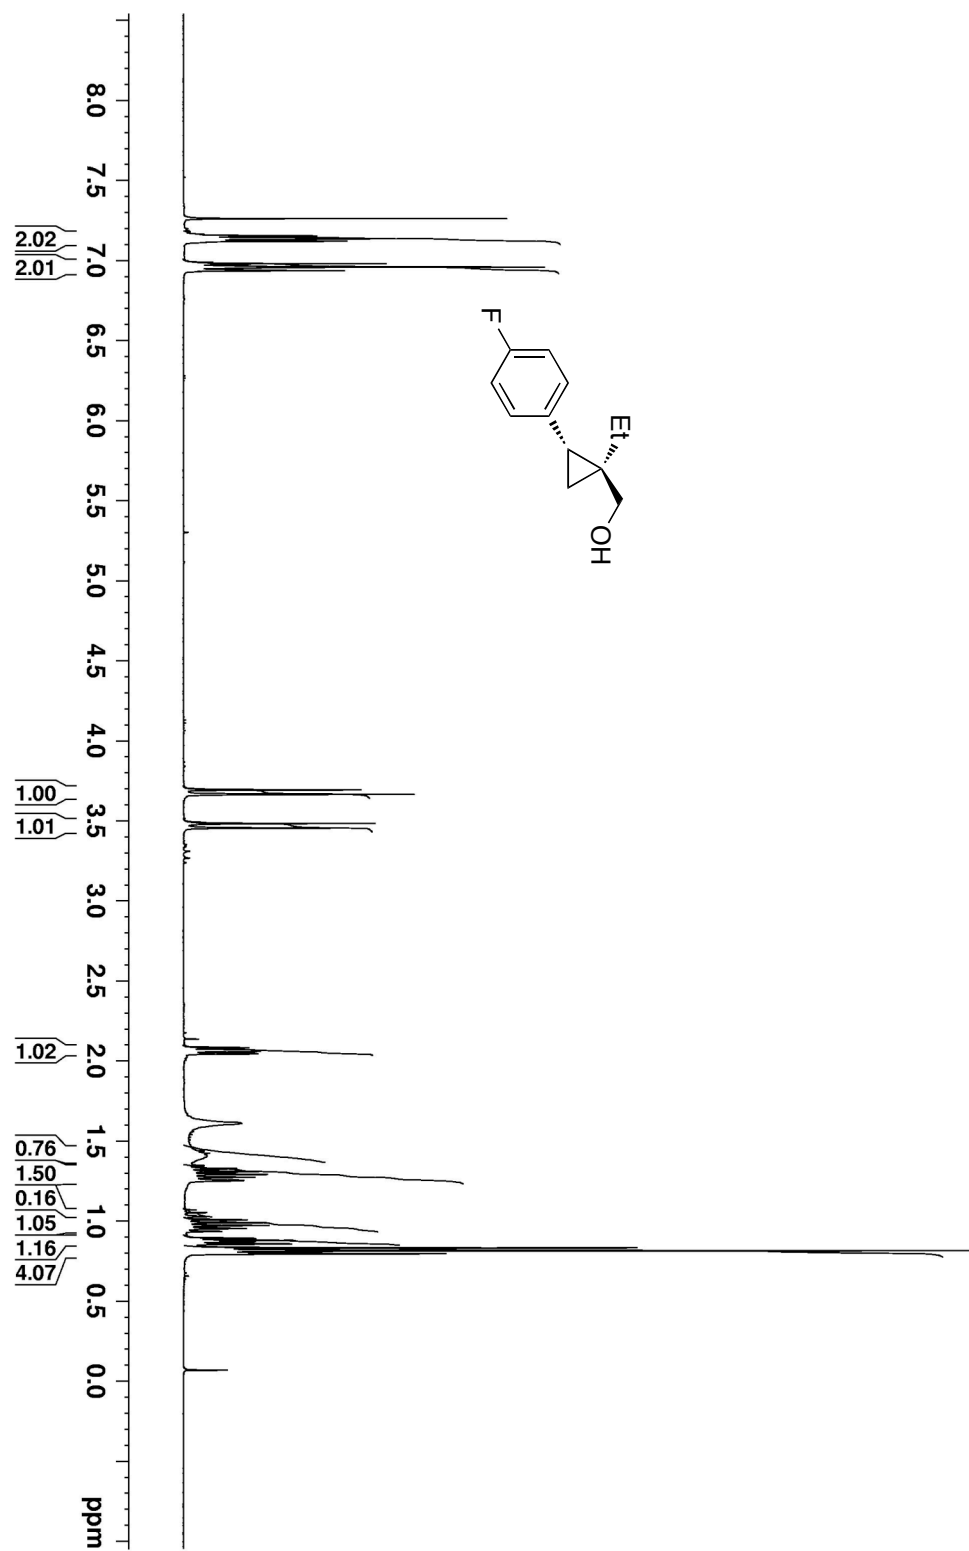

$^{13}\text{C}$  NMR spectrum of **4a** (100 MHz,  $\text{CDCl}_3$ )

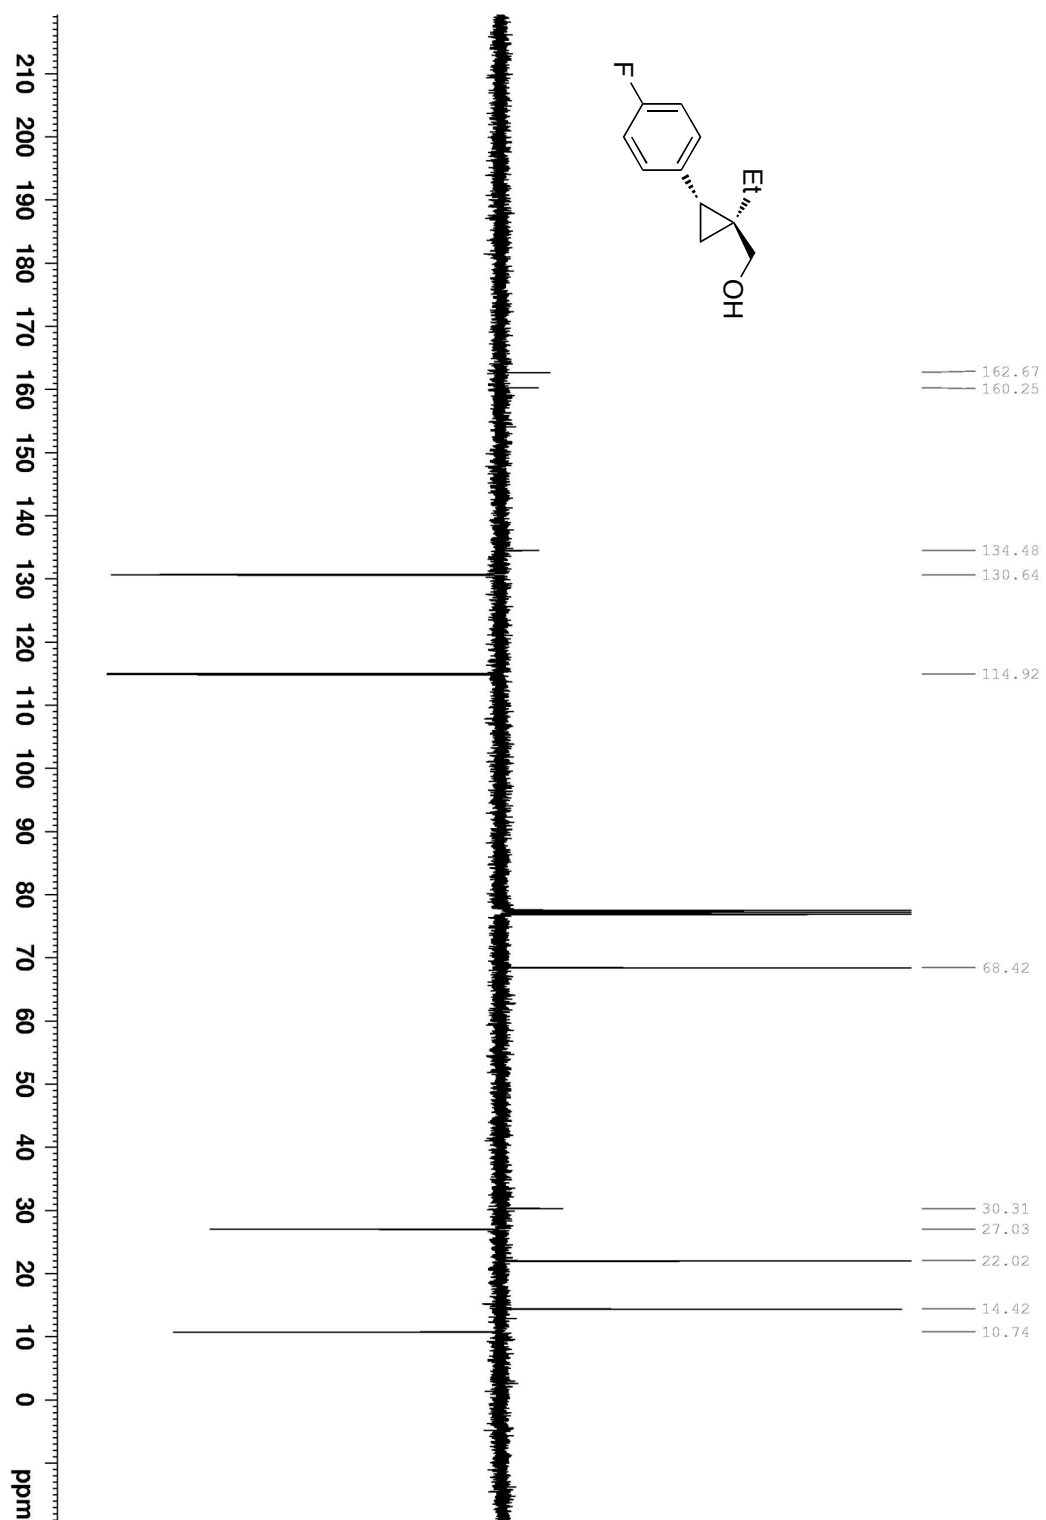

Chiral GC resolution of racemic **4a** (Chiraldex G-TA column, 200 °C injection, 50–180 °C over 135 min )

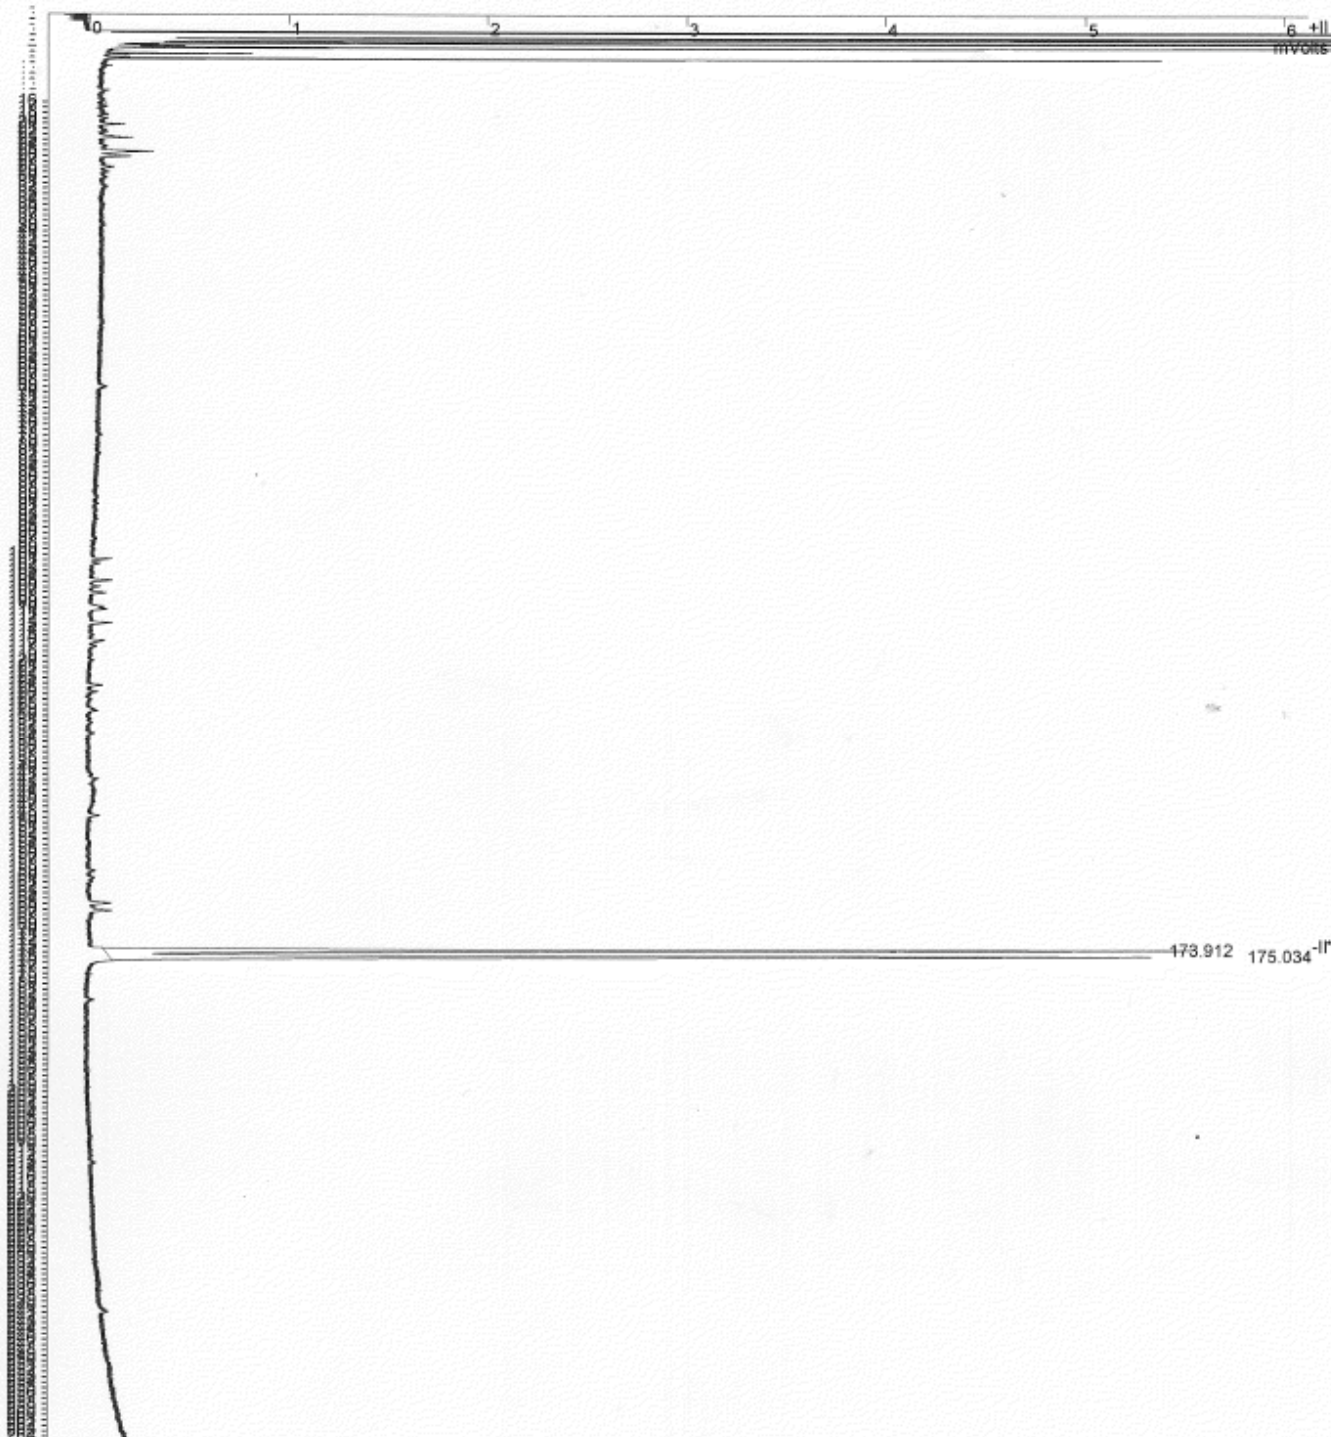

| Peak No. | Peak Name | Result ( ) | Ret. Time (min) | Time Offset (min) | Area (counts) | Sep. Code | Width 1/2 (sec) | Status Codes |
|----------|-----------|------------|-----------------|-------------------|---------------|-----------|-----------------|--------------|
| 1        |           | 49.6322    | 173.912         | 0.000             | 147106        | BV        | 24.7            |              |
| 2        |           | 50.3678    | 175.034         | 0.000             | 149286        | VB        | 26.4            |              |
| Totals:  |           | 100.0000   |                 | 0.000             | 296392        |           |                 |              |

Enantiomeric excess of **4a** (Chiraldex G-TA column, 200 °C injection, 50–180 °C over 135 min )

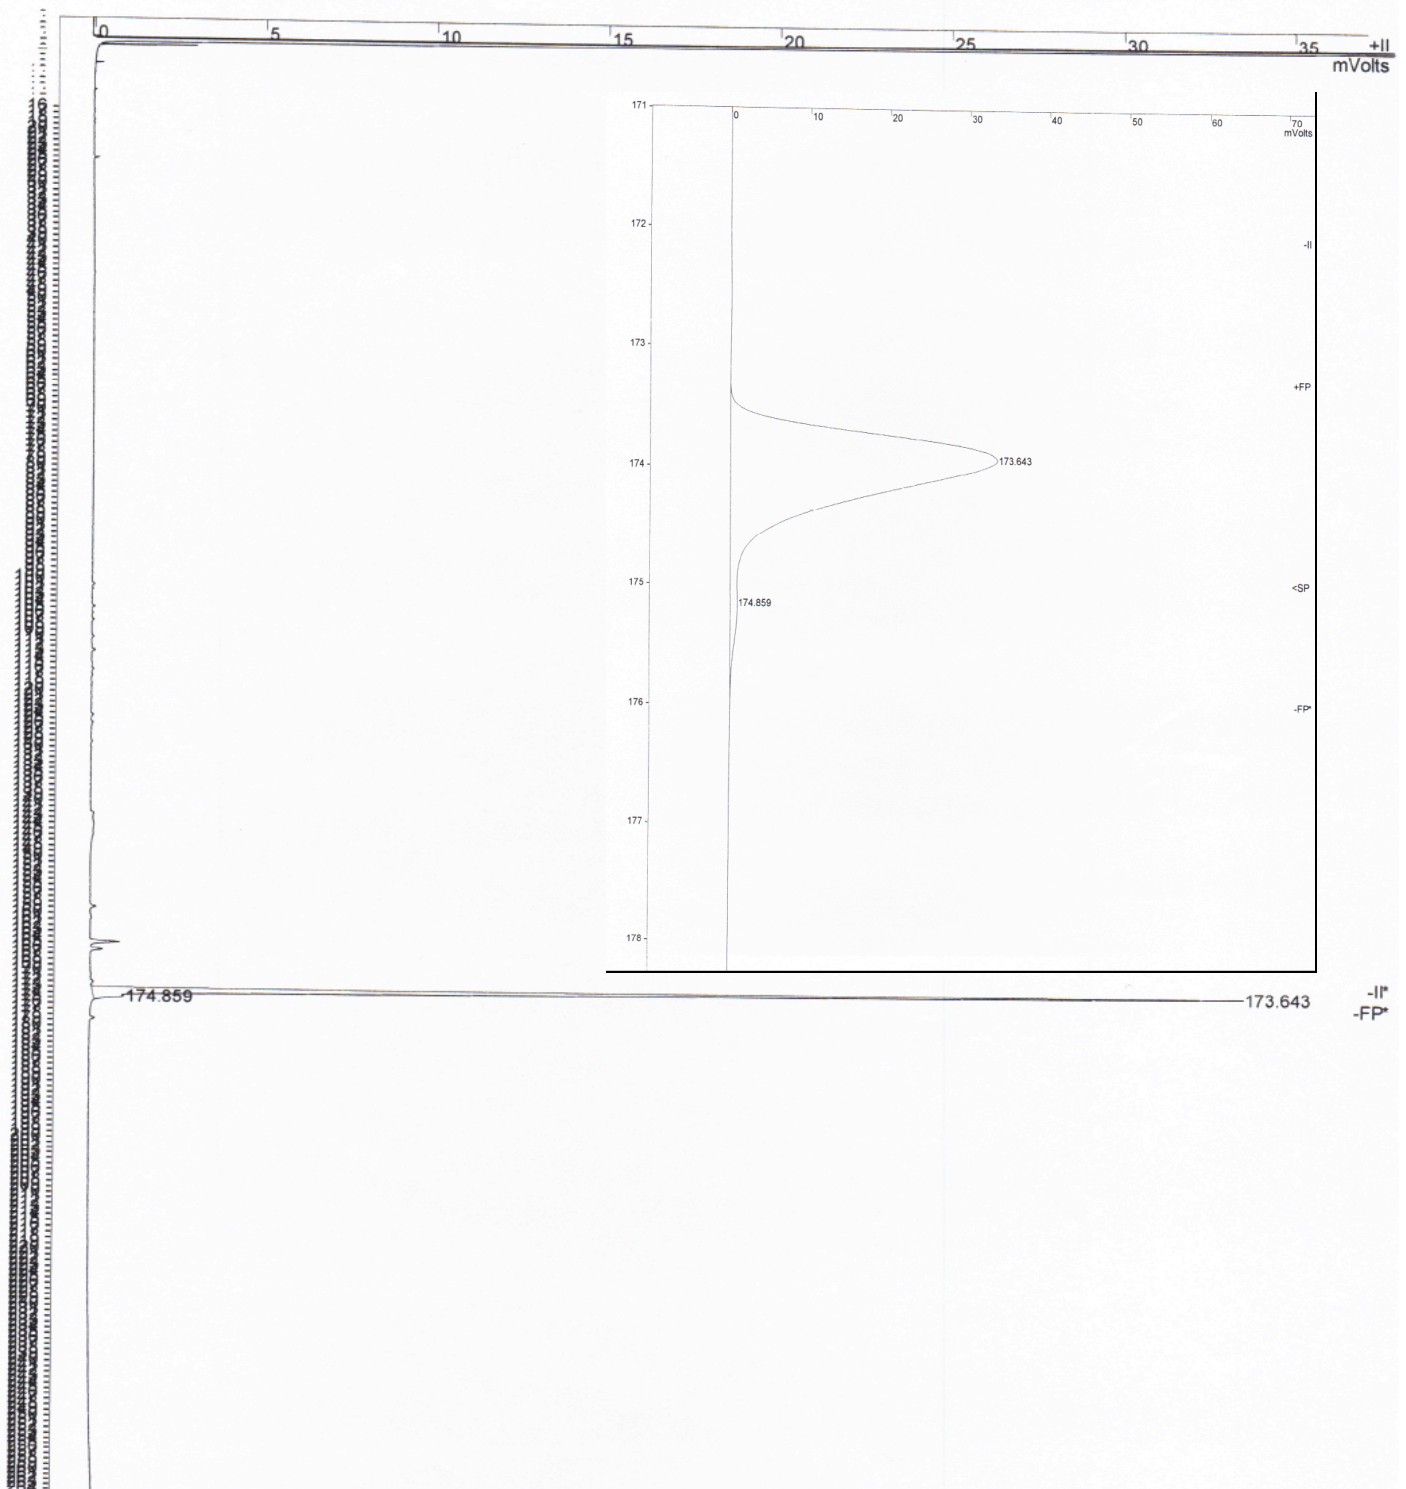

| Peak No. | Peak Name | Result ( ) | Ret. Time (min) | Time Offset (min) | Area (counts) | Sep. Code | Width 1/2 (sec) | Status Codes |
|----------|-----------|------------|-----------------|-------------------|---------------|-----------|-----------------|--------------|
| 1        |           | 97.5296    | 173.643         | 0.000             | 1161249       | BV        | 0.0             |              |
| 2        |           | 2.4704     | 174.859         | 0.000             | 29414         | VB        | 4.2             |              |
| Totals:  |           | 100.0000   |                 | 0.000             | 1190663       |           |                 |              |

$^1\text{H}$  NMR spectrum of **5** (400 MHz,  $\text{CDCl}_3$ )

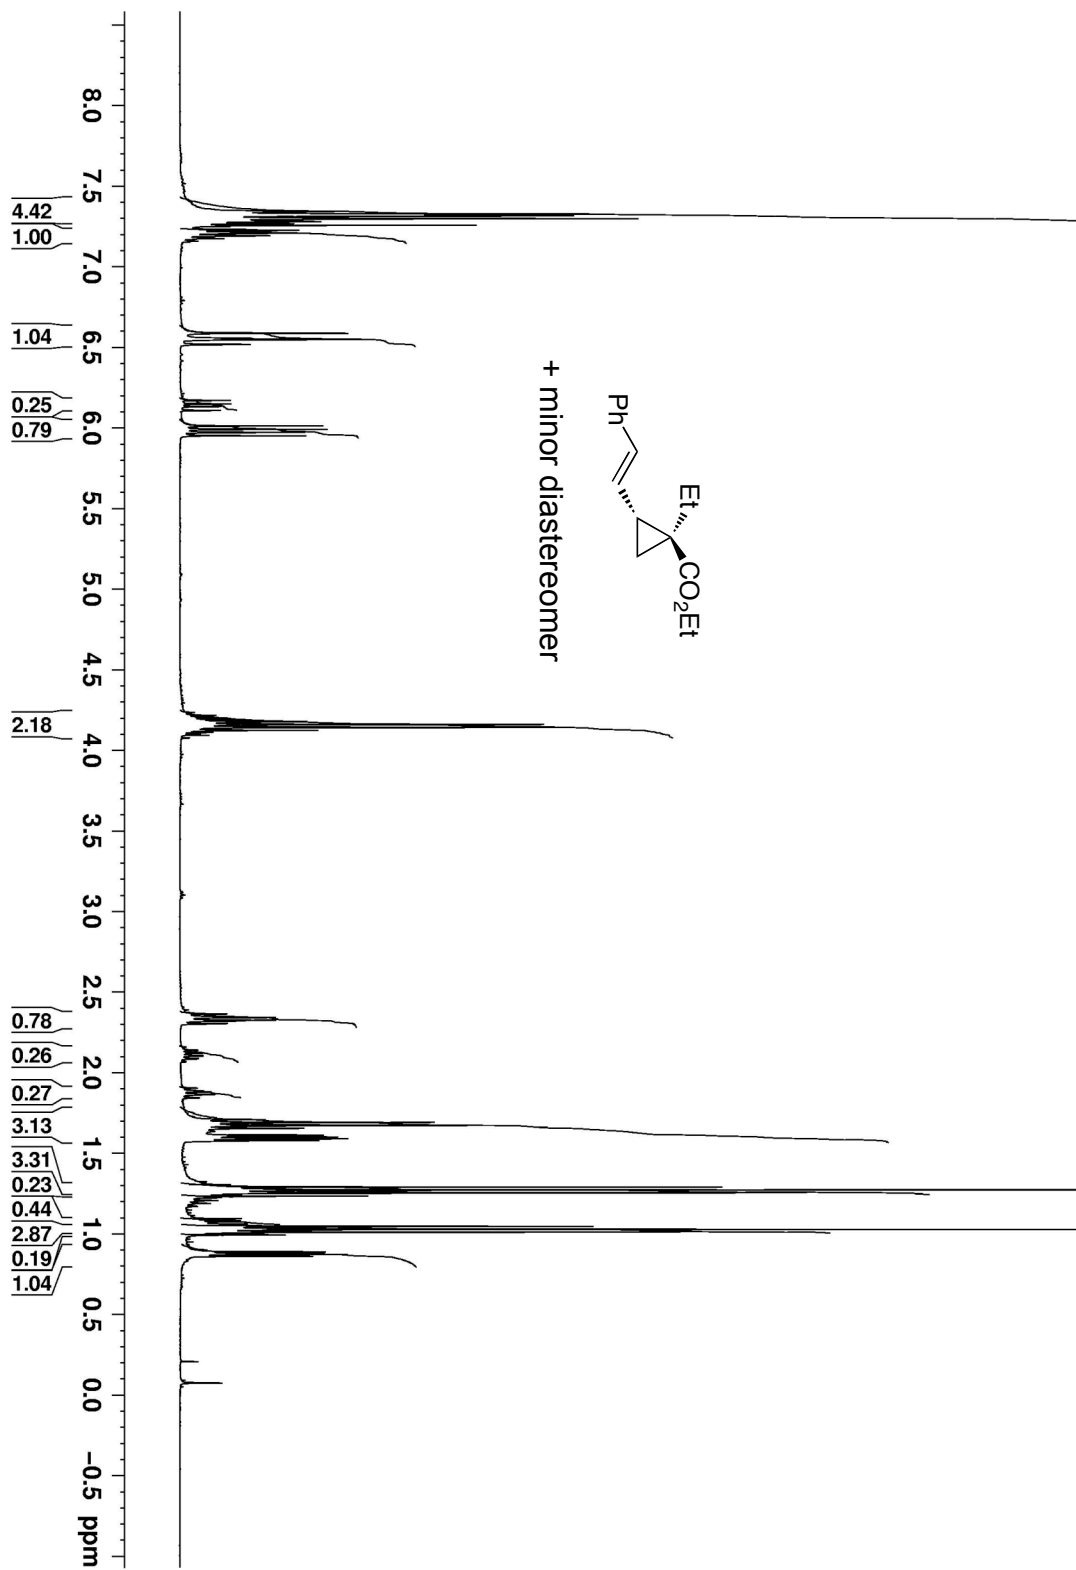

$^{13}\text{C}$  NMR spectrum of **5** (100 MHz,  $\text{CDCl}_3$ )

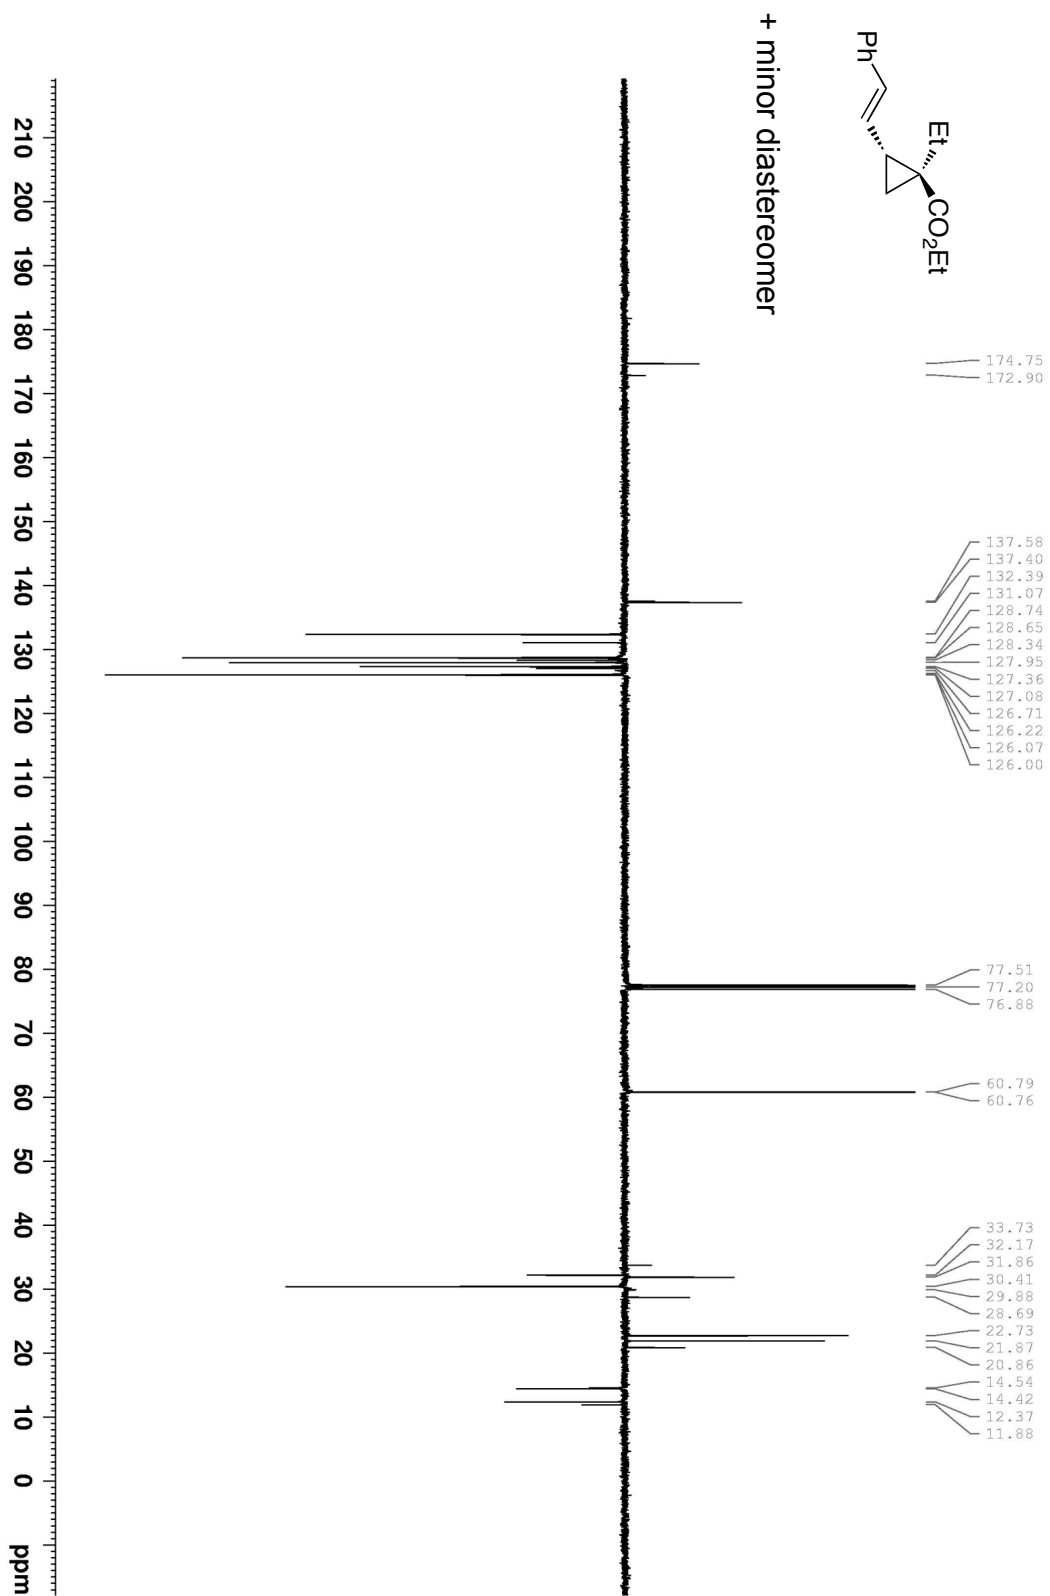



HPLC resolution of racemic **5** (Chiracel IA column, 99.9:0.1 hexanes:isopropanol, 1 mL/min, 254 nm)

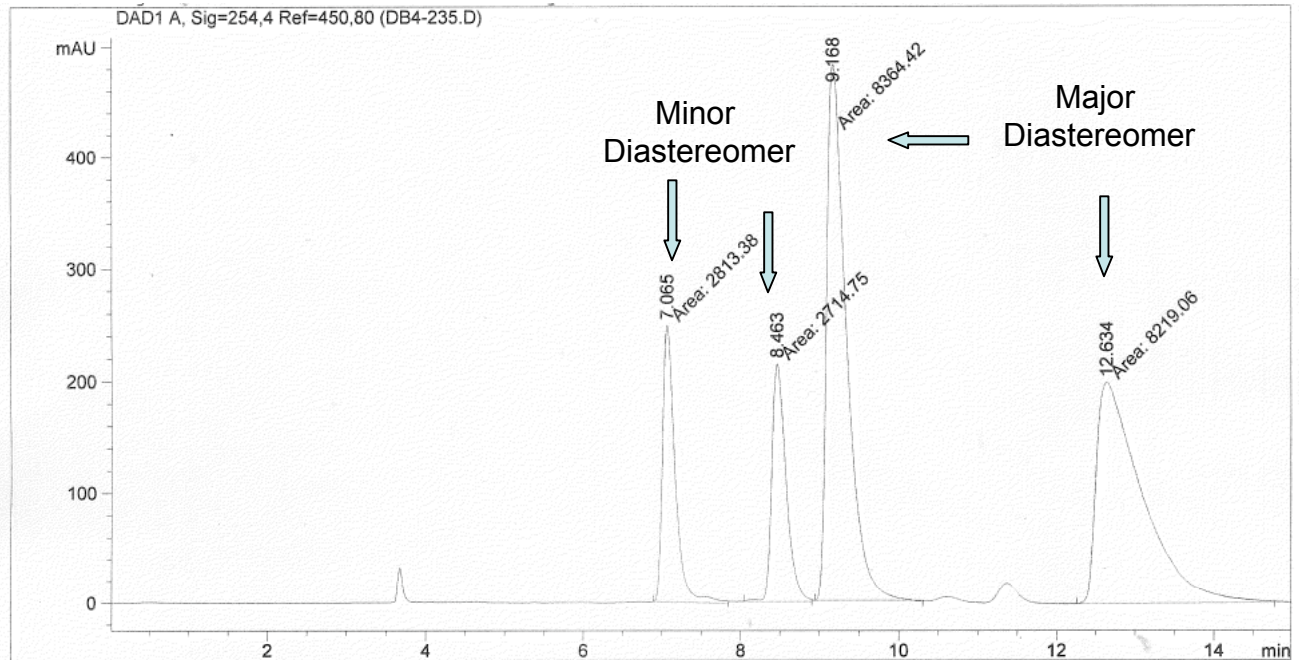

=====  
 Area Percent Report  
 =====

Sorted By : Signal  
 Multiplier : 1.0000  
 Dilution : 1.0000  
 Use Multiplier & Dilution Factor with ISTDs

Signal 1: DAD1 A, Sig=254,4 Ref=450,80

| Peak # | RetTime [min] | Type | Width [min] | Area [mAU*s] | Height [mAU] | Area %  |
|--------|---------------|------|-------------|--------------|--------------|---------|
| 1      | 7.065         | MM   | 0.1879      | 2813.38208   | 249.58528    | 12.7236 |
| 2      | 8.463         | MM   | 0.2104      | 2714.75269   | 215.04797    | 12.2775 |
| 3      | 9.168         | MM   | 0.2894      | 8364.41699   | 481.76370    | 37.8282 |
| 4      | 12.634        | MM   | 0.6864      | 8219.05664   | 199.57355    | 37.1708 |

HPLC of **5** (Chiracel IA column, 99.9:0.1 hexanes:isopropanol, 1 mL/min,  
254nm)

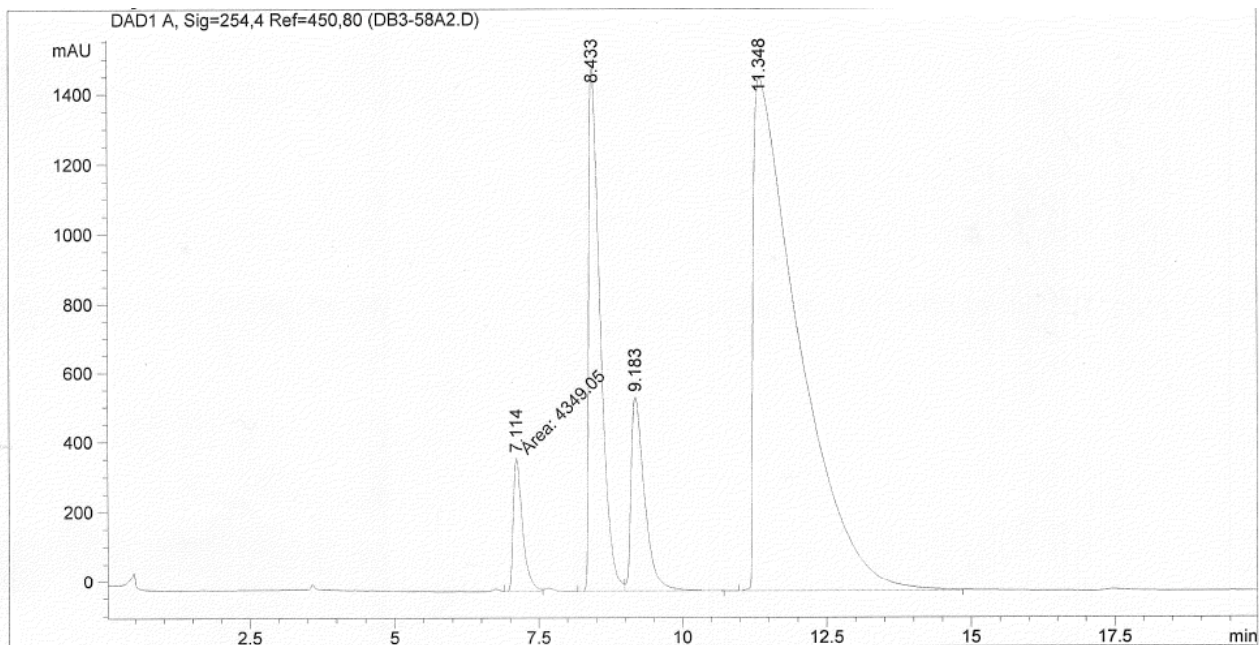

=====  
Area Percent Report  
=====

Sorted By : Signal  
Multiplier : 1.0000  
Dilution : 1.0000  
Use Multiplier & Dilution Factor with ISTDs

Signal 1: DAD1 A, Sig=254,4 Ref=450,80

| Peak # | RetTime [min] | Type | Width [min] | Area [mAU*s] | Height [mAU] | Area %  |
|--------|---------------|------|-------------|--------------|--------------|---------|
| 1      | 7.114         | MM   | 0.1886      | 4349.04980   | 384.35138    | 3.7872  |
| 2      | 8.433         | VV   | 0.2006      | 2.10179e4    | 1511.60791   | 18.3024 |
| 3      | 9.183         | VB   | 0.2432      | 9198.65234   | 558.88684    | 8.0102  |
| 4      | 11.348        | PV   | 0.6832      | 8.02710e4    | 1474.23840   | 69.9002 |

GC trace of **6** (Hewlett Packard HP1 column, 200 °C injection, 50–300 °C over 27 min)

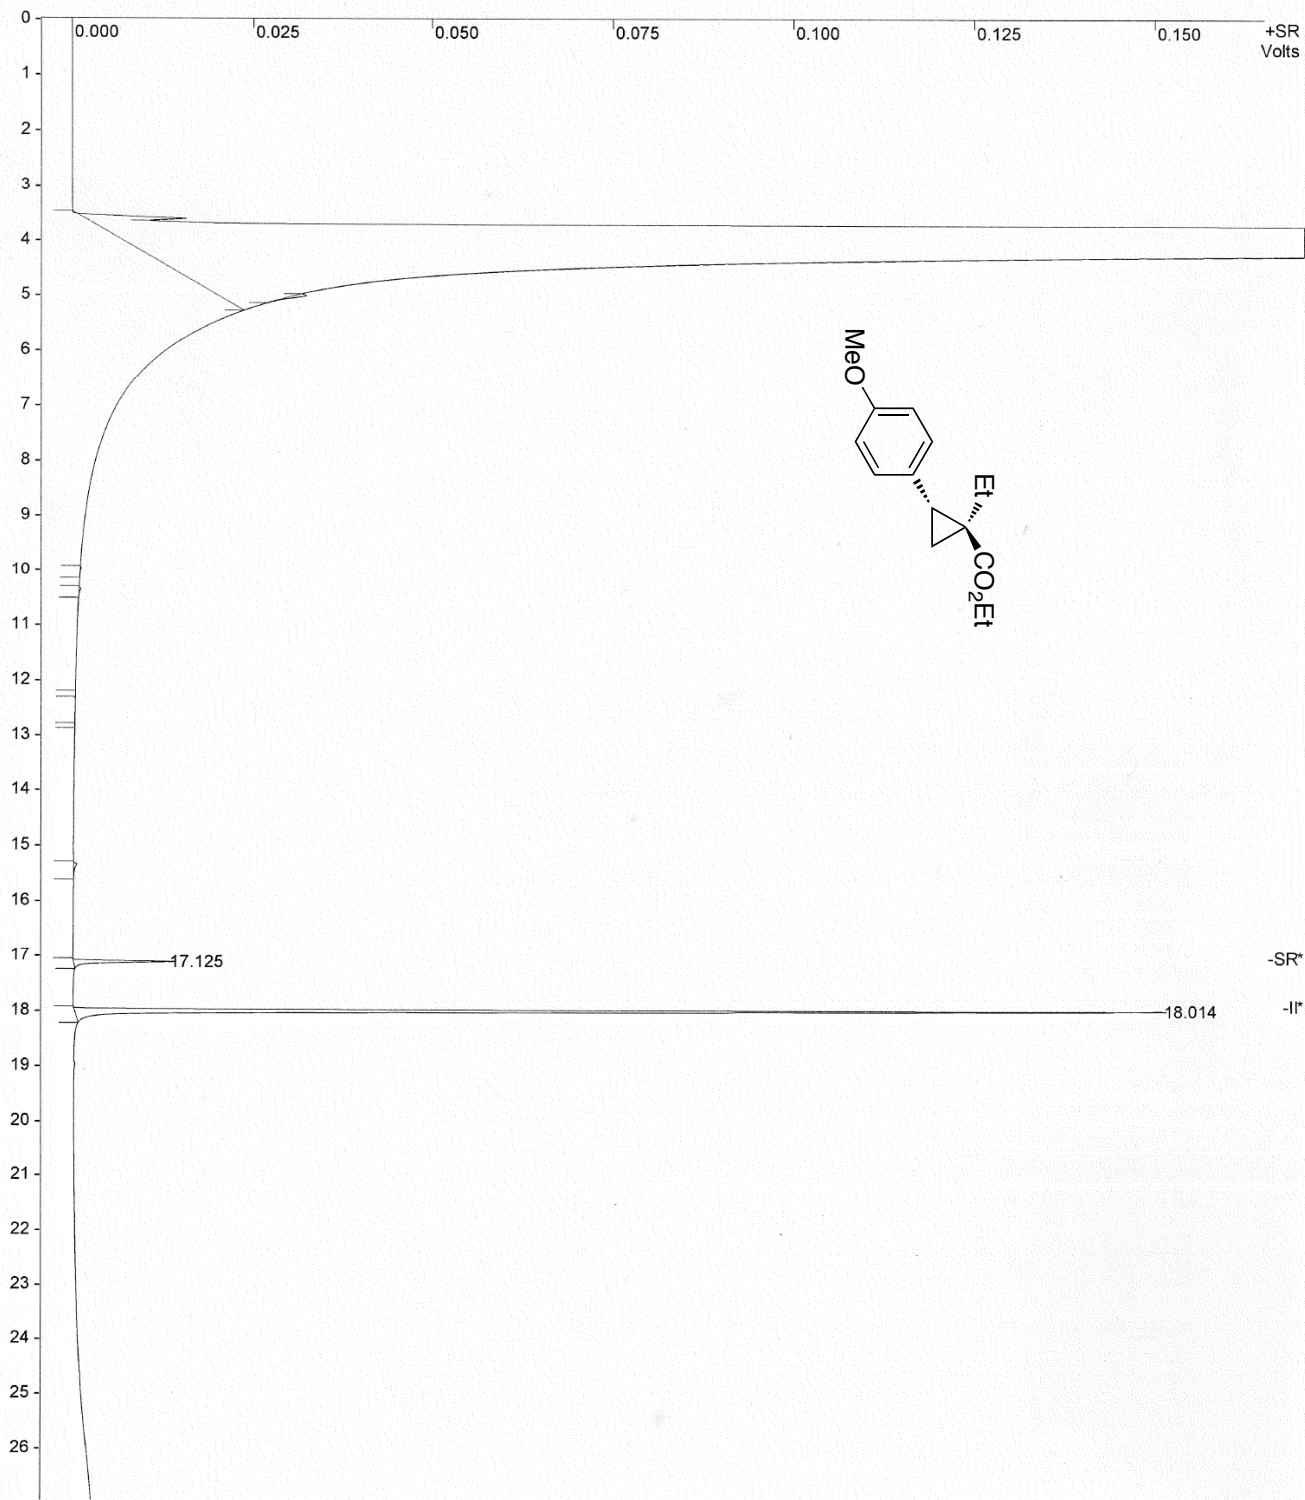

Run Mode : Analysis  
 Peak Measurement: Peak Area  
 Calculation Type: Percent

| Peak No. | Peak Name | Result (%) | Ret. Time (min) | Time Offset (min) | Area (counts) | Sep. Code | Width 1/2 (sec) | Status Codes |
|----------|-----------|------------|-----------------|-------------------|---------------|-----------|-----------------|--------------|
| 1        |           | 8.3444     | 17.125          | 0.000             | 37759         | BB        | 2.3             |              |
| 2        |           | 91.6556    | 18.014          | 0.000             | 414746        | BB        | 2.4             |              |
| Totals:  |           | 100.0000   |                 | 0.000             | 452505        |           |                 |              |



Enantiomeric excess of **6** (Chiracel OJ-H column, 99.9:0.1 hexanes:isopropanol, 1 mL/min, 230nm) synthesized with  $\text{Rh}_2(\text{S-PTTL})_3(\text{TPA})$

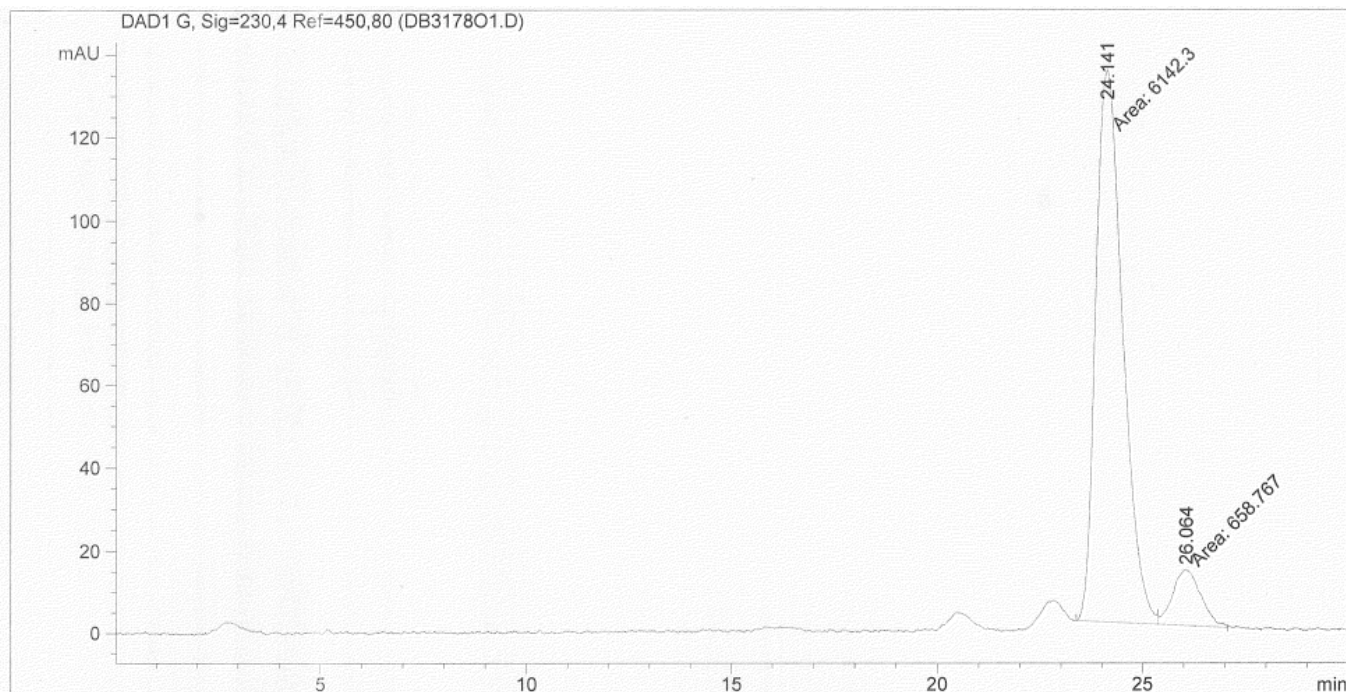

=====  
Area Percent Report  
=====

Sorted By : Signal  
Multiplier : 1.0000  
Dilution : 1.0000  
Use Multiplier & Dilution Factor with ISTDs

Signal 1: DAD1 G, Sig=230,4 Ref=450,80

| Peak # | RetTime [min] | Type | Width [min] | Area [mAU*s] | Height [mAU] | Area %  |
|--------|---------------|------|-------------|--------------|--------------|---------|
| 1      | 24.141        | MF   | 0.7666      | 6142.29736   | 133.53375    | 90.3138 |
| 2      | 26.064        | FM   | 0.8047      | 658.76740    | 13.64360     | 9.6862  |

Coinjection of (1S, 2R) and (1R,2S) **6** to give near-racemate (Chiracel OJ-H column, 99.9:0.1 hexanes:isopropanol, 1 mL/min, 240nm)

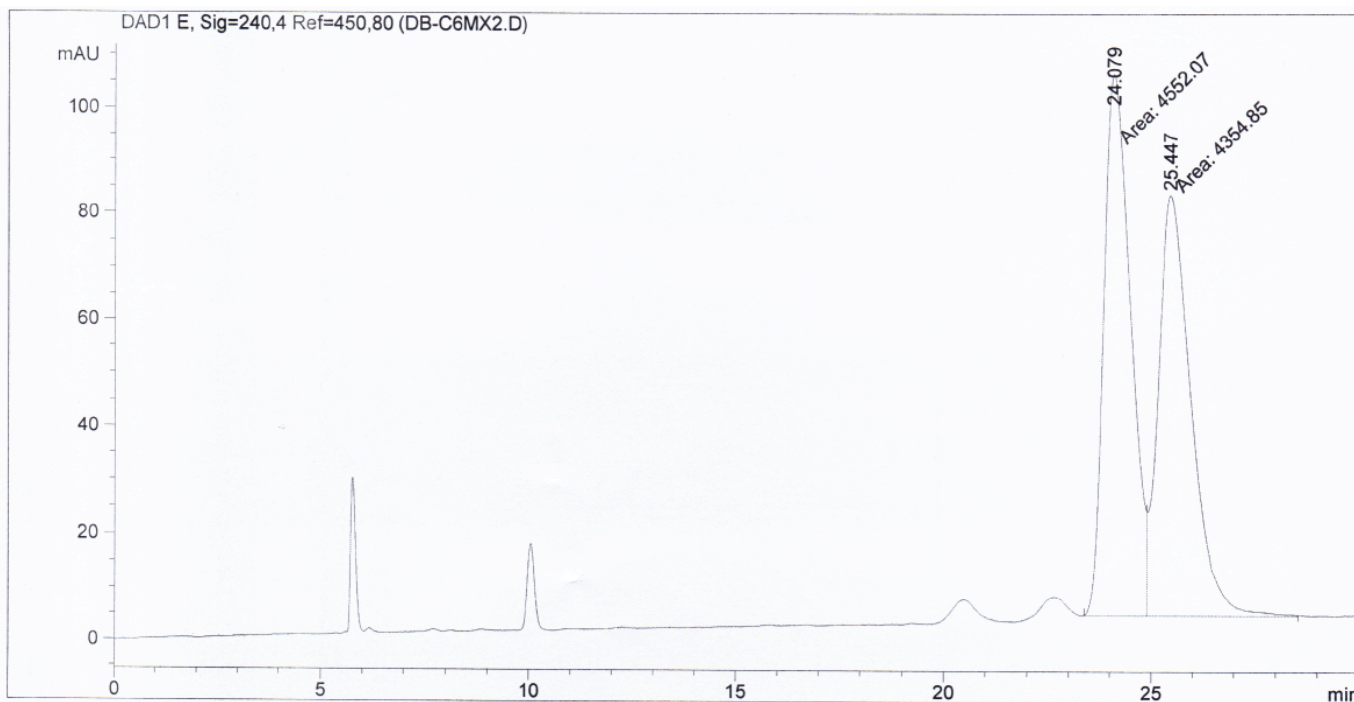

=====  
 Area Percent Report  
 =====

Sorted By : Signal  
 Multiplier : 1.0000  
 Dilution : 1.0000  
 Use Multiplier & Dilution Factor with ISTDs

Signal 1: DAD1 E, Sig=240,4 Ref=450,80

| Peak # | RetTime [min] | Type | Width [min] | Area [mAU*s] | Height [mAU] | Area %  |
|--------|---------------|------|-------------|--------------|--------------|---------|
| 1      | 24.079        | MF   | 0.7484      | 4552.06738   | 101.37346    | 51.1071 |
| 2      | 25.447        | FM   | 0.9224      | 4354.84619   | 78.68336     | 48.8929 |

GC trace of 7 (Hewlett Packard HP1 column, 200 °C injection, 50–300 °C over 27 min)

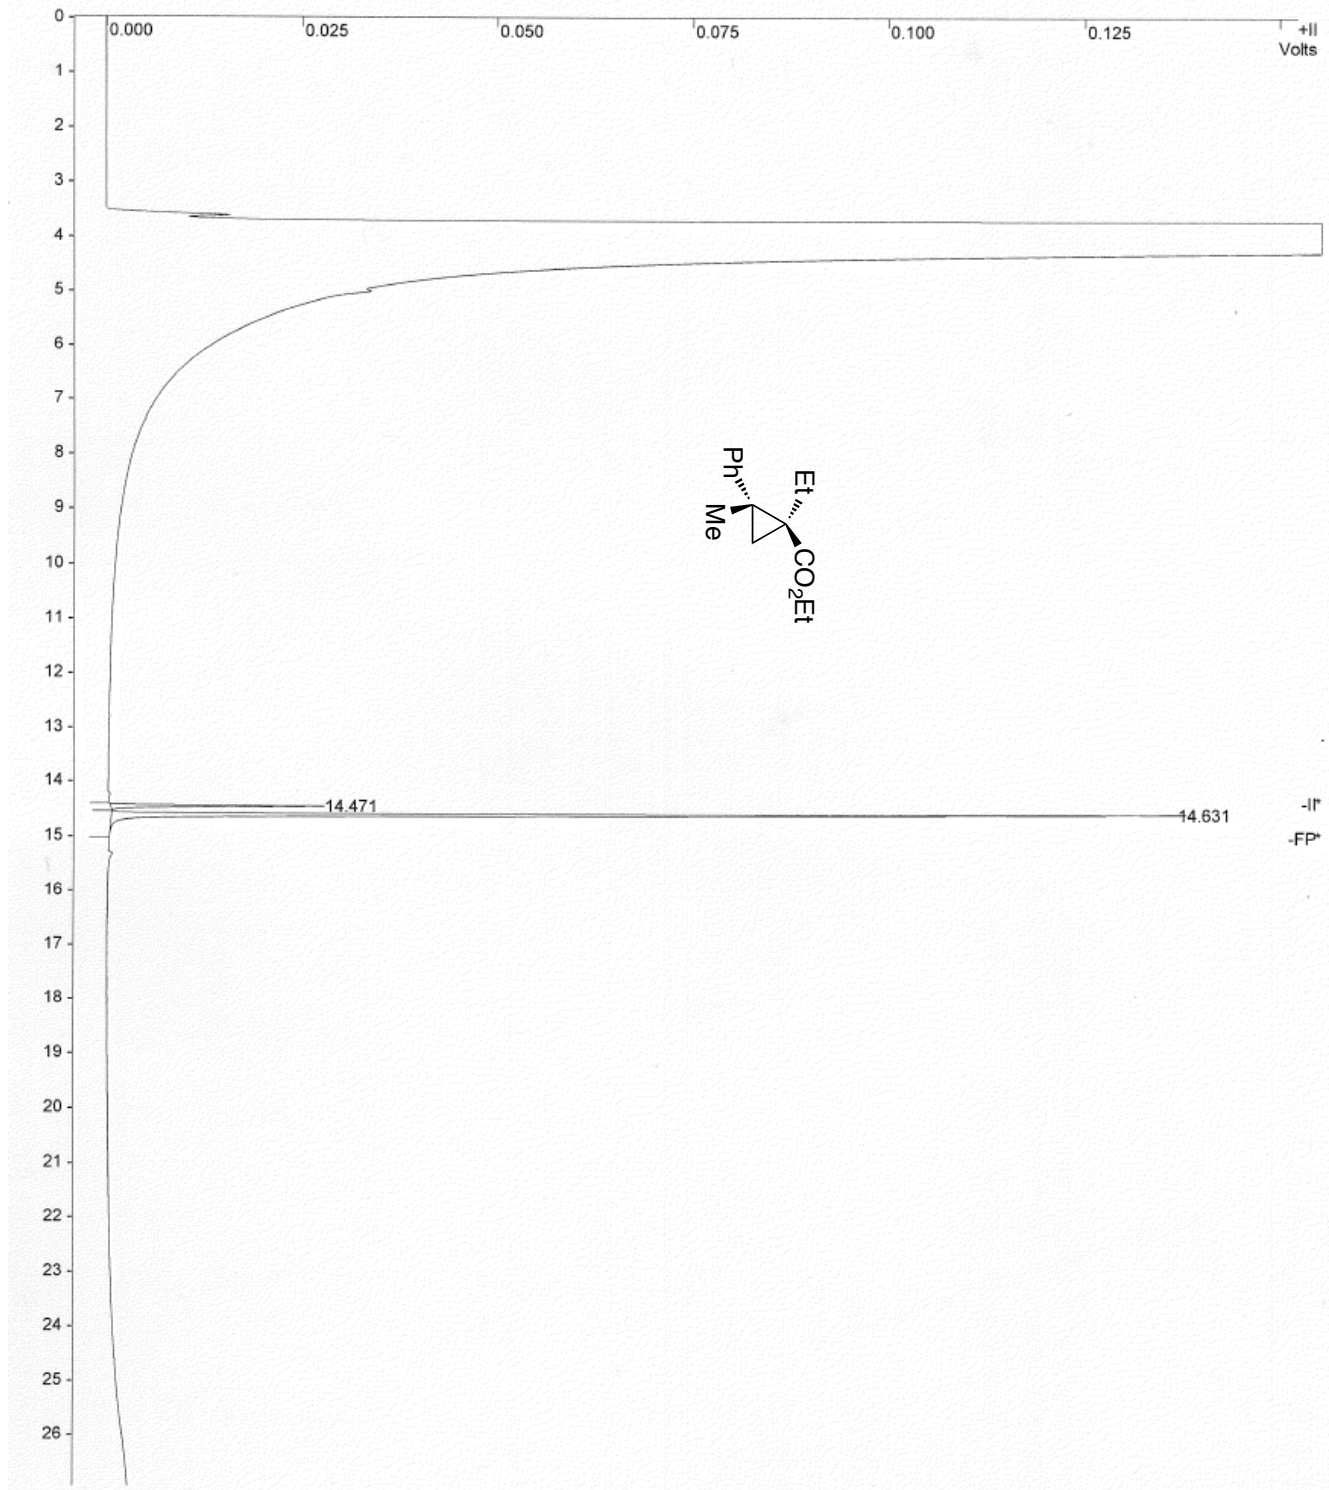

| Peak No. | Peak Name | Result ( ) | Ret. Time (min) | Time Offset (min) | Area (counts) | Sep. Code | Width 1/2 (sec) | Status Codes |
|----------|-----------|------------|-----------------|-------------------|---------------|-----------|-----------------|--------------|
| 1        |           | 16.1973    | 14.471          | 0.000             | 66272         | BB        | 2.2             |              |
| 2        |           | 83.8027    | 14.631          | 0.000             | 342883        | BB        | 2.2             |              |
| Totals:  |           | 100.0000   |                 | 0.000             | 409155        |           |                 |              |



HPLC resolution of racemic **7** (Chiracel OF column, 99.9:0.1 hexanes:isopropanol, 1 mL/min, 230 nm)

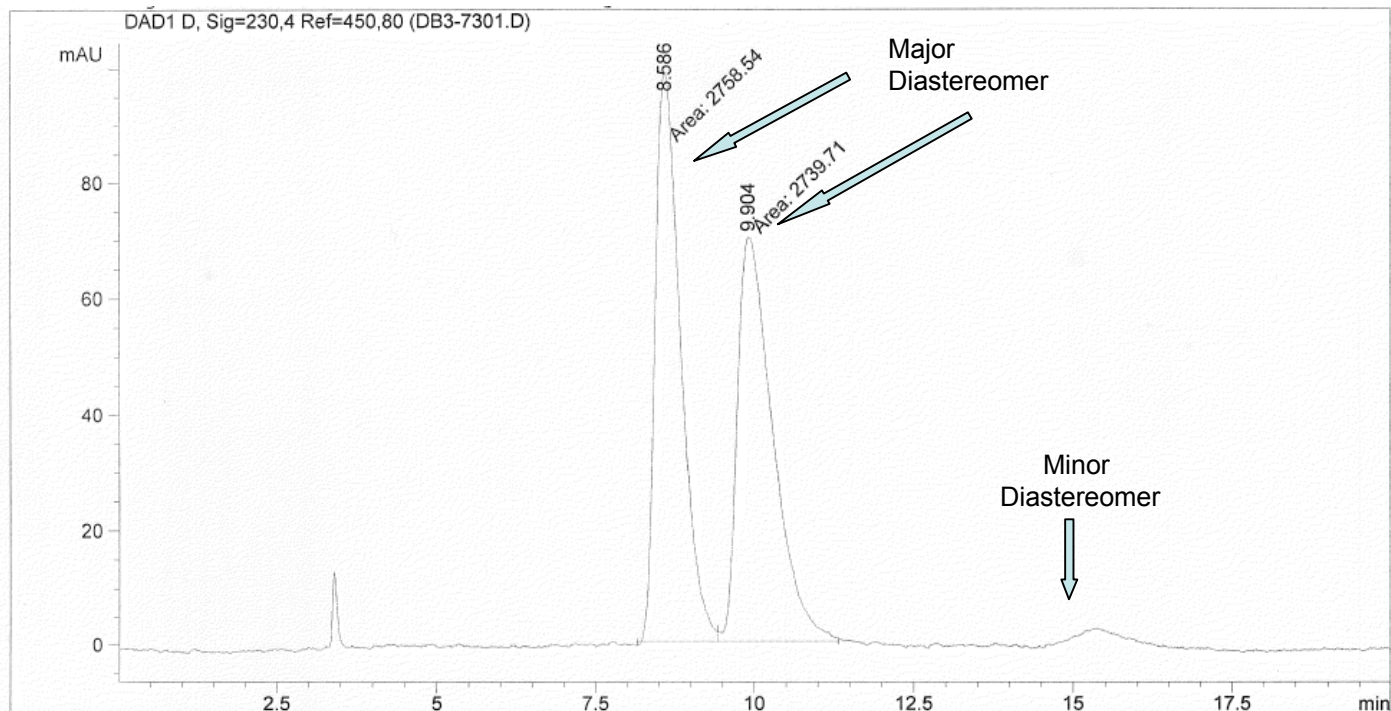

=====  
 Area Percent Report  
 =====

Sorted By : Signal  
 Multiplier : 1.0000  
 Dilution : 1.0000  
 Use Multiplier & Dilution Factor with ISTDs

Signal 1: DAD1 D, Sig=230,4 Ref=450,80

| Peak # | RetTime [min] | Type | Width [min] | Area [mAU*s] | Height [mAU] | Area %  |
|--------|---------------|------|-------------|--------------|--------------|---------|
| 1      | 8.586         | MM   | 0.4649      | 2758.53784   | 98.90098     | 50.1712 |
| 2      | 9.904         | MM   | 0.6531      | 2739.70898   | 69.91819     | 49.8288 |

Enantiomeric excess of **7** (Chiracel OF column, 99.9:0.1 hexanes:isopropanol, 1 mL/min, 220nm)

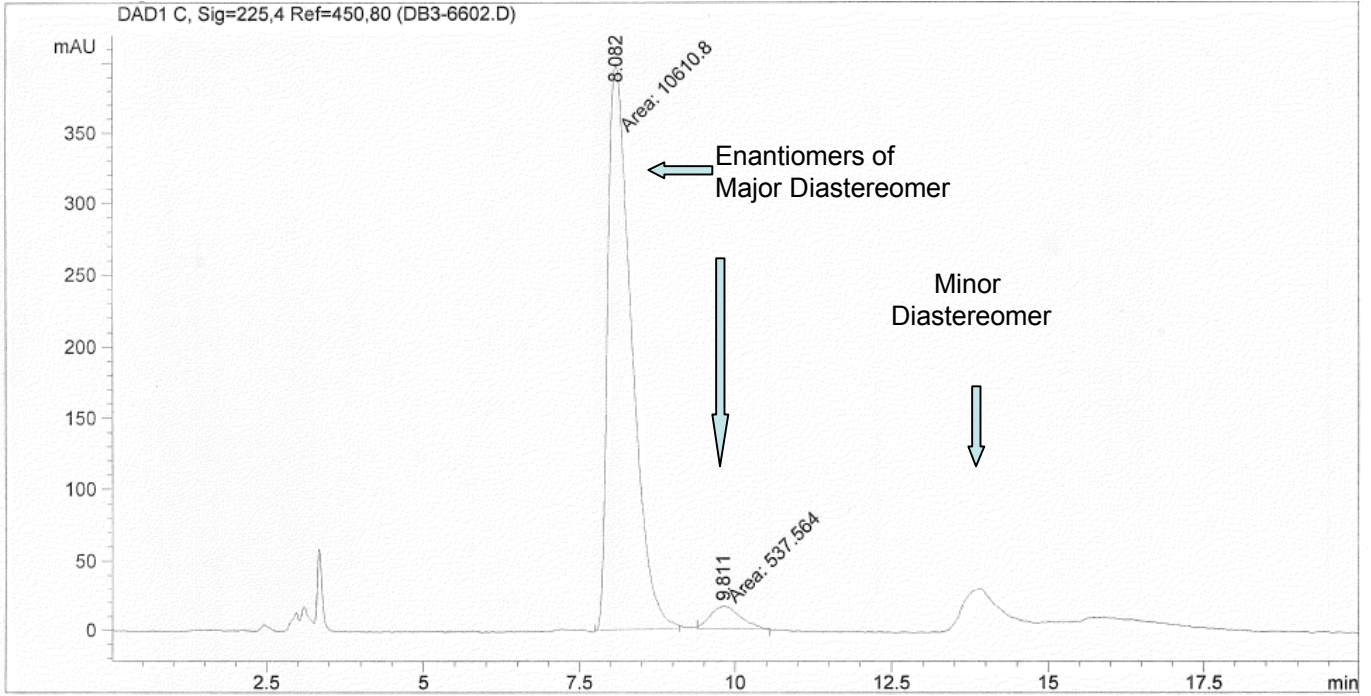

=====  
 Area Percent Report  
 =====

Sorted By : Signal  
 Multiplier : 1.0000  
 Dilution : 1.0000  
 Use Multiplier & Dilution Factor with ISTDs

Signal 1: DAD1 C, Sig=225,4 Ref=450,80

| Peak # | RetTime [min] | Type | Width [min] | Area [mAU*s] | Height [mAU] | Area %  |
|--------|---------------|------|-------------|--------------|--------------|---------|
| 1      | 8.082         | MM   | 0.4431      | 1.06108e4    | 399.14804    | 95.1781 |
| 2      | 9.811         | MM   | 0.5548      | 537.56384    | 16.14973     | 4.8219  |

GC trace of **8** (Hewlett Packard HP5 column, 200 °C injection, 50–300 °C over 27 min)

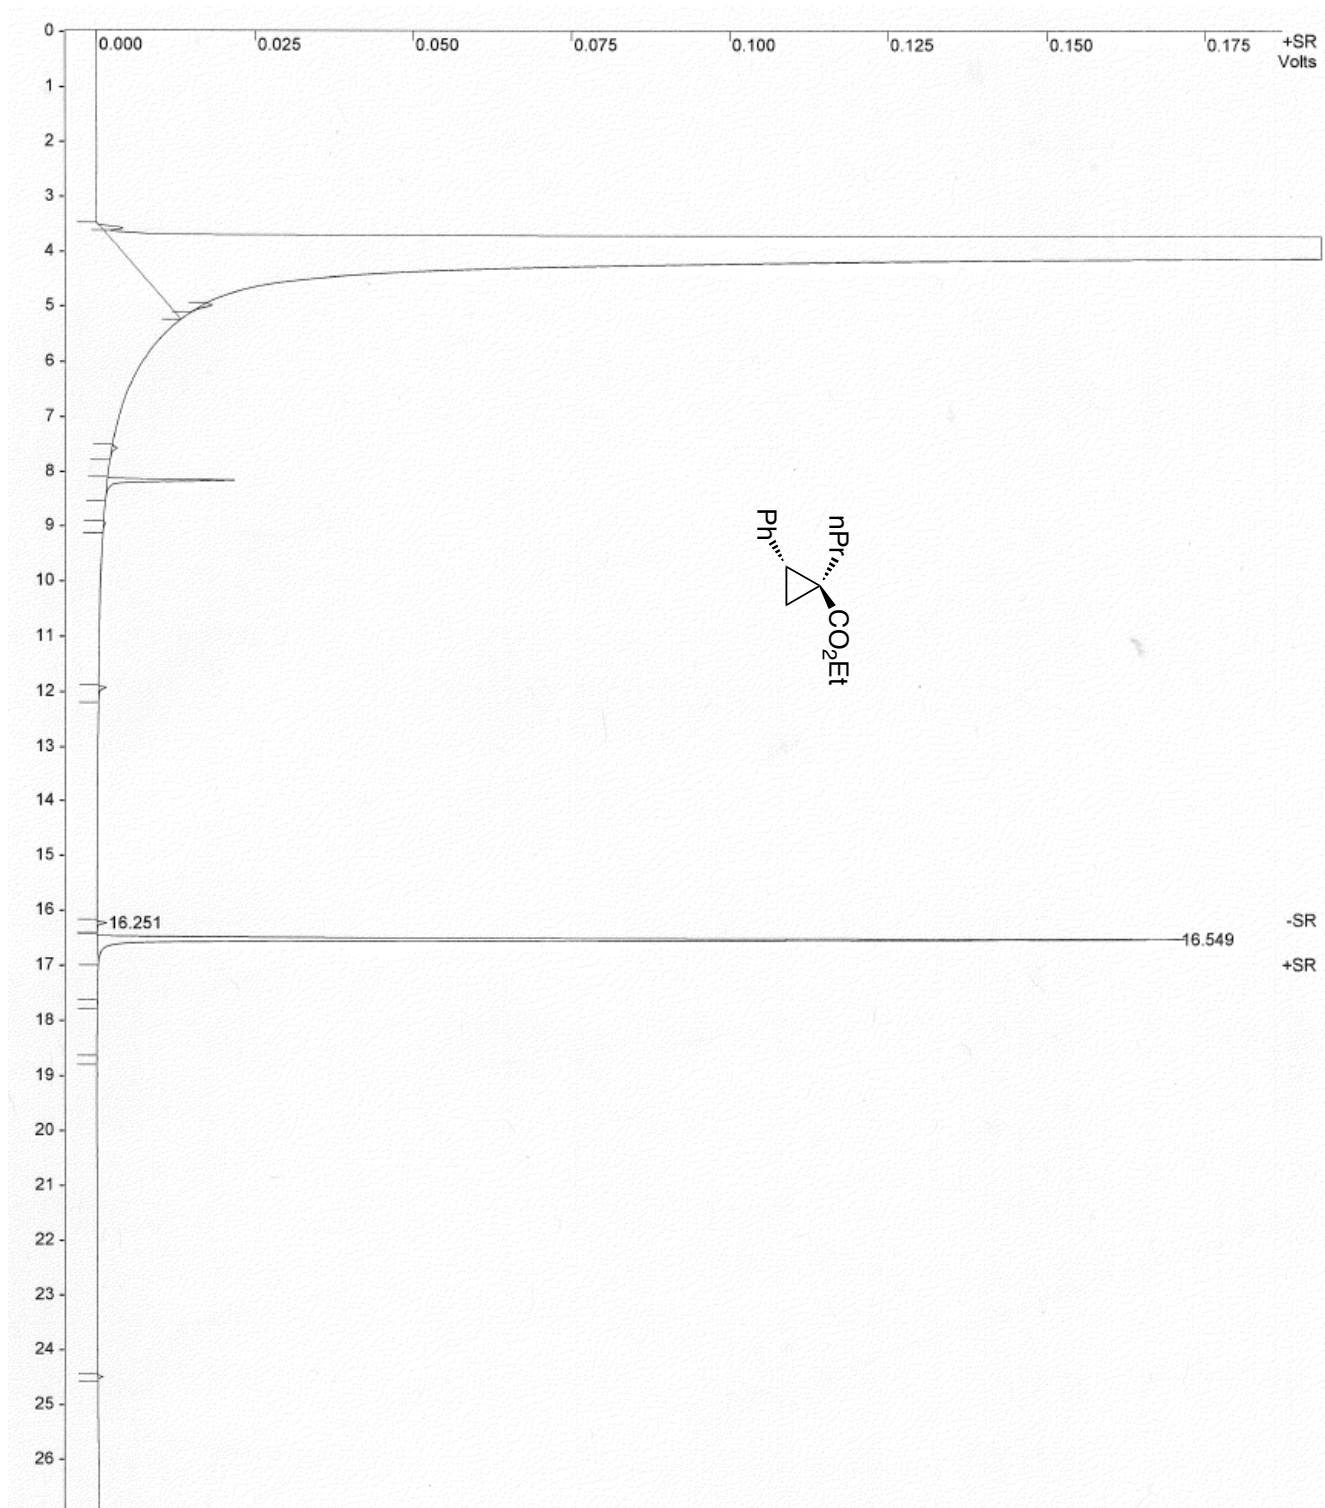

| Peak No. | Peak Name | Result ( ) | Ret. Time (min) | Time Offset (min) | Area (counts) | Sep. Code | Width 1/2 (sec) | Status Codes |
|----------|-----------|------------|-----------------|-------------------|---------------|-----------|-----------------|--------------|
| 1        |           | 0.7813     | 16.251          | 0.000             | 4274          | BB        | 2.4             |              |
| 2        |           | 99.2187    | 16.549          | 0.000             | 542728        | BB        | 2.8             |              |
| Totals:  |           | 100.0000   |                 | 0.000             | 547002        |           |                 |              |



HPLC Resolution of racmic **8** (Chiracel OD column, 99.9:0.1 hexanes:isopropanol, 1 mL/min, 220nm)<sup>6</sup>

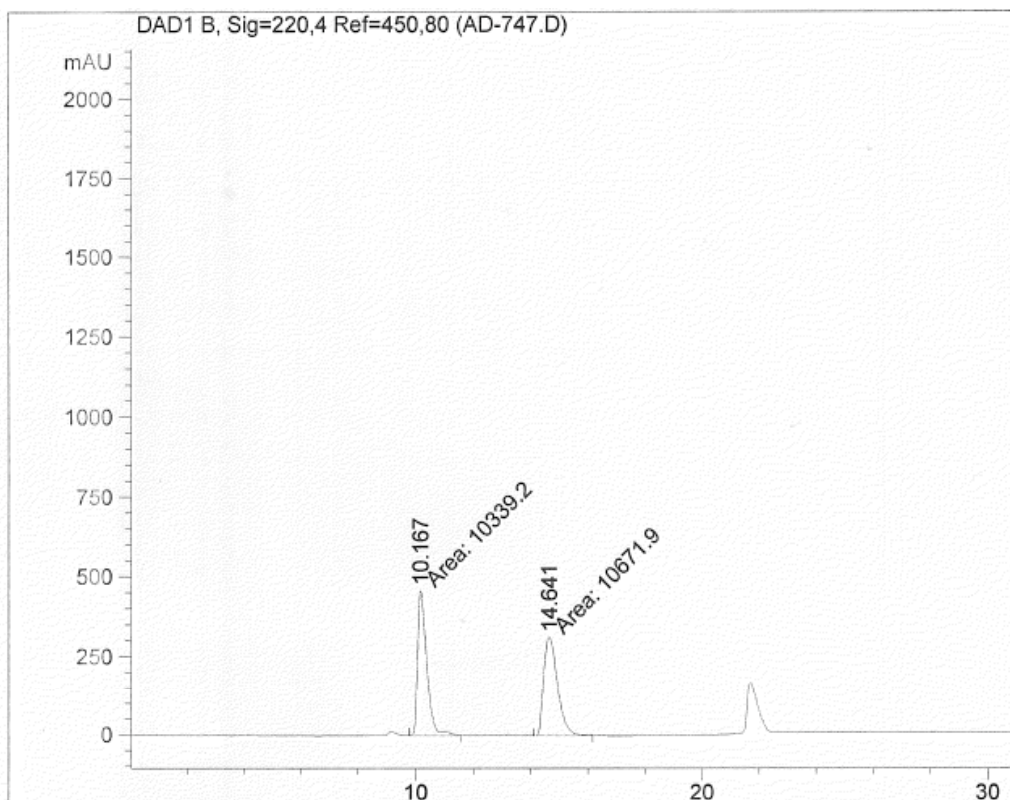

=====  
 Area Percent Report  
 =====

Sorted By : Signal  
 Multiplier : 1.0000  
 Dilution : 1.0000  
 Use Multiplier & Dilution Factor with ISTDs

Signal 1: DAD1 B, Sig=220,4 Ref=450,80

| Peak # | RetTime [min] | Type | Width [min] | Area [mAU*s] | Height [mAU] | Area %  |
|--------|---------------|------|-------------|--------------|--------------|---------|
| 1      | 10.167        | MM   | 0.3759      | 1.03392e4    | 458.38092    | 49.2083 |
| 2      | 14.641        | MM   | 0.5692      | 1.06719e4    | 312.50479    | 50.7917 |



Enantiomeric excess of **8** (Chiracel OD column, 99.9:0.1 hexanes:isopropanol, 1 mL/min, 220nm)

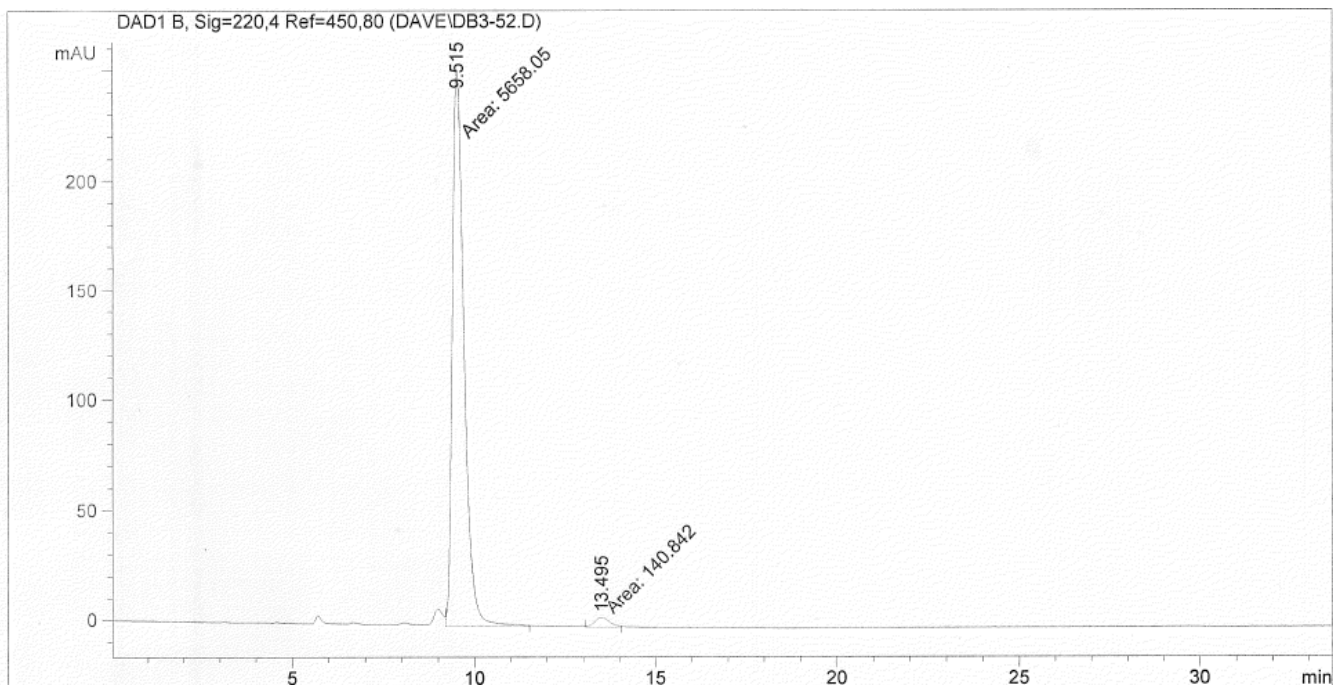

=====  
 Area Percent Report  
 =====

Sorted By : Signal  
 Multiplier : 1.0000  
 Dilution : 1.0000  
 Sample Amount : 1.00000 [ng/ul] (not used in calc.)  
 Use Multiplier & Dilution Factor with ISTDs

Signal 1: DAD1 B, Sig=220,4 Ref=450,80

| Peak # | RetTime [min] | Type | Width [min] | Area [mAU*s] | Height [mAU] | Area %  |
|--------|---------------|------|-------------|--------------|--------------|---------|
| 1      | 9.515         | MM   | 0.3726      | 5658.05420   | 253.08644    | 97.5712 |
| 2      | 13.495        | MM   | 0.5026      | 140.84167    | 4.67056      | 2.4288  |

GC trace of **9** (Hewlett Packard HP5 column, 200 °C injection, 50–300 °C over 27 min)

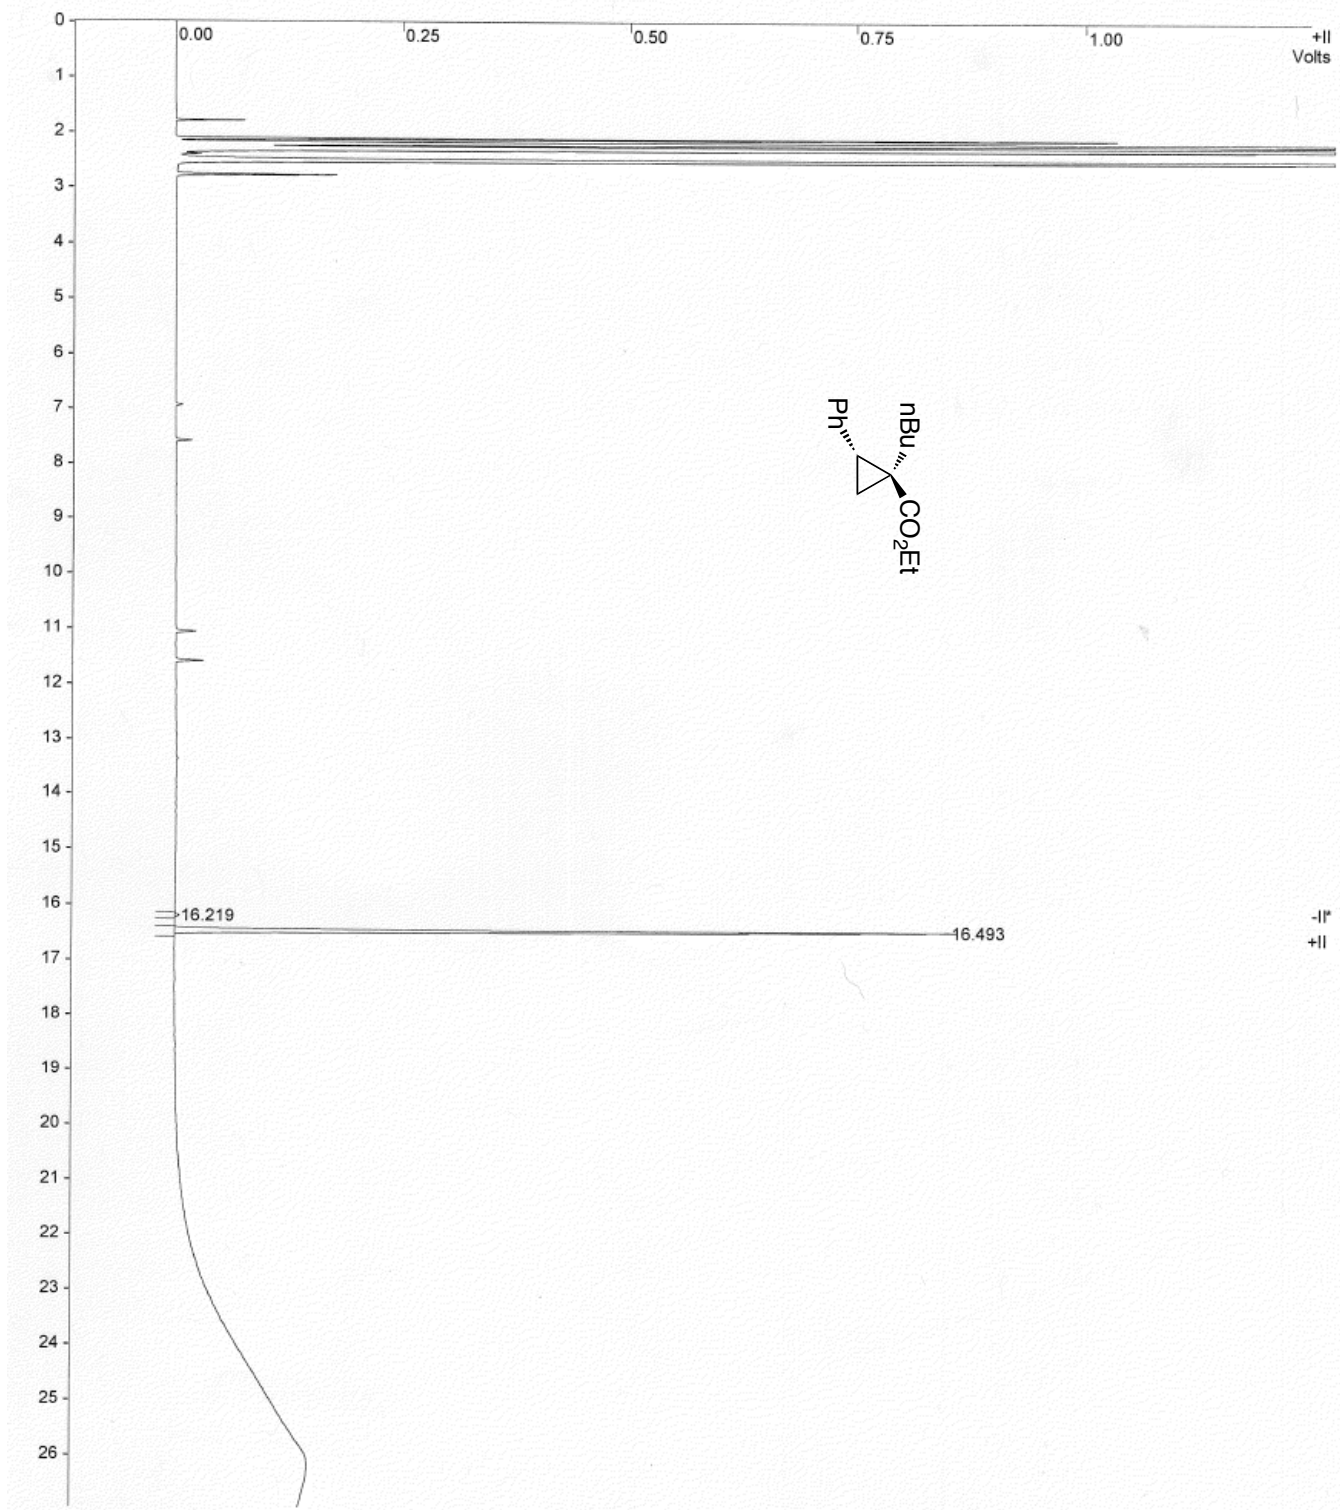

| Peak No. | Peak Name | Result (%) | Ret. Time (min) | Time Offset (min) | Area (counts) | Sep. Code | Width 1/2 (sec) | Status Codes |
|----------|-----------|------------|-----------------|-------------------|---------------|-----------|-----------------|--------------|
| 1        |           | 0.5420     | 16.219          | 0.000             | 13334         | BB        | 2.6             |              |
| 2        |           | 99.4580    | 16.493          | 0.000             | 2446879       | BB        | 2.7             |              |
| Totals:  |           | 100.0000   |                 | 0.000             | 2460213       |           |                 |              |

HPLC Resolution of racmic **9** (Chiracel OD column, 99.9:0.1 hexanes:isopropanol, 1 mL/min, 220nm)<sup>6</sup>

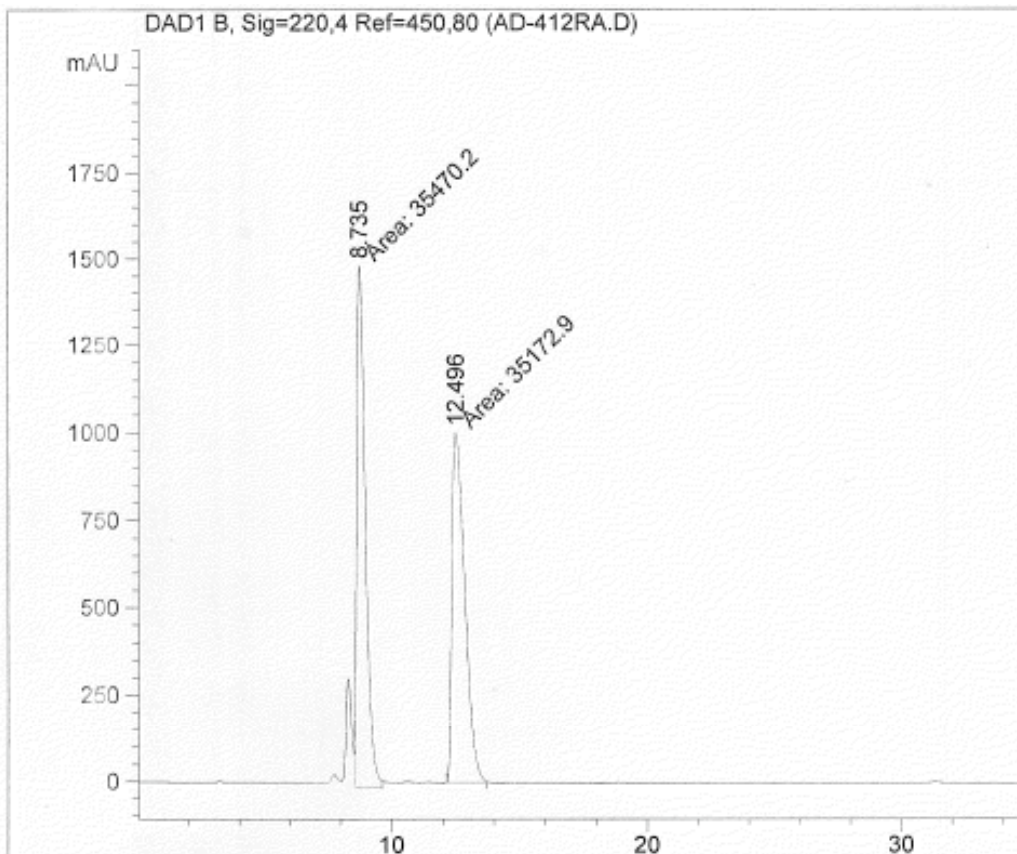

=====  
 Area Percent Report  
 =====

Sorted By : Signal  
 Multiplier : 1.0000  
 Dilution : 1.0000  
 Use Multiplier & Dilution Factor with ISTDs

Signal 1: DAD1 B, Sig=220,4 Ref=450,80

| Peak # | RetTime [min] | Type | Width [min] | Area [mAU*s] | Height [mAU] | Area %  |
|--------|---------------|------|-------------|--------------|--------------|---------|
| 1      | 8.735         | FM   | 0.3950      | 3.54702e4    | 1496.61658   | 50.2105 |
| 2      | 12.496        | MM   | 0.5842      | 3.51729e4    | 1003.45349   | 49.7895 |



Enantiomeric excess of **9** (Chiracel OD column, 99.9:0.1 hexanes:isopropanol, 1 mL/min, 220nm)

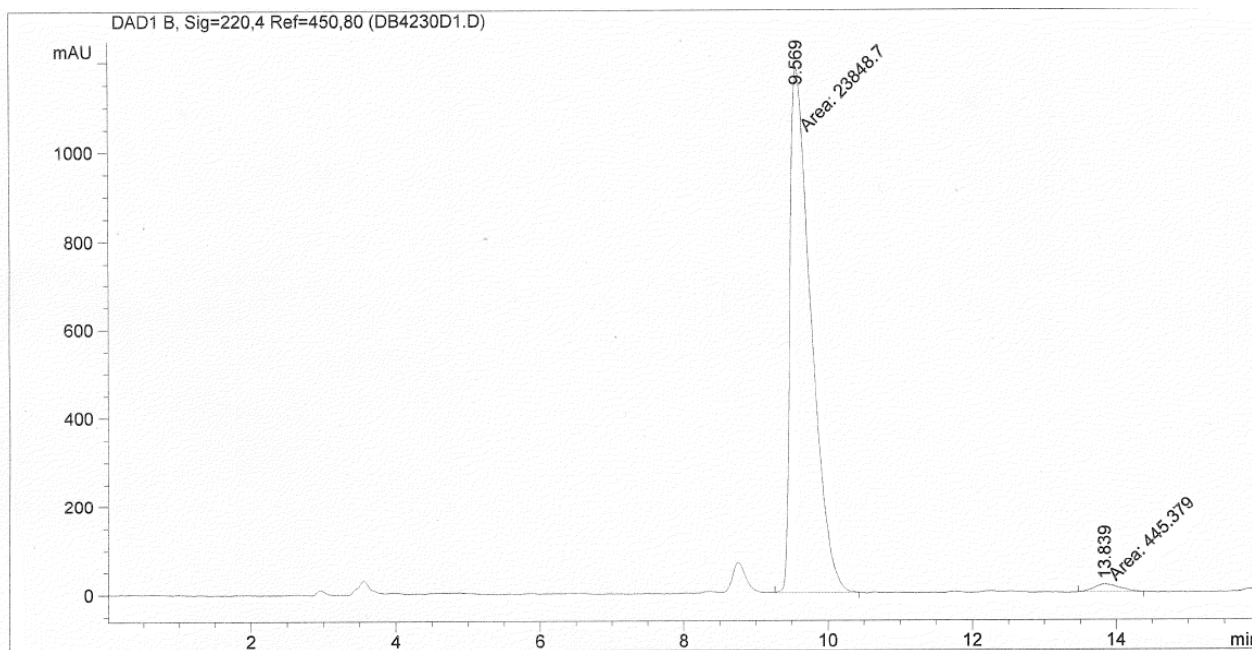

=====  
 Area Percent Report  
 =====

Sorted By : Signal  
 Multiplier : 1.0000  
 Dilution : 1.0000  
 Use Multiplier & Dilution Factor with ISTDs

Signal 1: DAD1 B, Sig=220,4 Ref=450,80

| Peak # | RetTime [min] | Type | Width [min] | Area [mAU*s] | Height [mAU] | Area %  |
|--------|---------------|------|-------------|--------------|--------------|---------|
| 1      | 9.569         | MM   | 0.3349      | 2.38487e4    | 1187.02502   | 98.1667 |
| 2      | 13.839        | MM   | 0.4232      | 445.37918    | 17.54071     | 1.8333  |



$^1\text{H}$  NMR spectrum of **10** (400 MHz,  $\text{C}_6\text{D}_6$ )

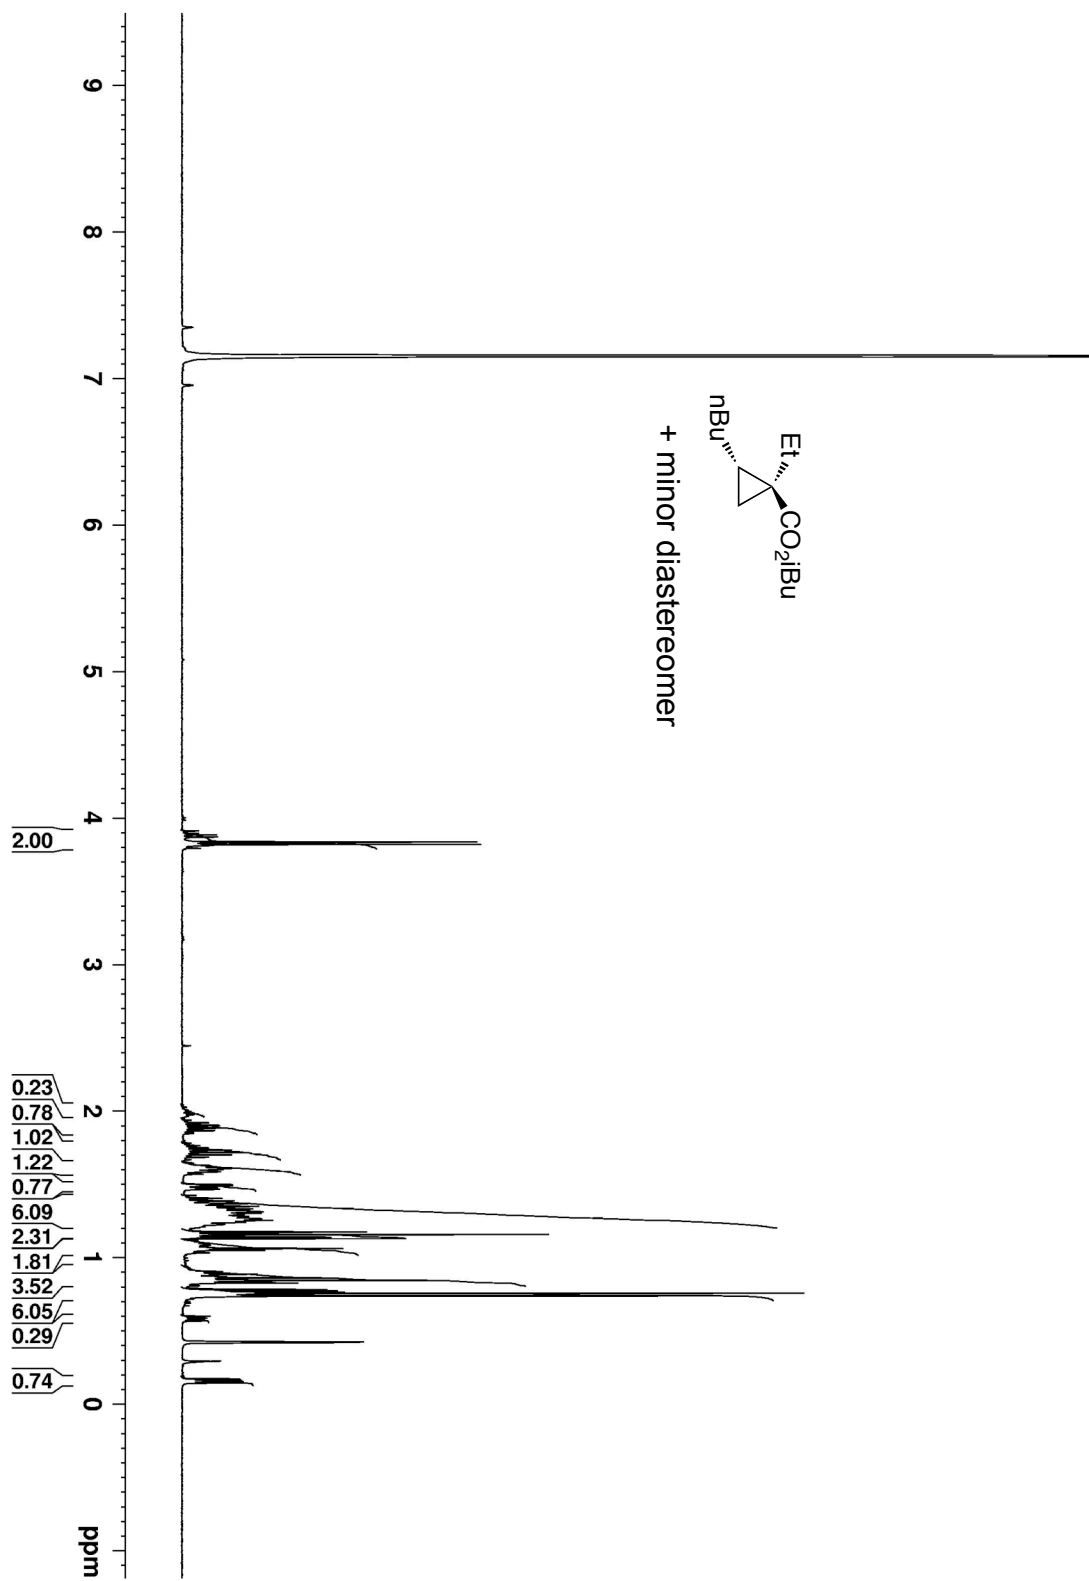

$^{13}\text{C}$  NMR spectrum of **10** (100 MHz,  $\text{C}_6\text{D}_6$ )

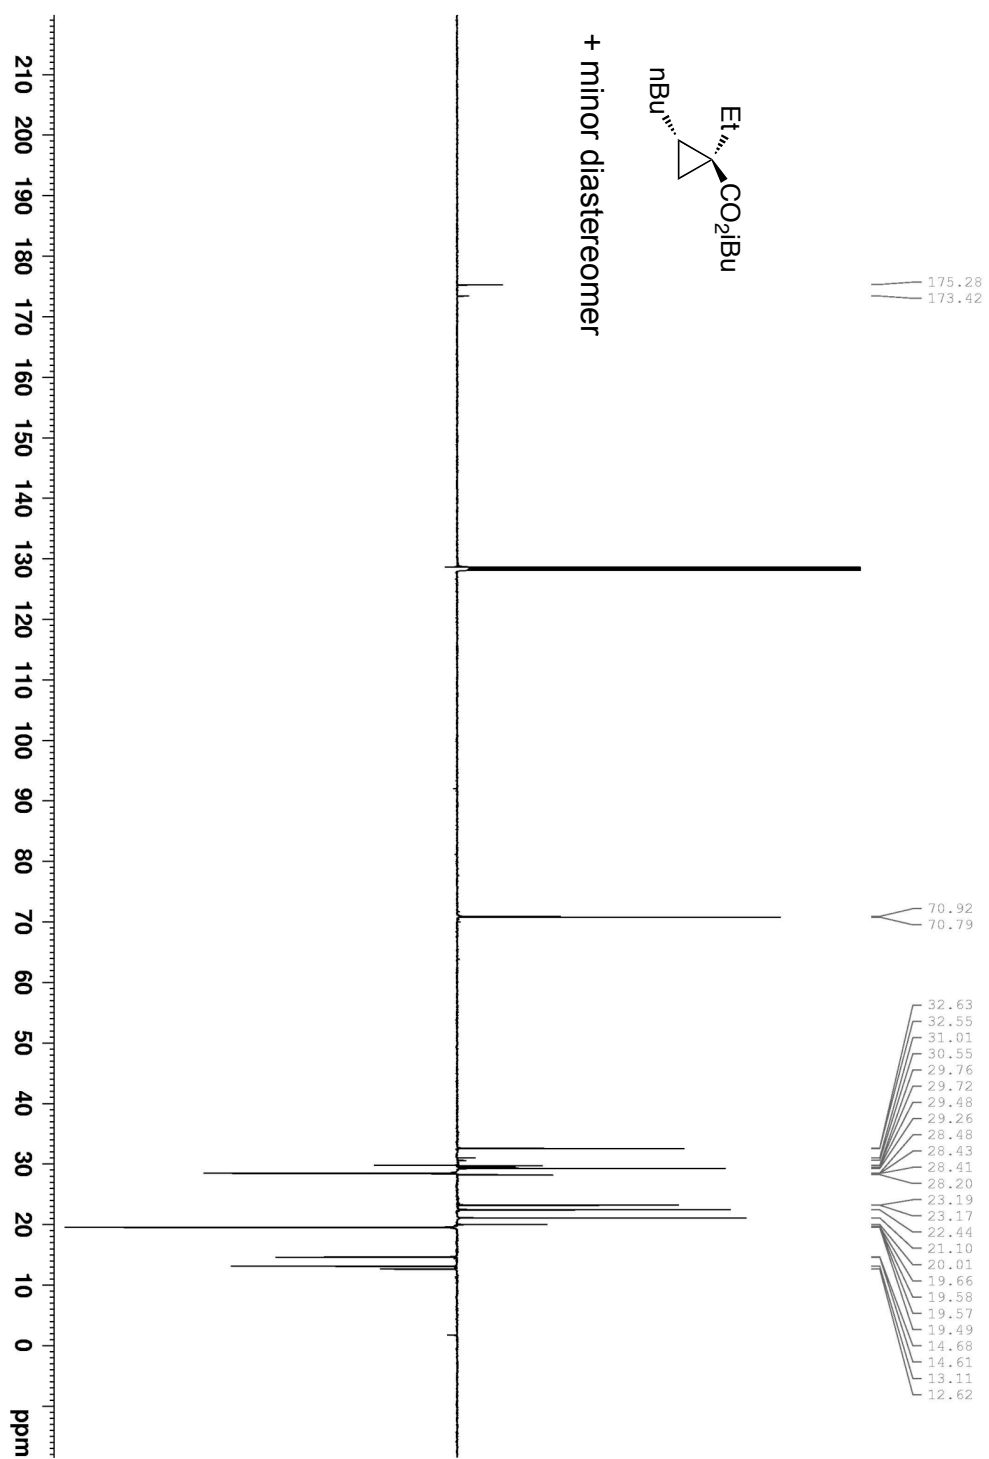

GC trace of **10** (Hewlett Packard HP1 column, 200 °C injection, 50–300 °C over 27 min)

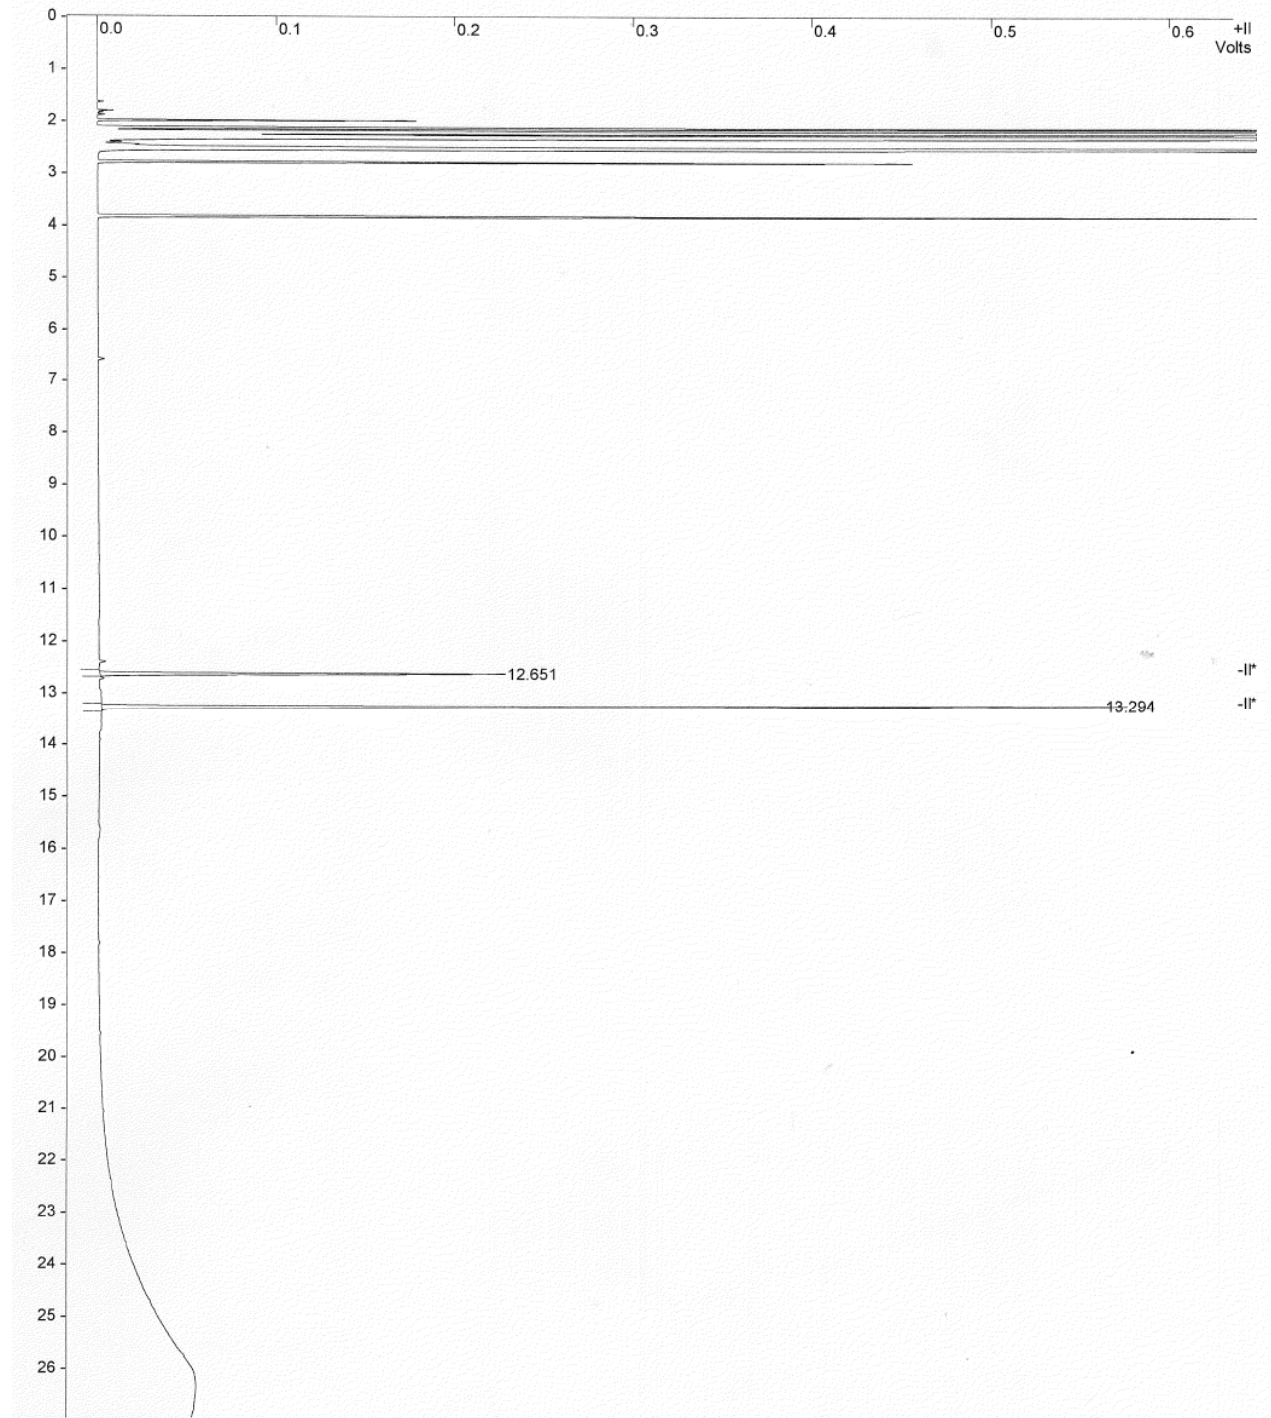

| Peak No. | Peak Name | Result ( ) | Ret. Time (min) | Time Offset (min) | Area (counts) | Sep. Code | Width 1/2 (sec) | Status Codes |
|----------|-----------|------------|-----------------|-------------------|---------------|-----------|-----------------|--------------|
| 1        |           | 28.1073    | 12.651          | 0.000             | 516295        | BB        | 2.1             |              |
| 2        |           | 71.8927    | 13.294          | 0.000             | 1320577       | BB        | 2.2             |              |
| Totals:  |           | 100.0000   |                 | 0.000             | 1836872       |           |                 |              |

$^1\text{H}$  NMR spectrum of **10a** (400 MHz,  $\text{C}_6\text{D}_6$ )

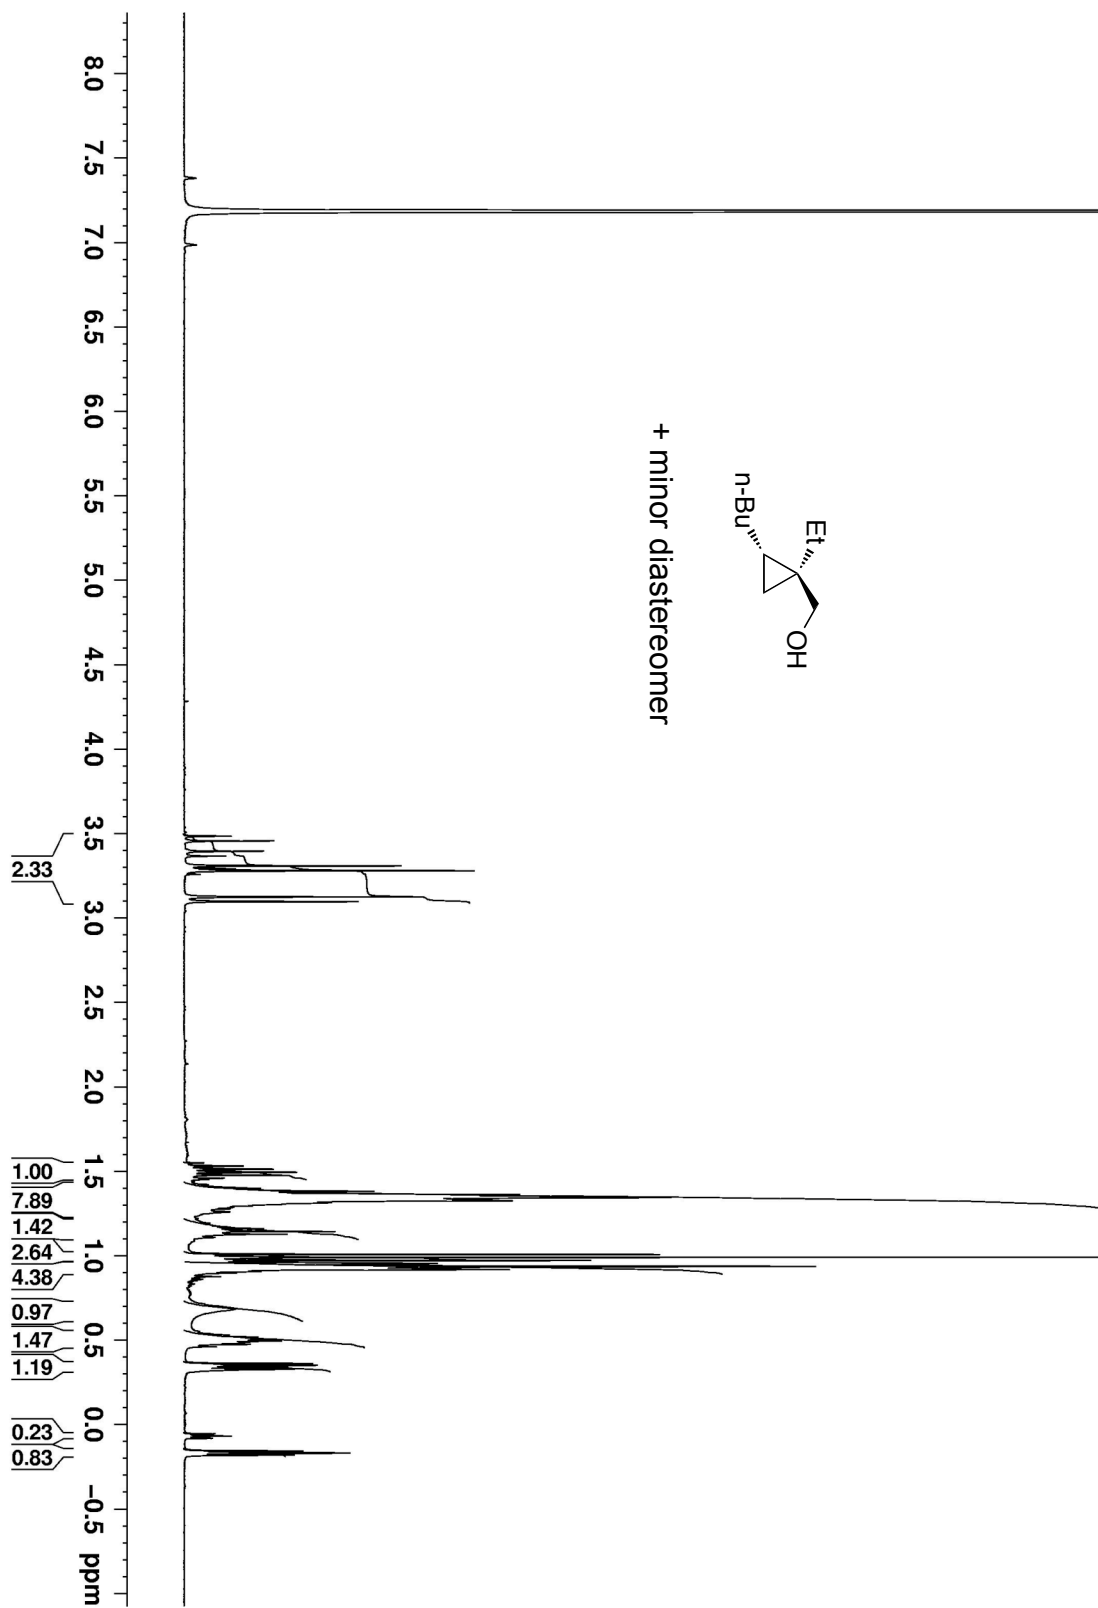



$^{13}\text{C}$  NMR spectrum of **10a** (100 MHz,  $\text{C}_6\text{D}_6$ )

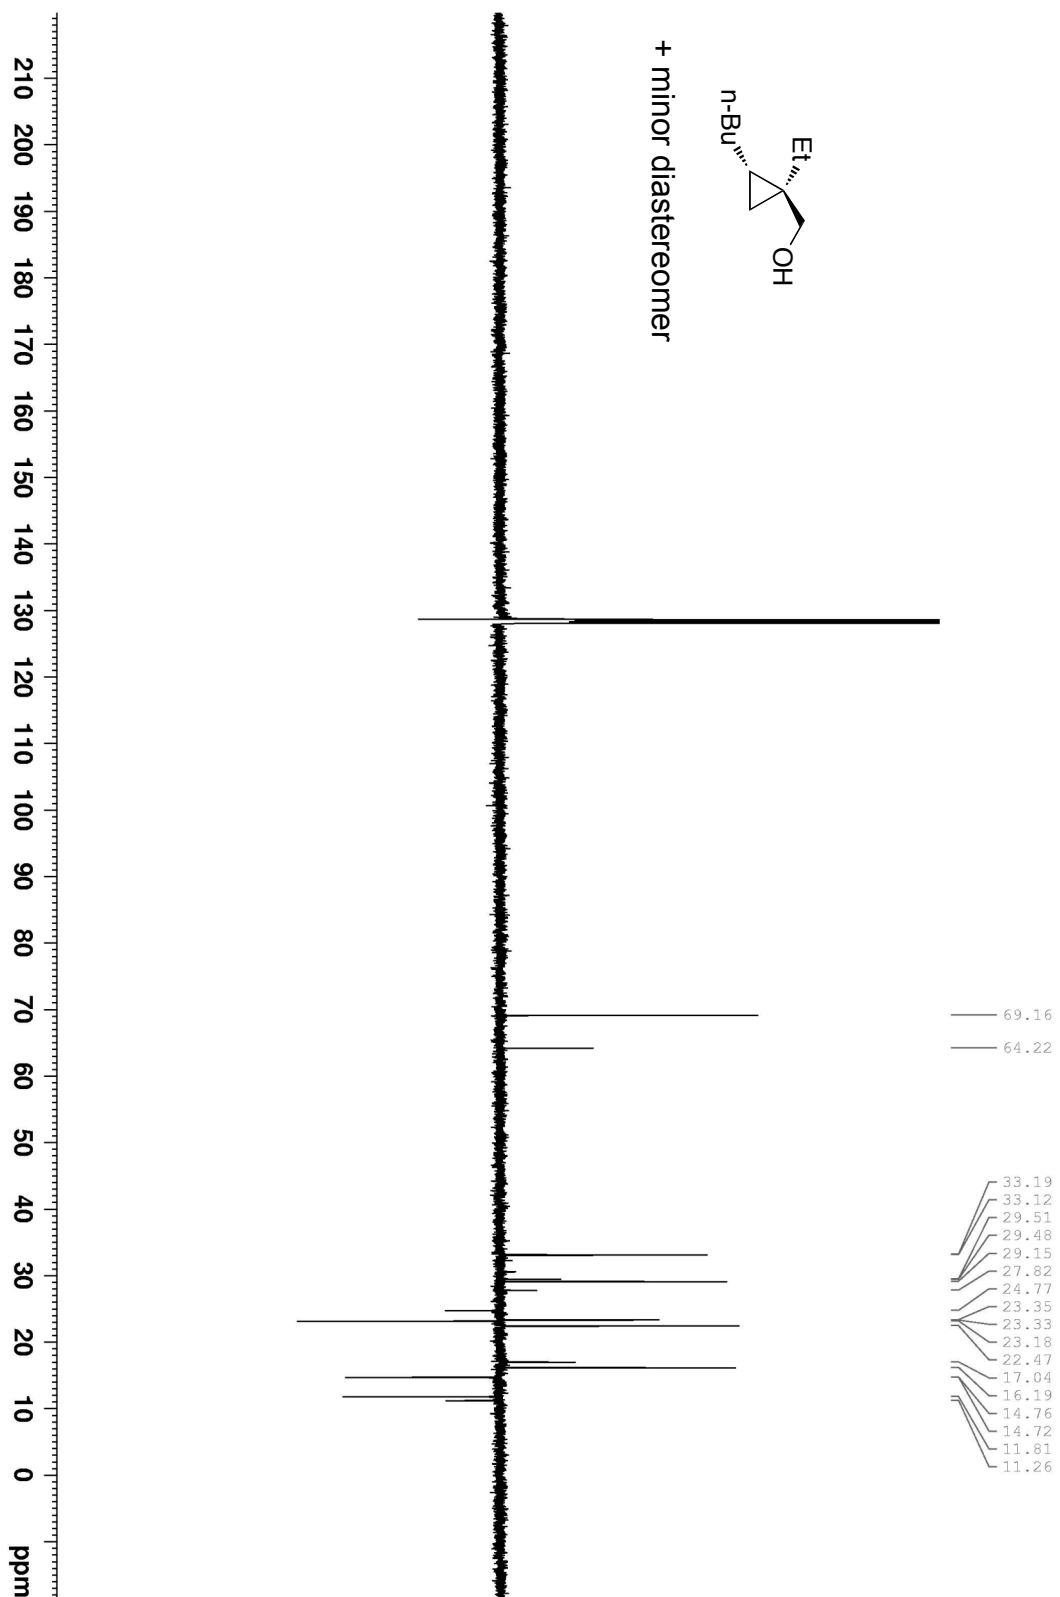

GC trace of Enantioselective **10a**

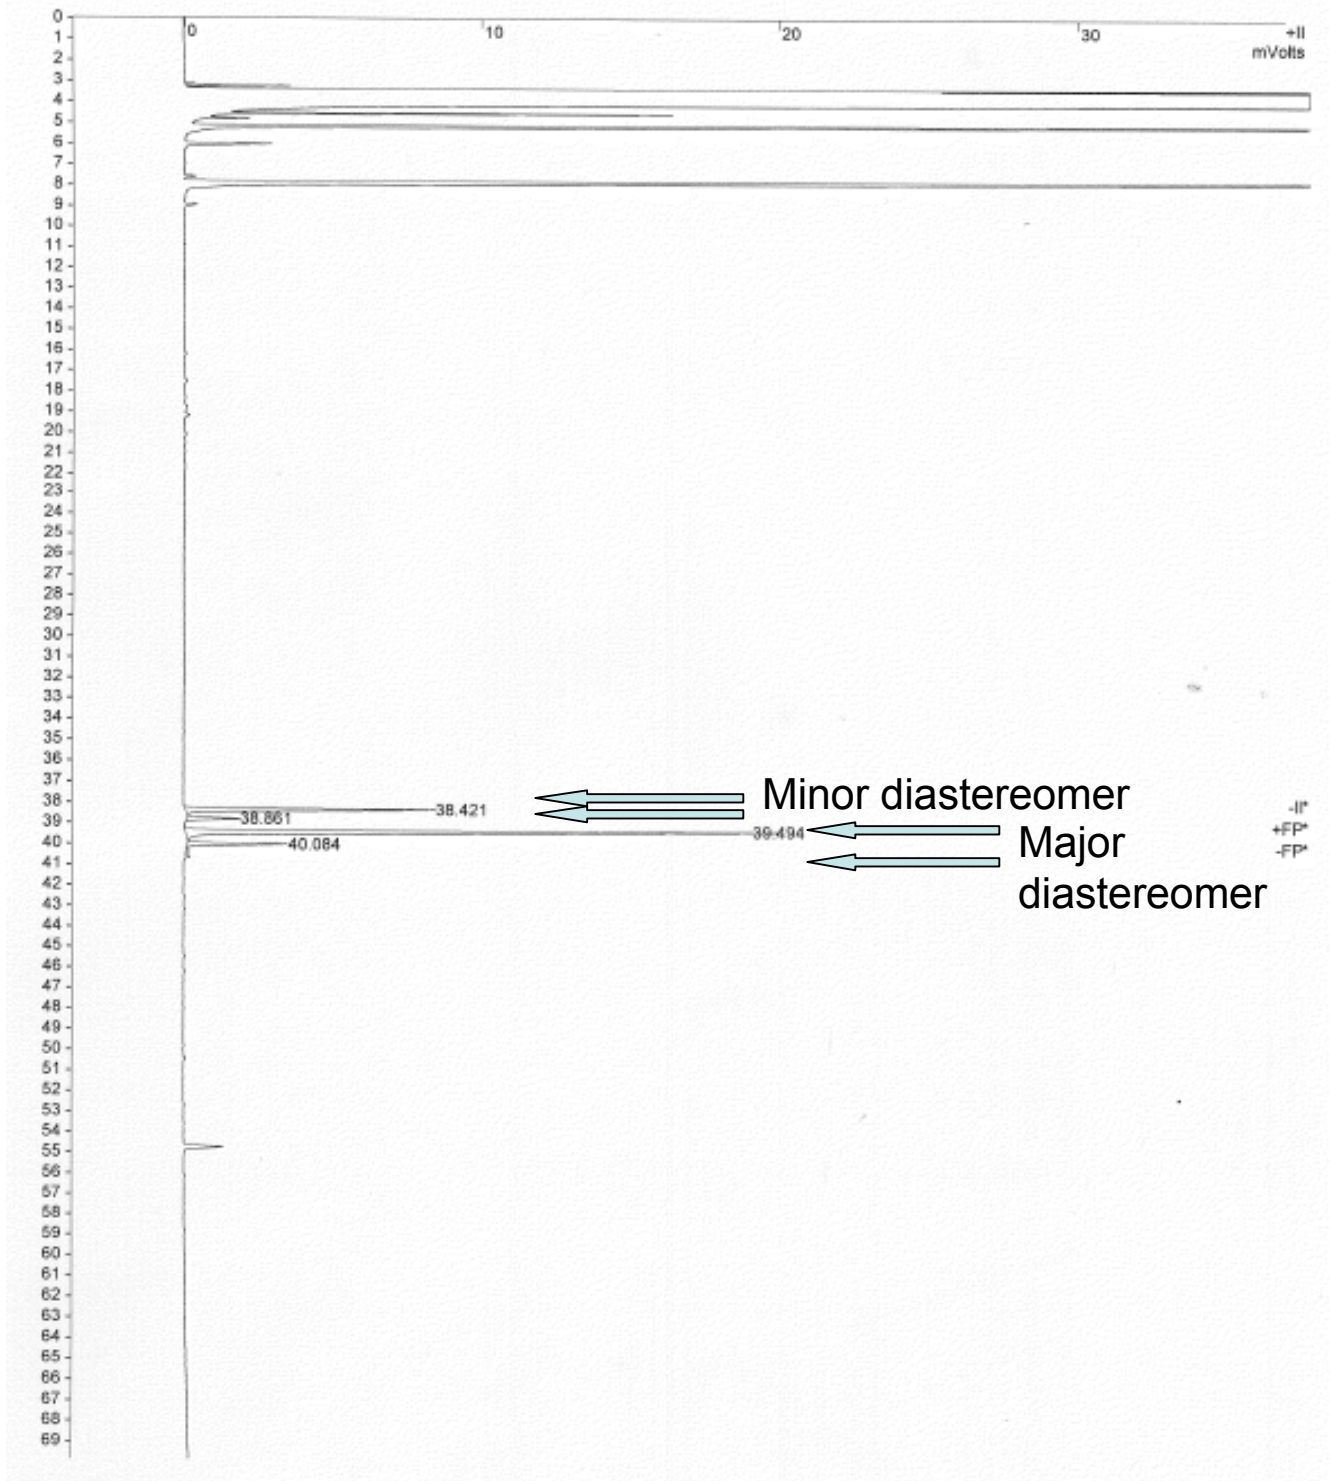

| Peak No. | Peak Name | Result ( ) | Ret. Time (min) | Time Offset (min) | Area (counts) | Sep. Code | Width 1/2 (sec) | Status Codes |
|----------|-----------|------------|-----------------|-------------------|---------------|-----------|-----------------|--------------|
| 1        |           | 24.4056    | 38.421          | 0.000             | 62228         | BB        | 6.8             |              |
| 2        |           | 5.2013     | 38.861          | 0.000             | 13262         | BB        | 6.7             |              |
| 3        |           | 60.6647    | 39.494          | 0.000             | 154679        | BB        | 7.0             |              |
| 4        |           | 9.7284     | 40.084          | 0.000             | 24805         | BB        | 6.8             |              |
| Totals:  |           | 100.0000   |                 | 0.000             | 254974        |           |                 |              |

GC trace of **10a** catalyzed with  $\text{Rh}_2(\text{R-PTTL})_3(\text{TPA})$  catalyzed instead of with  $\text{Rh}_2(\text{S-PTTL})_3(\text{TPA})$  to show the opposite trend in enantioselectivity.

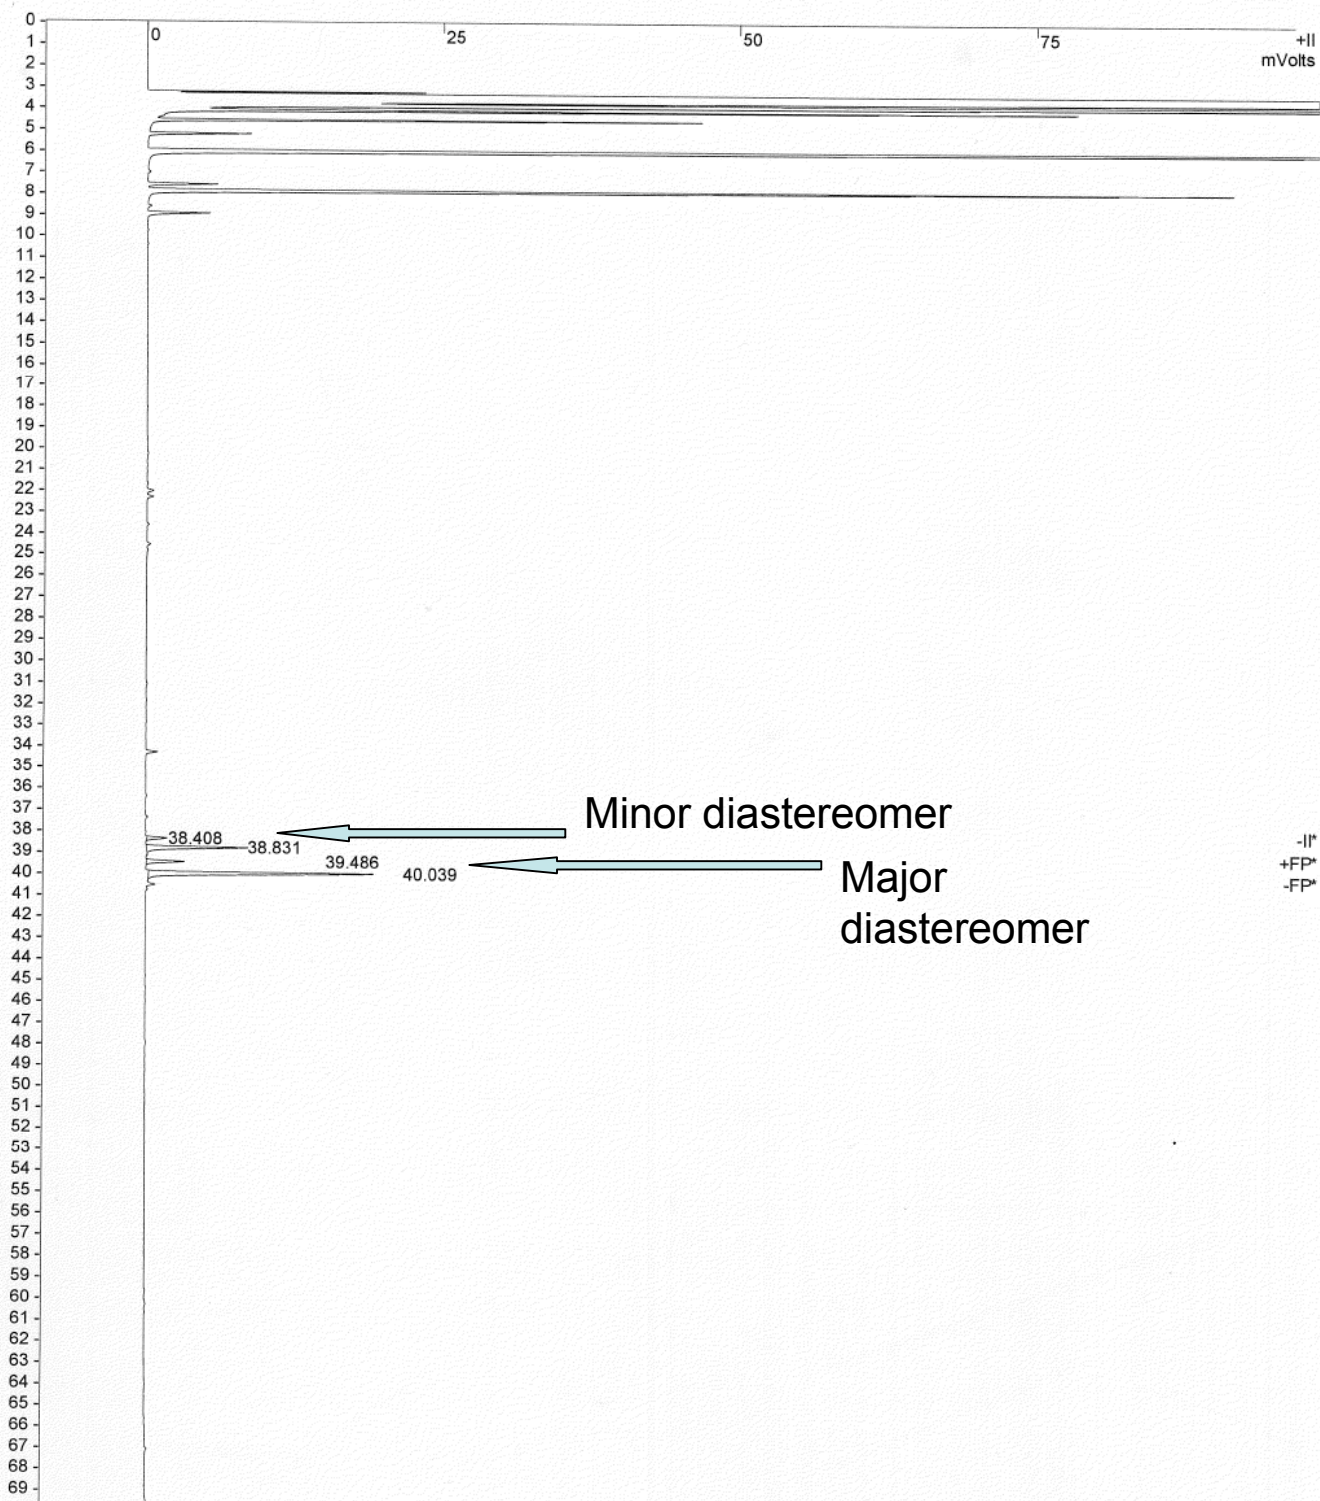

| Peak No. | Peak Name | Result ( ) | Ret. Time (min) | Time Offset (min) | Area (counts) | Sep. Code | Width 1/2 (sec) | Status Codes |
|----------|-----------|------------|-----------------|-------------------|---------------|-----------|-----------------|--------------|
| 1        |           | 4.6050     | 38.408          | 0.000             | 11153         | BB        | 6.2             |              |
| 2        |           | 26.4122    | 38.831          | 0.000             | 63972         | BB        | 6.7             |              |
| 3        |           | 9.4794     | 39.486          | 0.000             | 22960         | BB        | 6.6             |              |
| 4        |           | 59.5035    | 40.039          | 0.000             | 144121        | BB        | 7.0             |              |
| Totals:  |           | 100.0001   |                 | 0.000             | 242206        |           |                 |              |

$^1\text{H}$  NMR spectrum of **11** (400 MHz,  $\text{CDCl}_3$ )

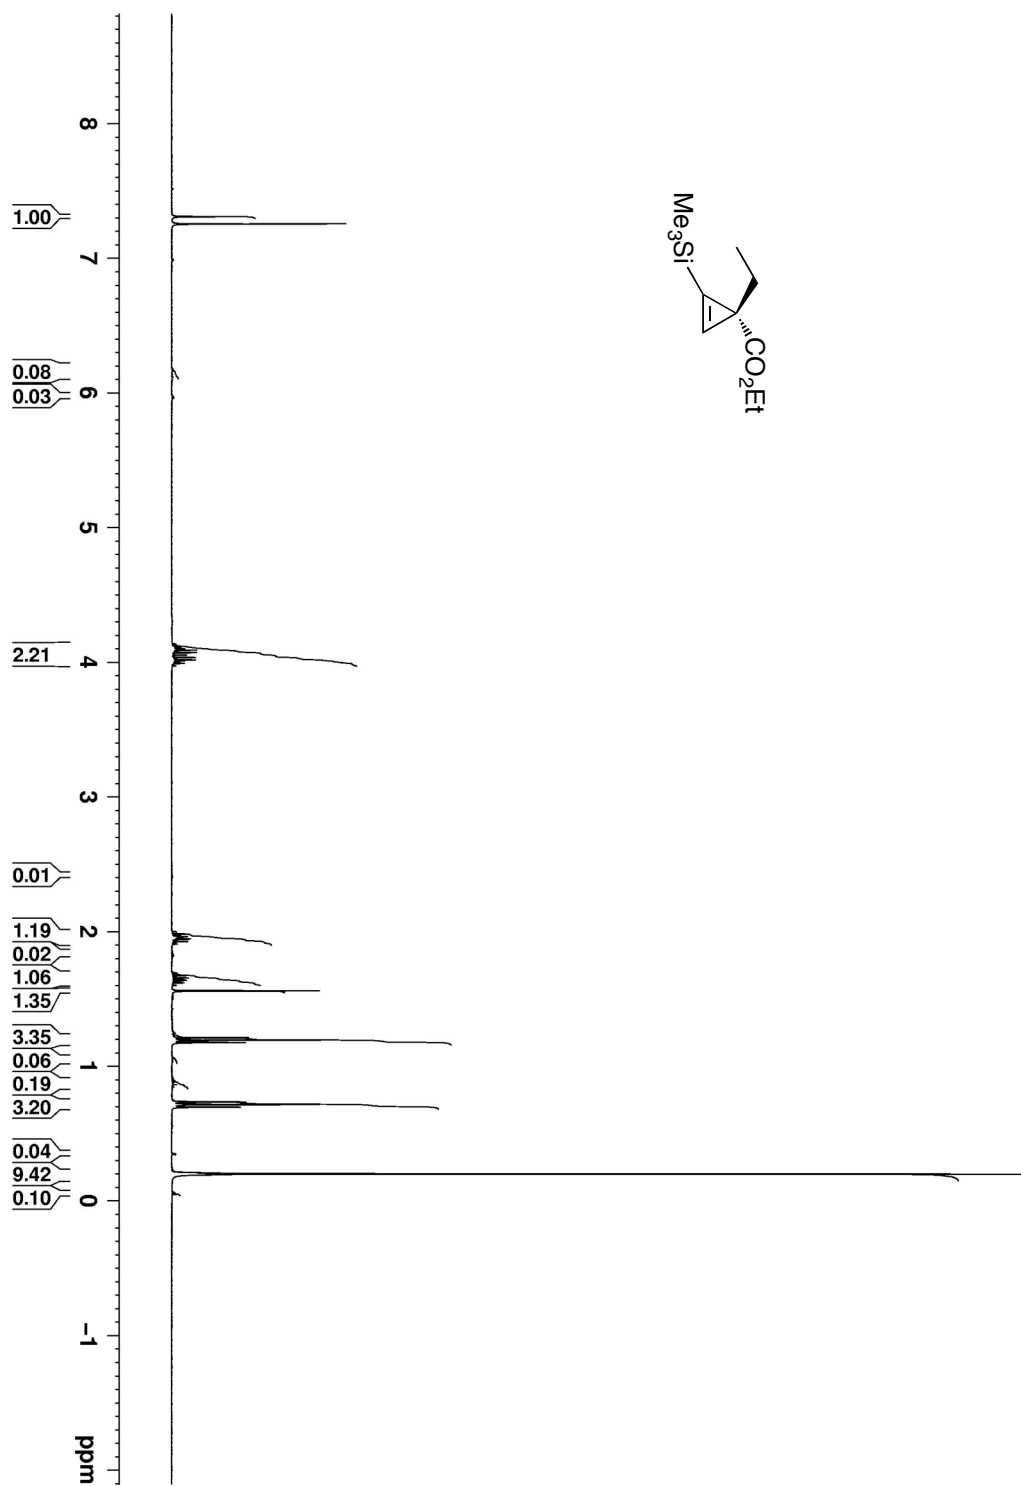



$^{13}\text{C}$  NMR spectrum of **11** (100 MHz,  $\text{CDCl}_3$ )

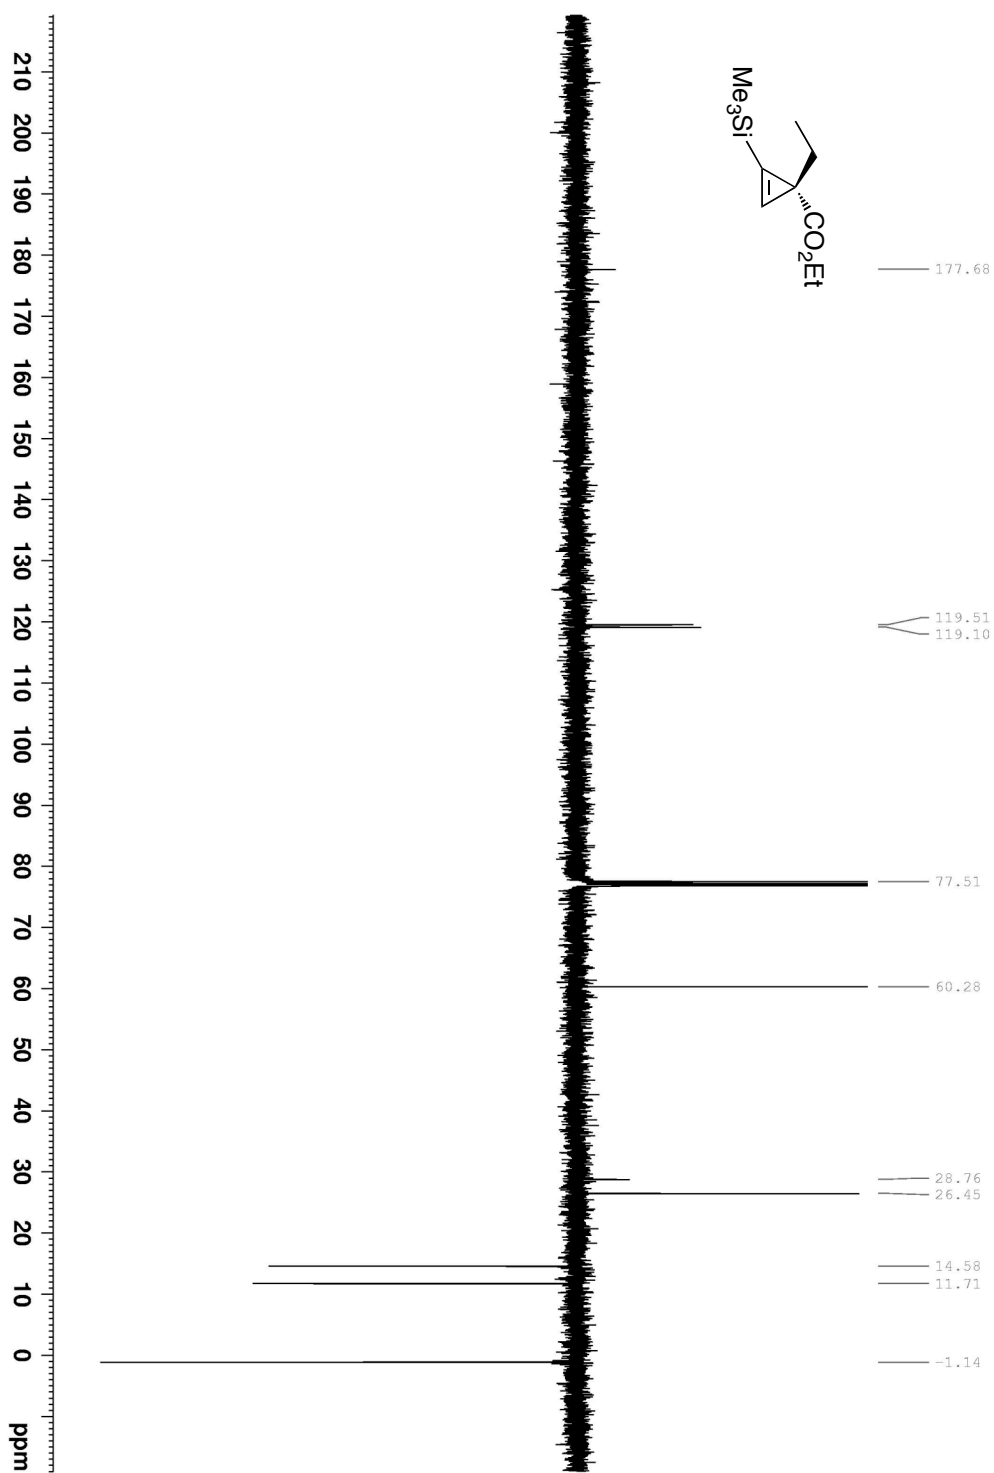

GC trace of racemic **11** (Chiralpak G-TA column, 200 °C injection, 50–180°C at 0.4°C per min., hold 20 min.)

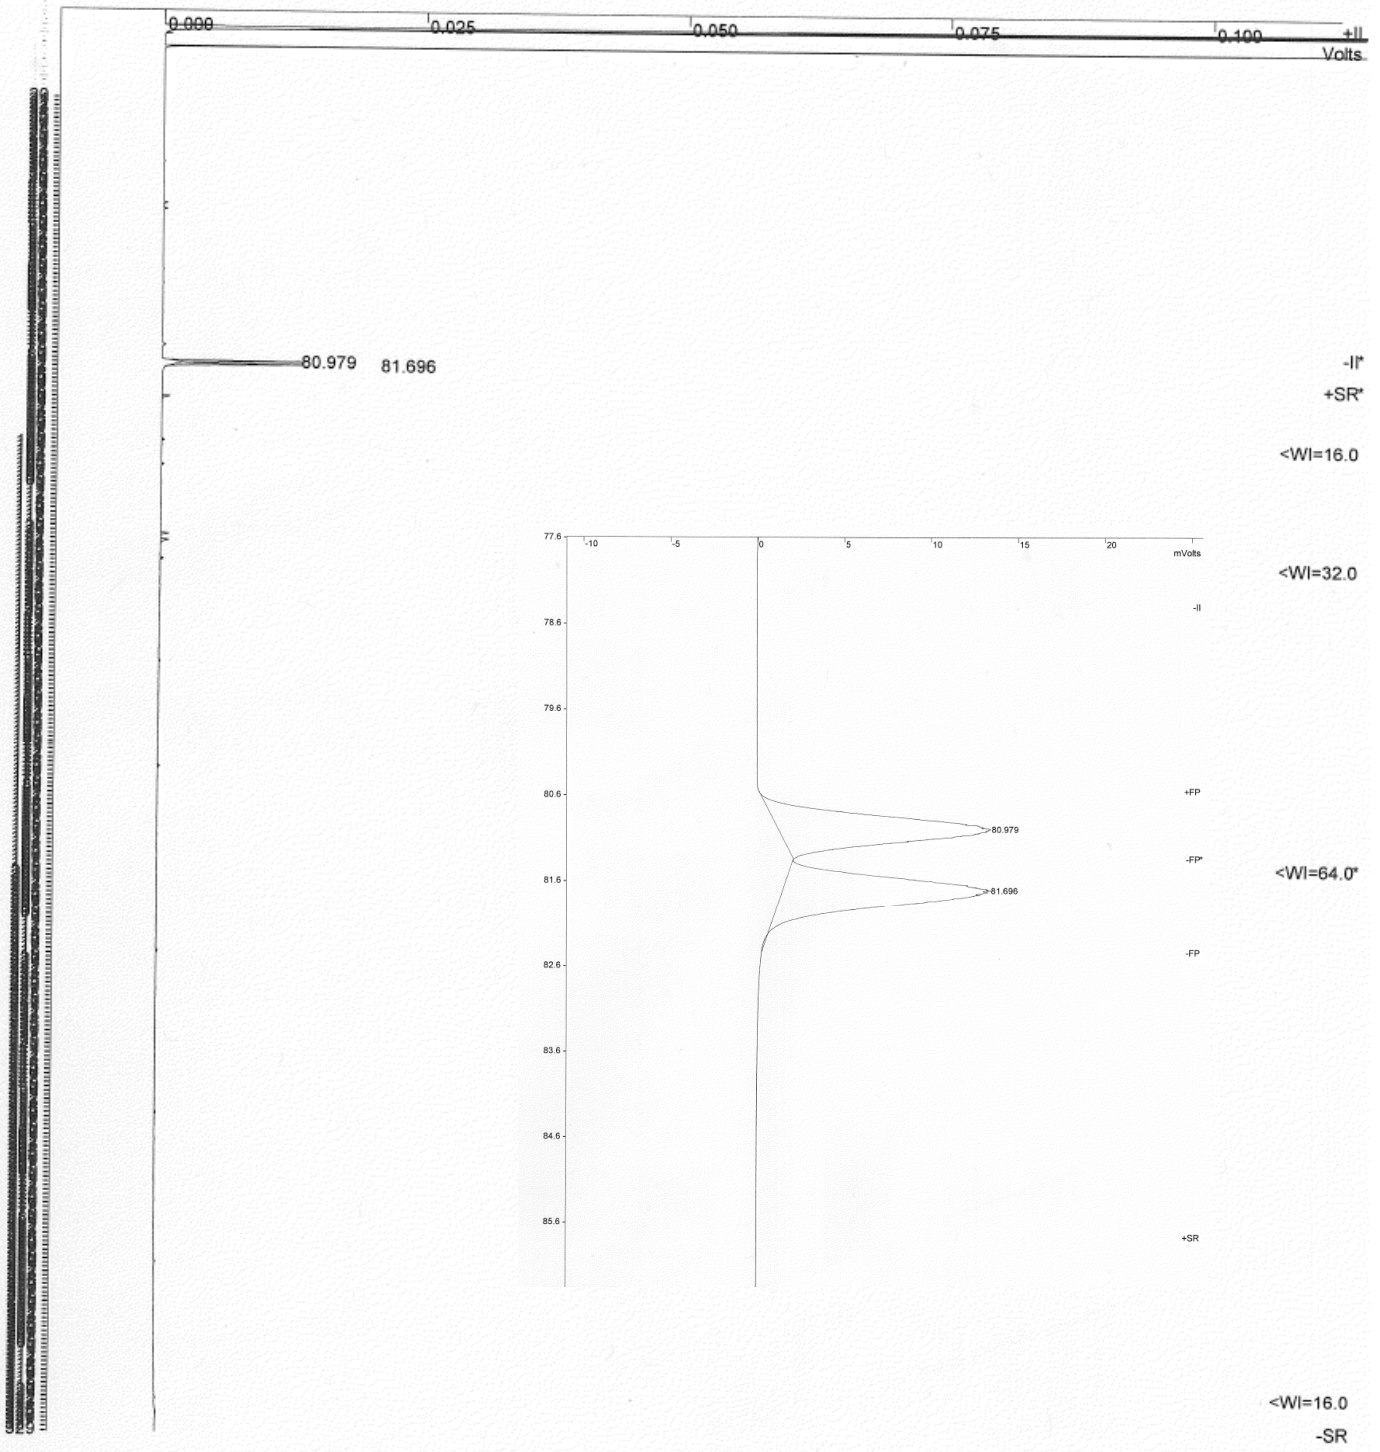

| Peak No. | Peak Name | Result ( ) | Ret. Time (min) | Time Offset (min) | Area (counts) | Sep. Code | Width 1/2 (sec) | Status Codes |
|----------|-----------|------------|-----------------|-------------------|---------------|-----------|-----------------|--------------|
| 1        |           | 48.8452    | 80.979          | 0.000             | 245929        | BB        | 20.8            |              |
| 2        |           | 51.1548    | 81.696          | 0.000             | 257557        | BB        | 19.8            |              |
| Totals:  |           | 100.0000   |                 | 0.000             | 503486        |           |                 |              |

GC trace of enantioselective **11** (Chiralpak G-TA column, 200 °C injection, 50–180 °C at 0.4 °C per min., hold 20 min.)

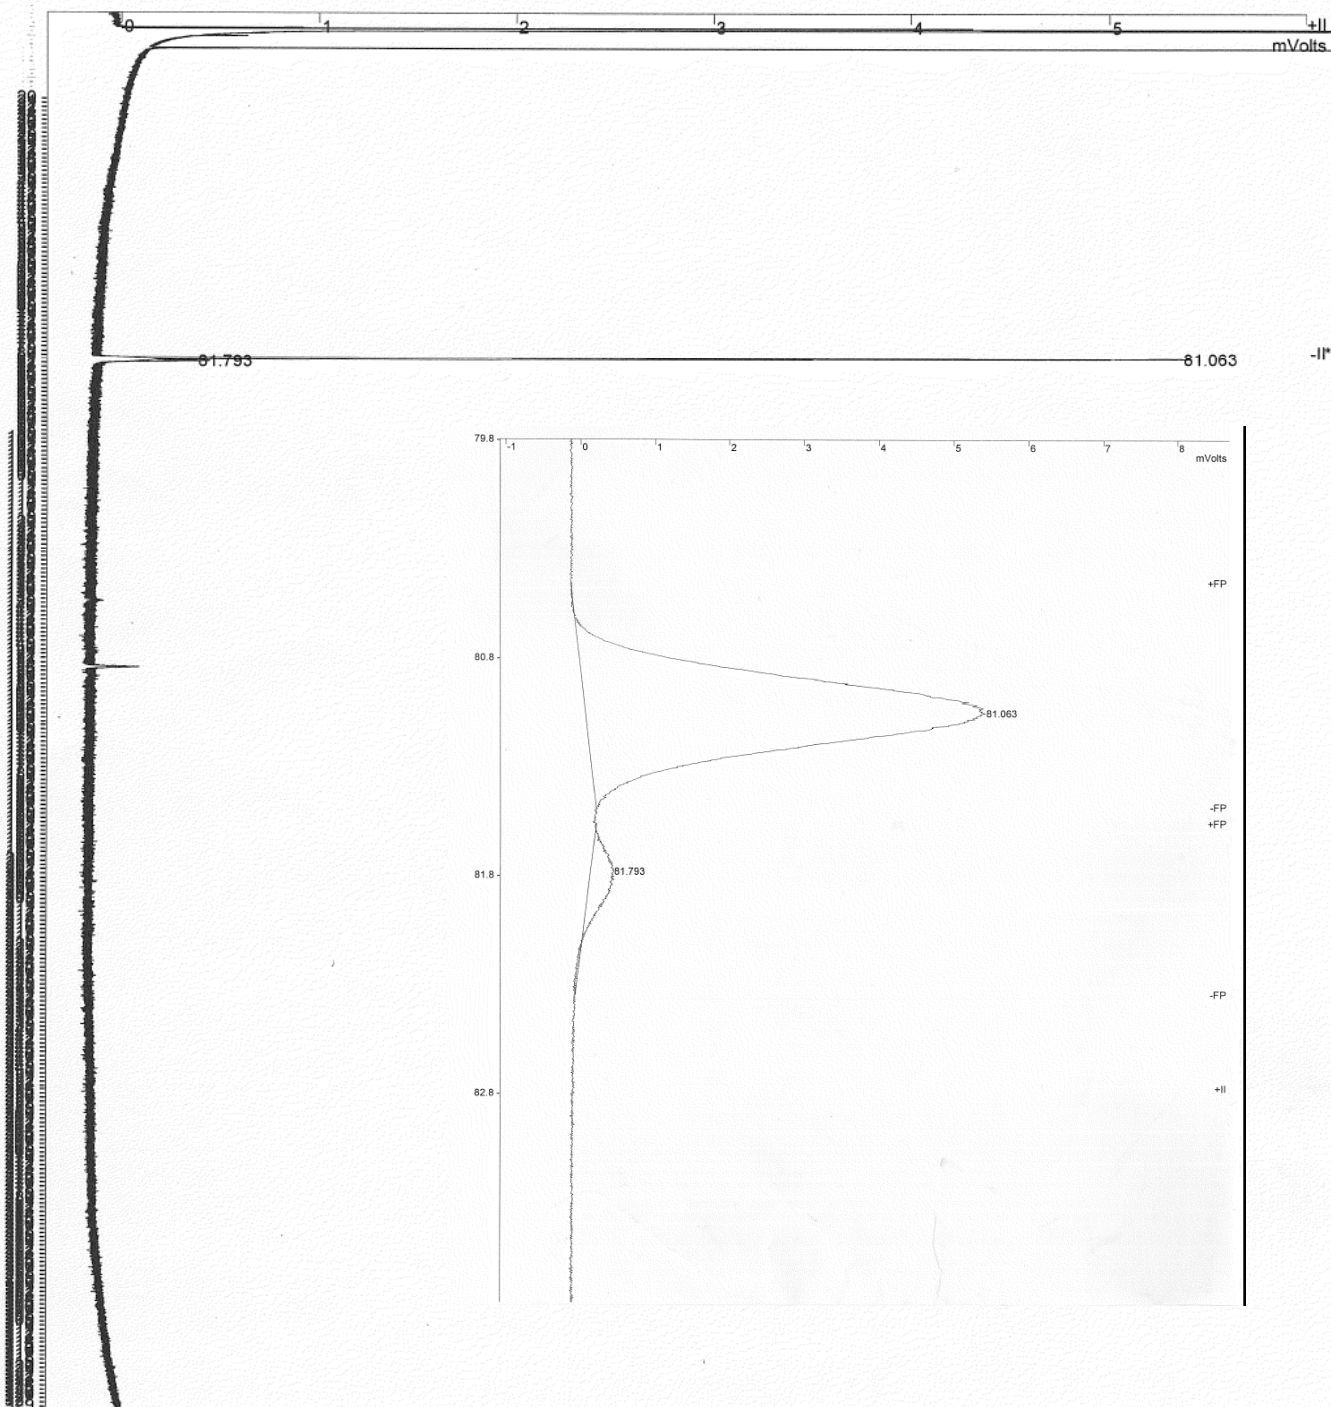

| Peak No. | Peak Name | Result ( ) | Ret. Time (min) | Time Offset (min) | Area (counts) | Sep. Code | Width 1/2 (sec) | Status Codes |
|----------|-----------|------------|-----------------|-------------------|---------------|-----------|-----------------|--------------|
| 1        |           | 95.8060    | 81.063          | 0.000             | 114578        | BB        | 20.7            |              |
| 2        |           | 4.1940     | 81.793          | 0.000             | 5016          | BB        | 12.5            |              |
| Totals:  |           | 100.0000   |                 | 0.000             | 119594        |           |                 |              |

$^1\text{H}$  NMR spectrum of **12** (400 MHz,  $\text{CDCl}_3$ )

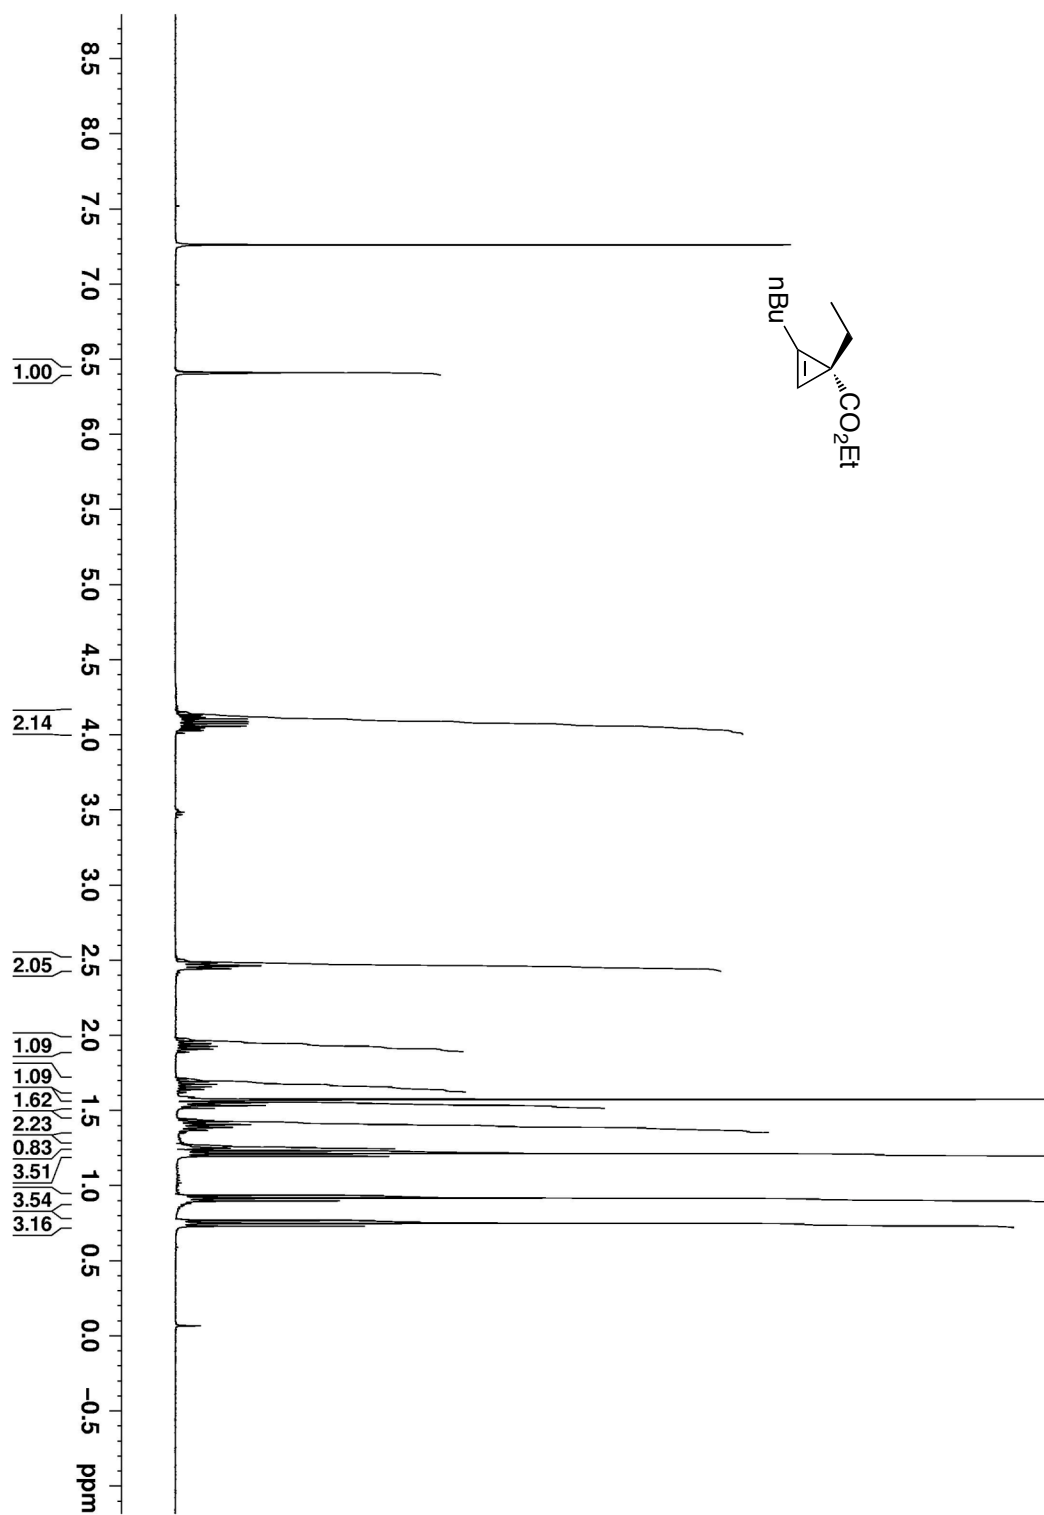



$^{13}\text{C}$  NMR spectrum of **12** (100 MHz,  $\text{CDCl}_3$ )

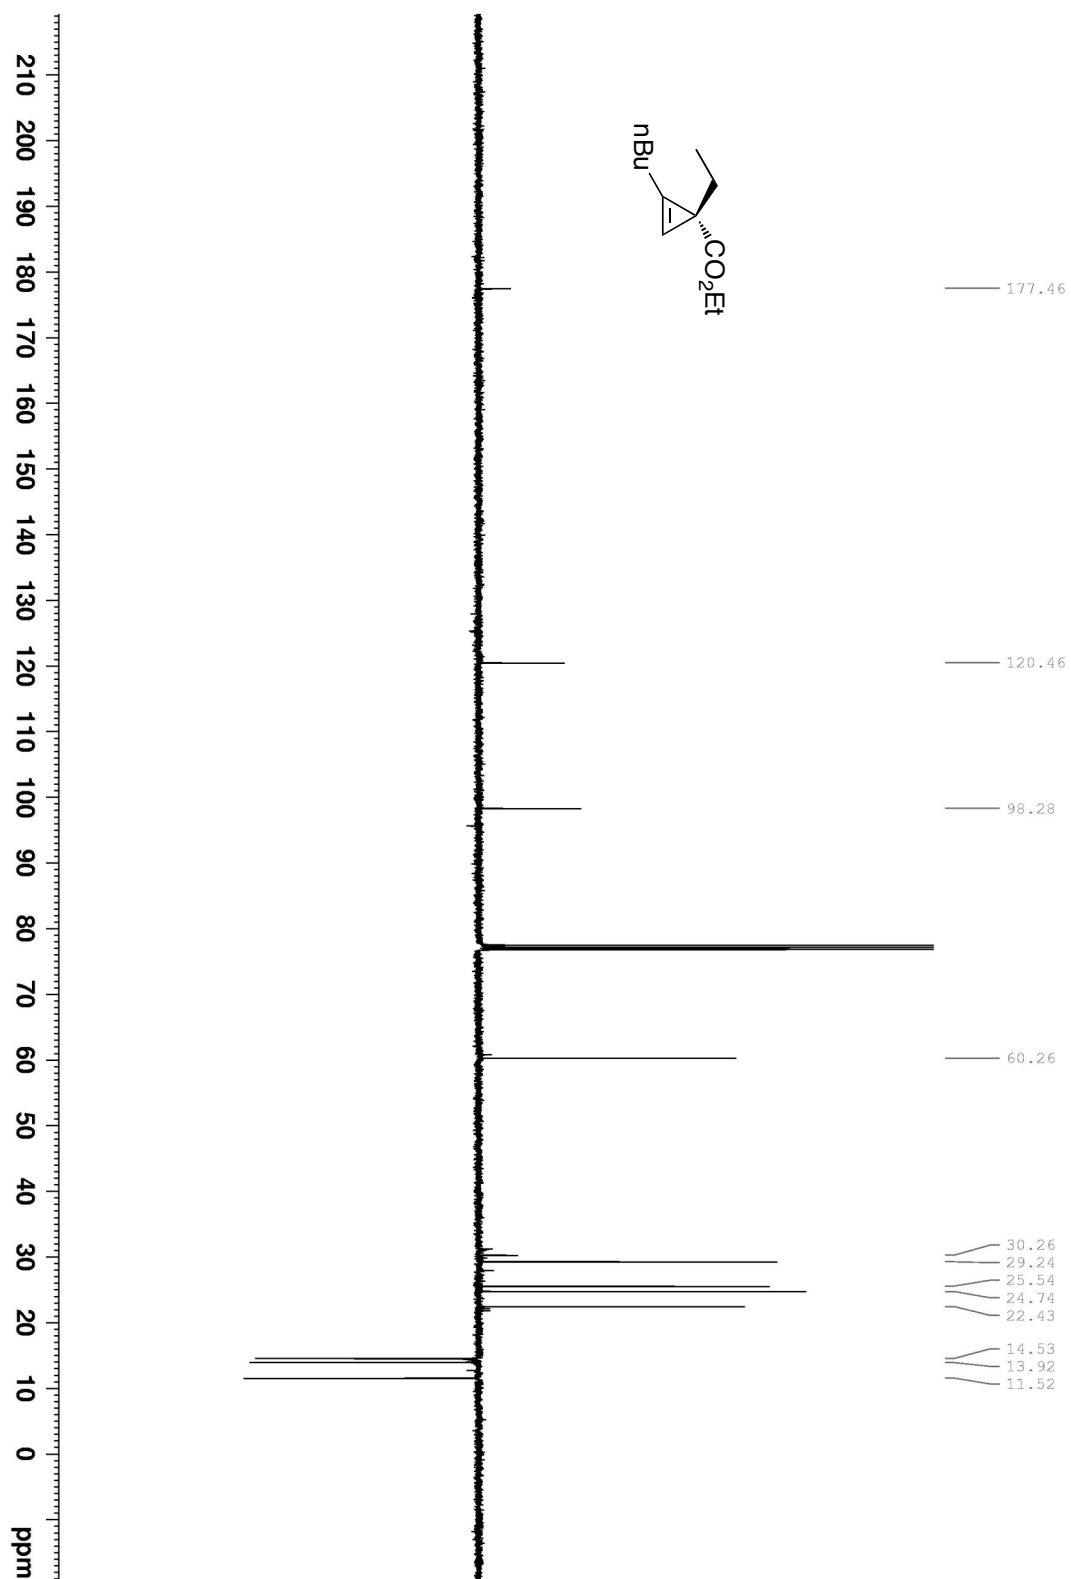

GC trace of racemic **12** (Chiralpak G-TA column, 200 °C injection, 50–180°C at 0.5°C per min., hold 20 min.)

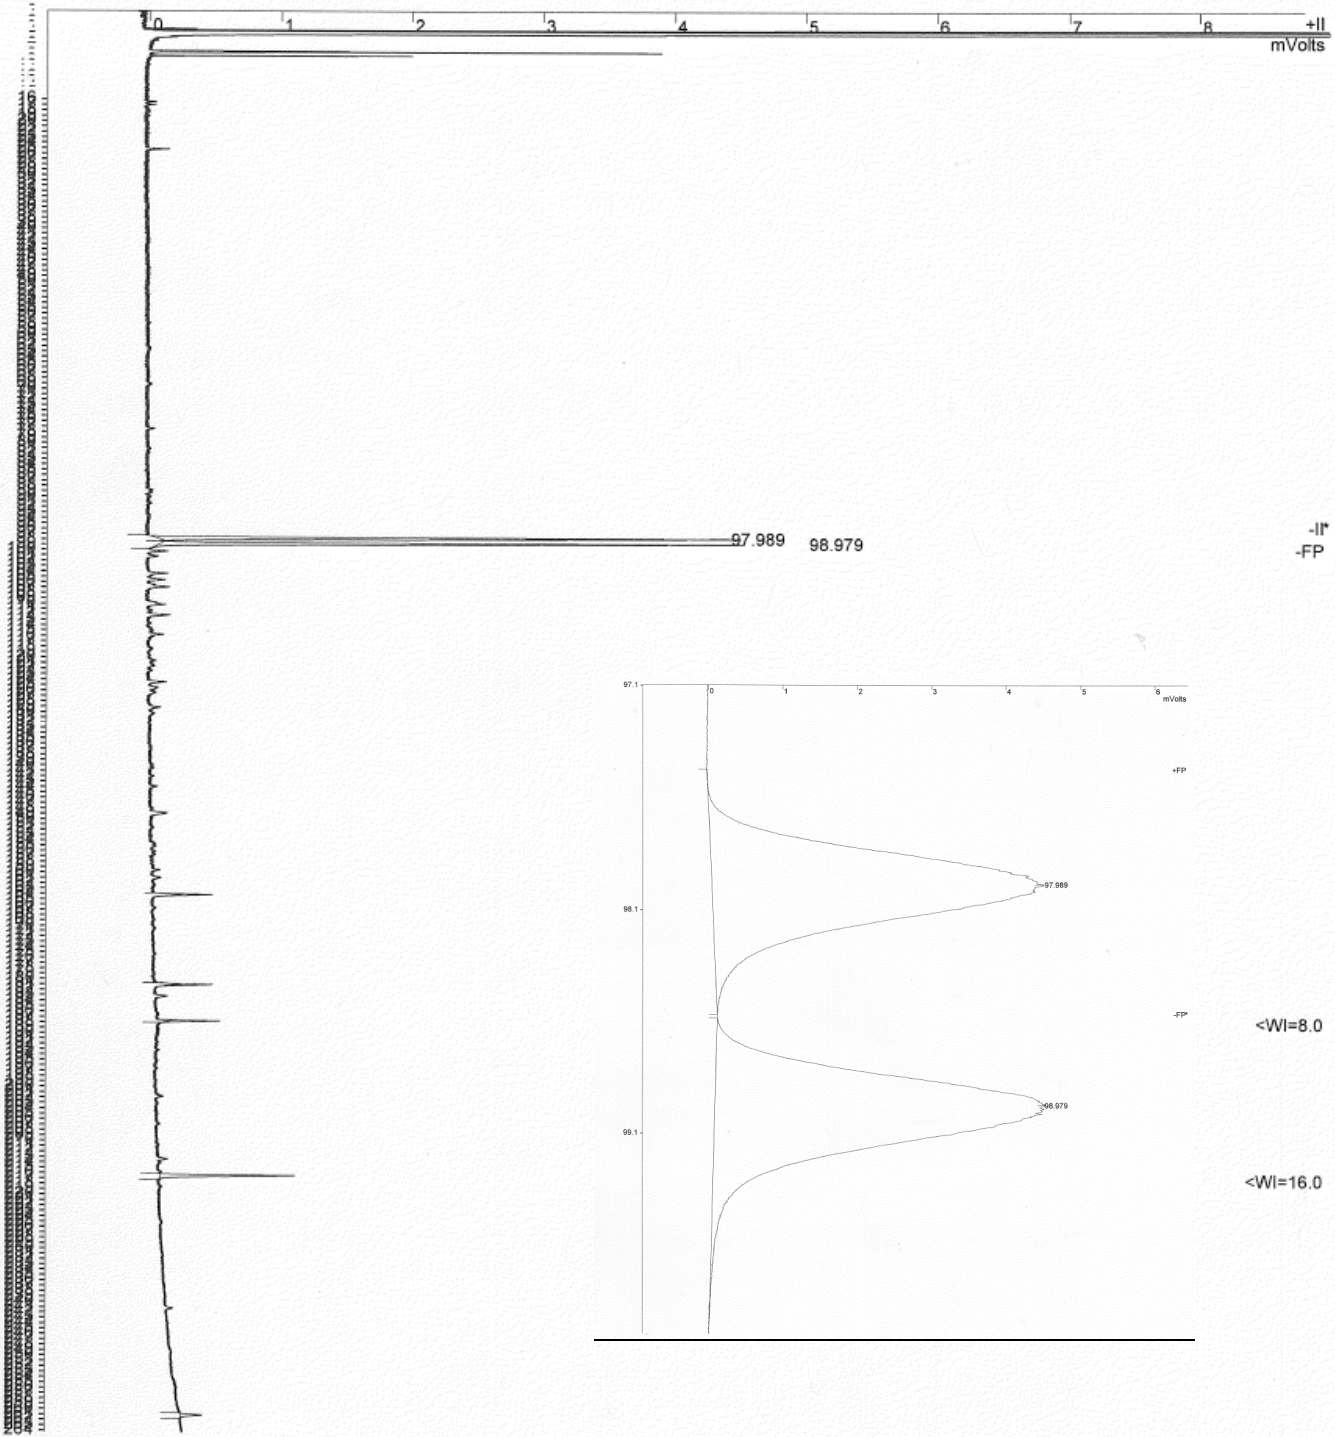

| Peak No. | Peak Name | Result ( ) | Ret. Time (min) | Time Offset (min) | Area (counts) | Sep. Code | Width 1/2 (sec) | Status Codes |
|----------|-----------|------------|-----------------|-------------------|---------------|-----------|-----------------|--------------|
| 1        |           | 49.4335    | 97.989          | 0.000             | 91249         | BB        | 19.3            |              |
| 2        |           | 50.5665    | 98.979          | 0.000             | 93340         | BB        | 19.1            |              |
| Totals:  |           | 100.0000   |                 | 0.000             | 184589        |           |                 |              |

Enantioselective GC trace of **12** (Chiralpak G-TA column, 200 °C injection, 50–180°C at 0.5°C per min., hold 20 min.)

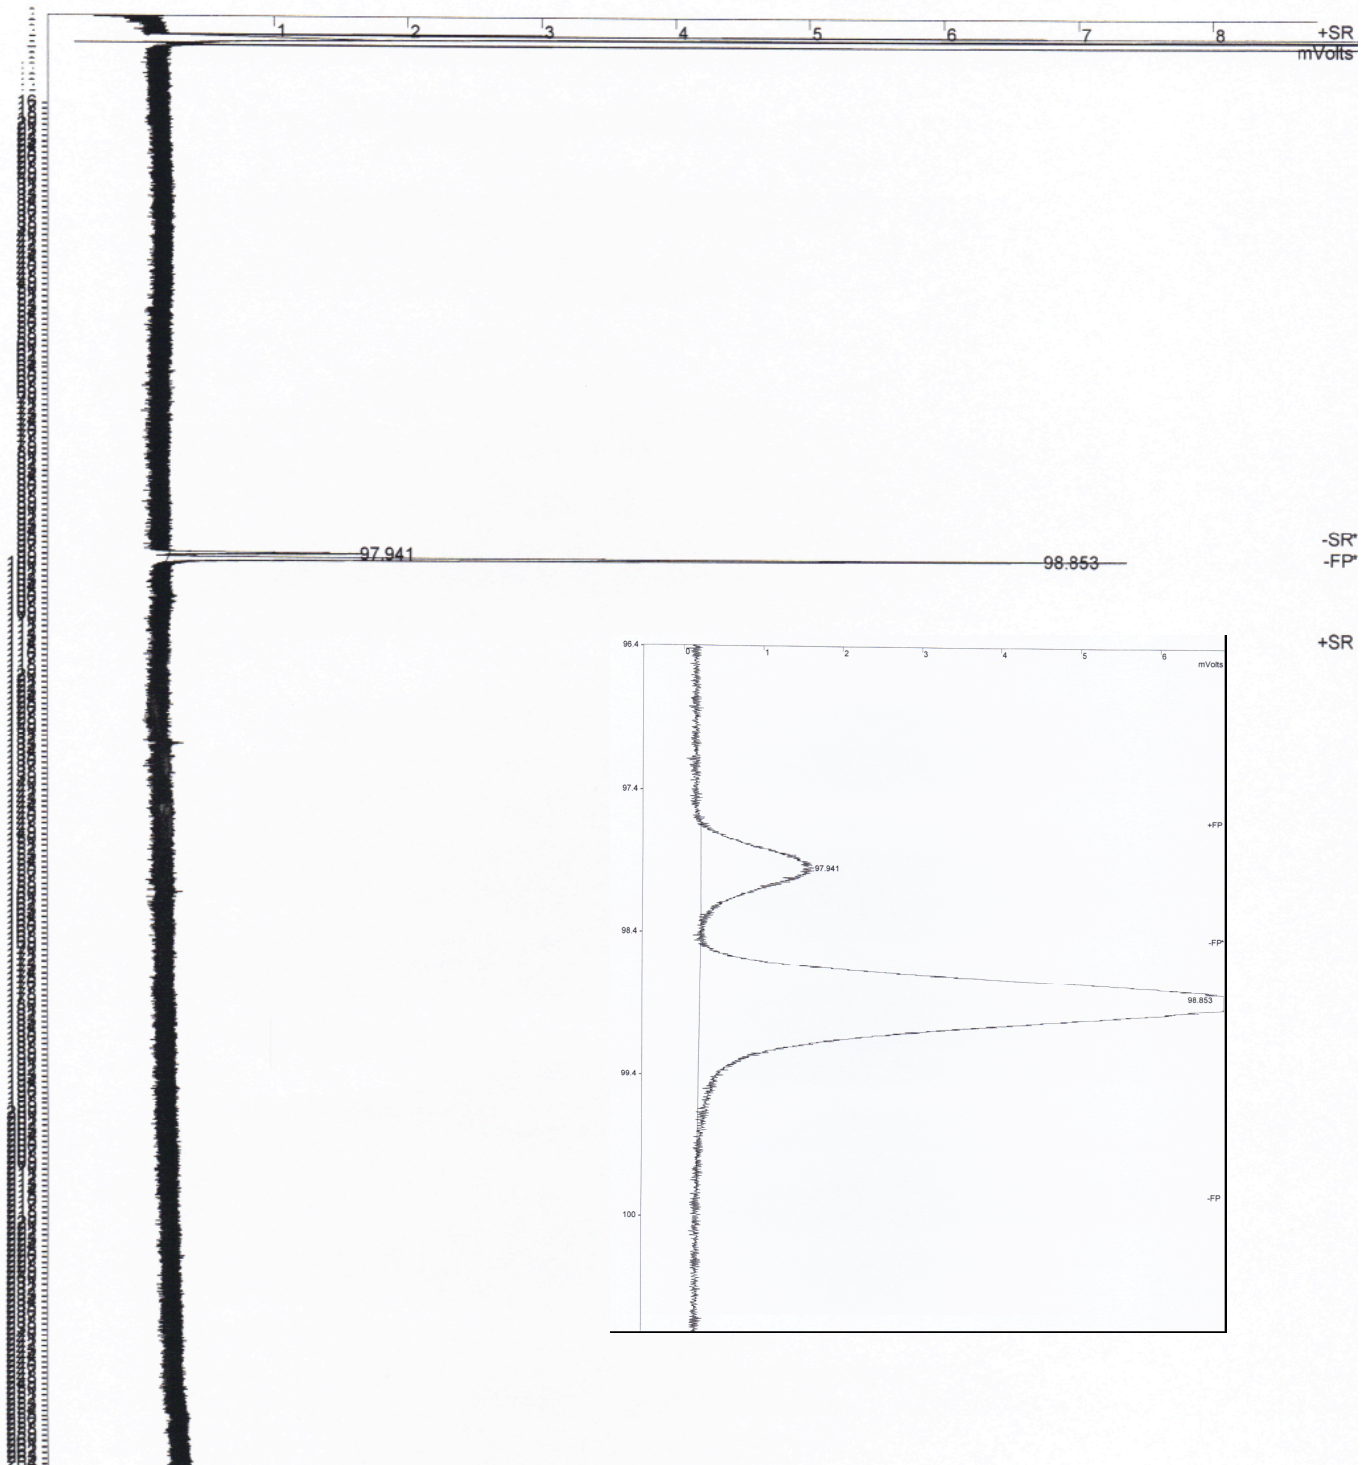

| Peak No. | Peak Name | Result ( ) | Ret. Time (min) | Time Offset (min) | Area (counts) | Sep. Code | Width 1/2 (sec) | Status Codes |
|----------|-----------|------------|-----------------|-------------------|---------------|-----------|-----------------|--------------|
| 1        |           | 14.0367    | 97.941          | 0.000             | 26609         | BB        | 17.3            |              |
| 2        |           | 85.9633    | 98.853          | 0.000             | 162956        | BB        | 20.8            |              |
| Totals:  |           | 100.0000   |                 | 0.000             | 189565        |           |                 |              |

$^1\text{H}$  NMR spectrum of **13** (400 MHz,  $\text{CDCl}_3$ )

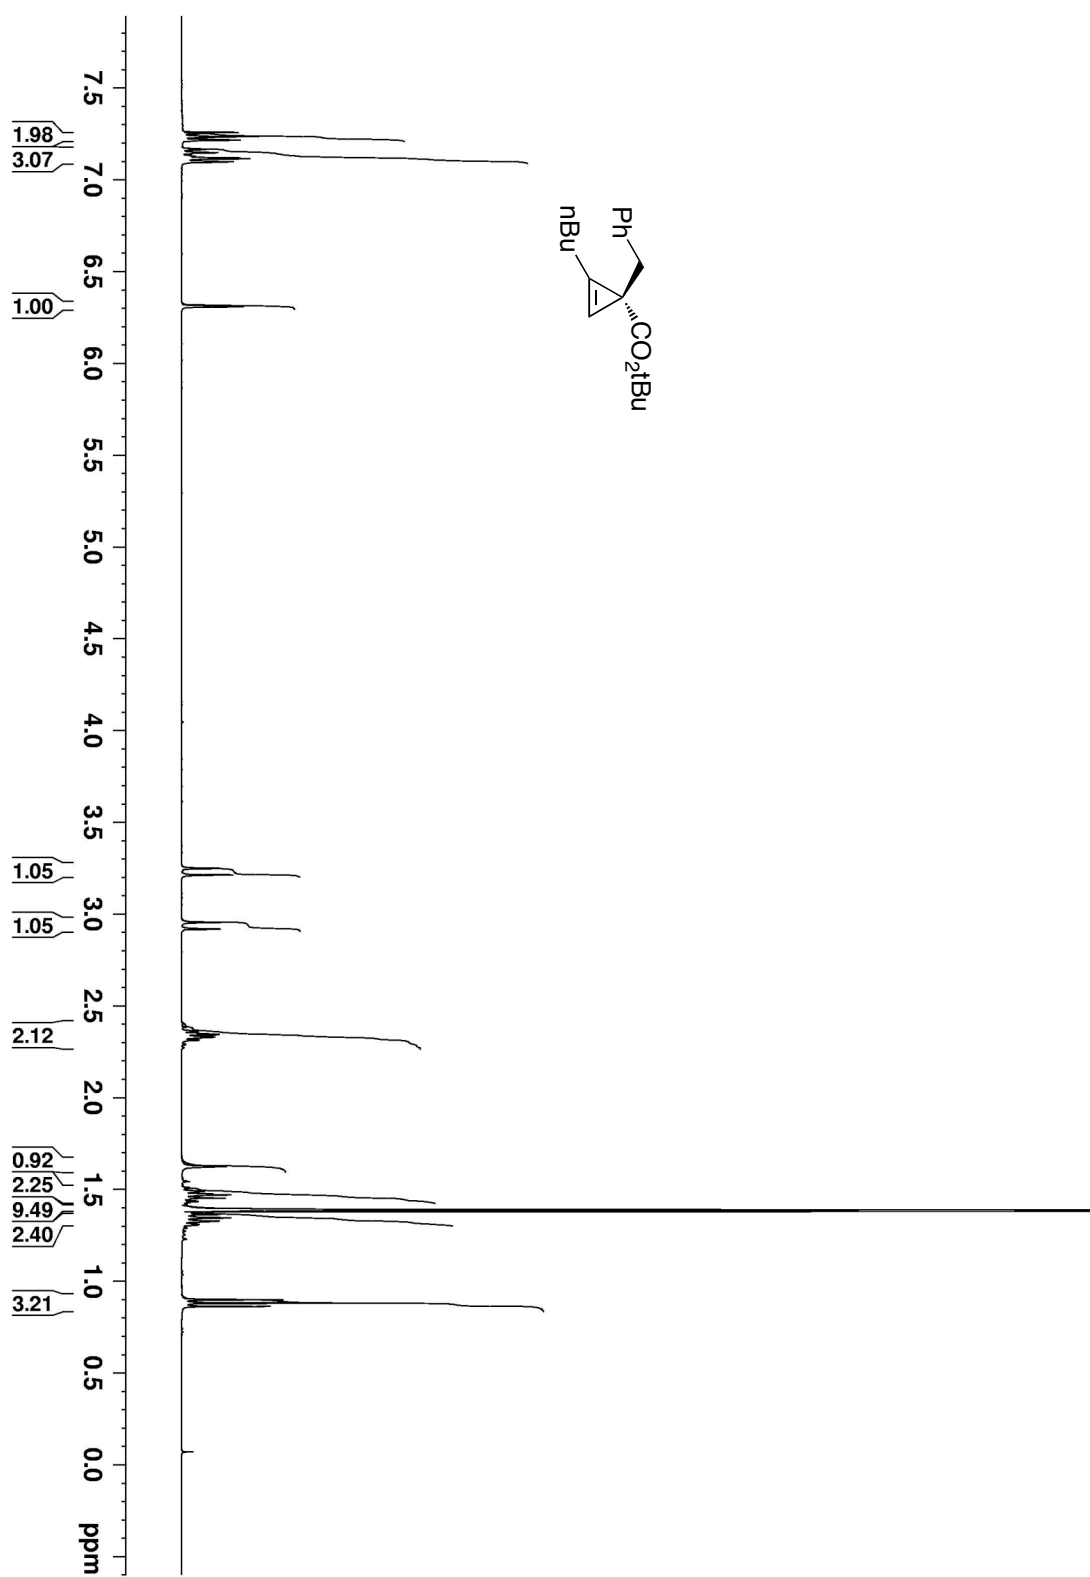



$^{13}\text{C}$  NMR spectrum of **13** (100 MHz,  $\text{CDCl}_3$ )

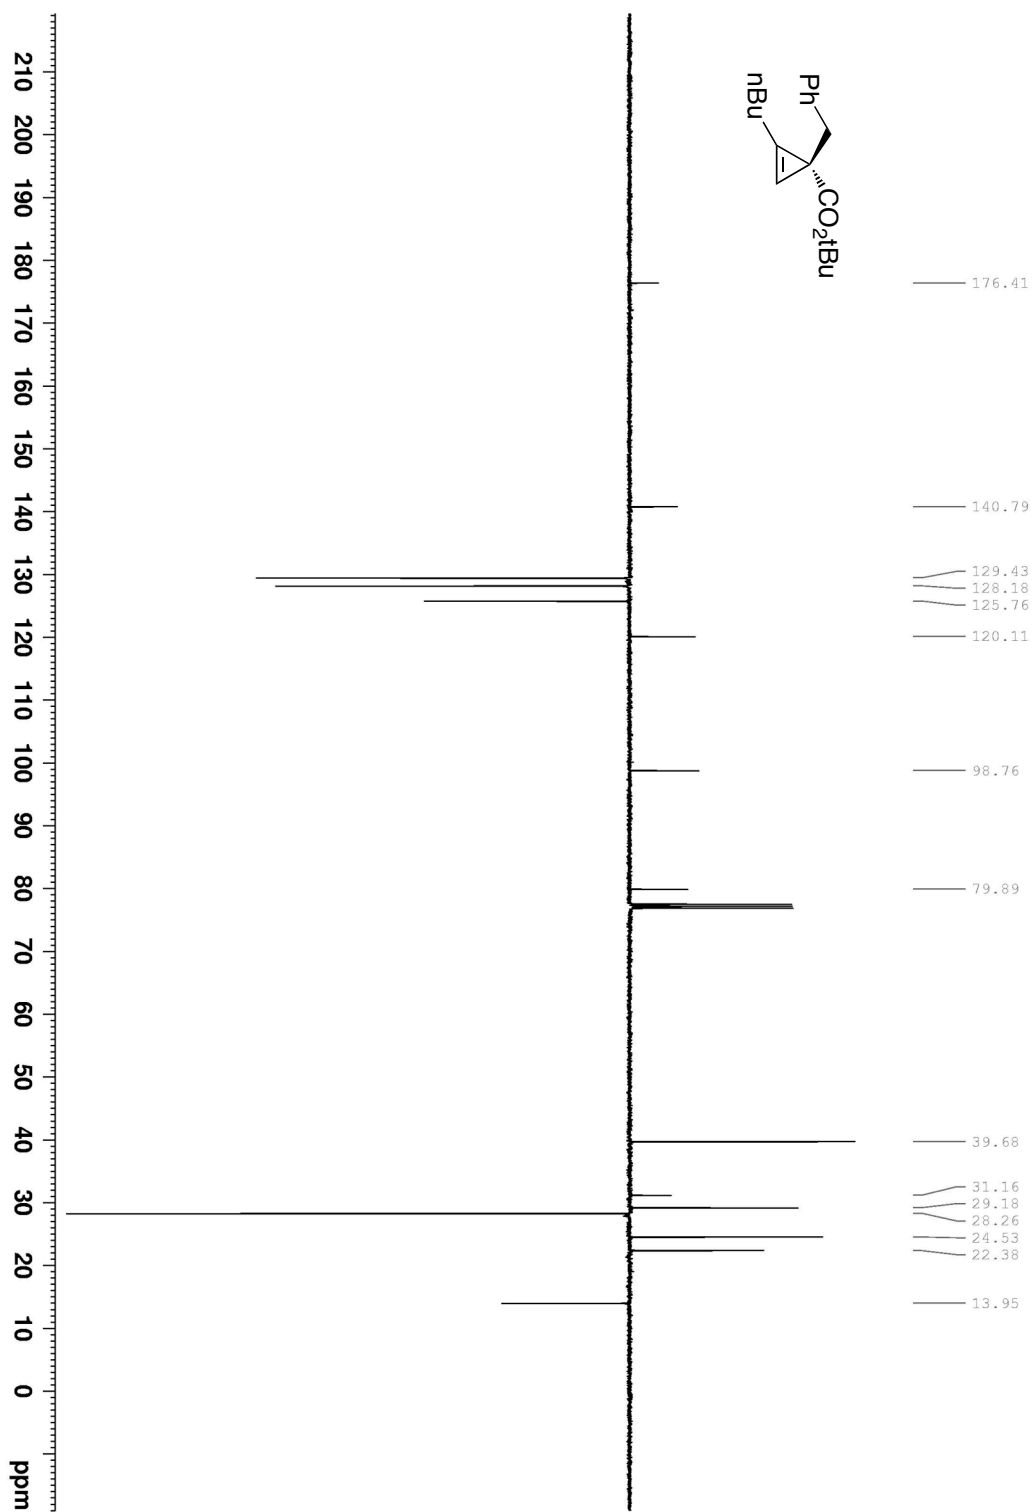

HPLC resolution of racemic **13** (Chiracel IB column, 99:1 hexanes:isopropanol, 1 mL/min, 220 nm)

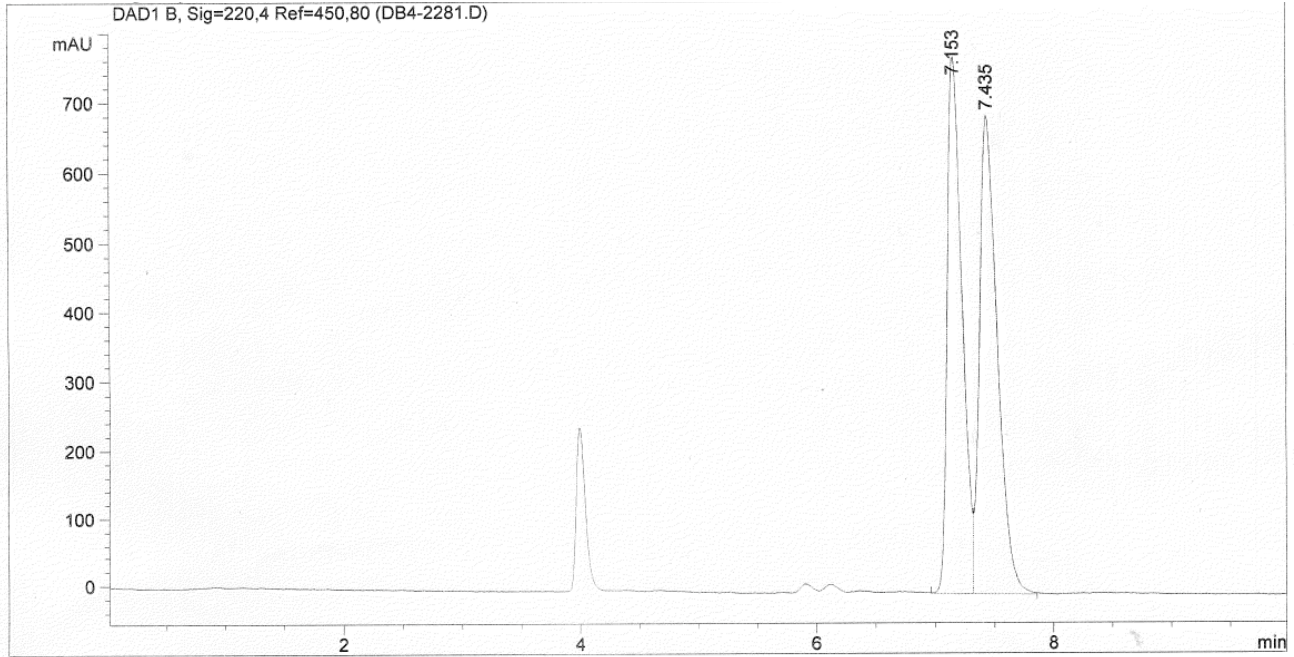

=====  
 Area Percent Report  
 =====

Sorted By : Signal  
 Multiplier : 1.0000  
 Dilution : 1.0000  
 Use Multiplier & Dilution Factor with ISTDs

Signal 1: DAD1 B, Sig=220,4 Ref=450,80

| Peak # | RetTime [min] | Type | Width [min] | Area [mAU*s] | Height [mAU] | Area %  |
|--------|---------------|------|-------------|--------------|--------------|---------|
| 1      | 7.153         | VV   | 0.1363      | 6742.84961   | 777.97626    | 48.0208 |
| 2      | 7.435         | VV   | 0.1646      | 7298.66943   | 692.54535    | 51.9792 |

Enantiomeric excess of **13** (Chiracel IB column, 99:1 hexanes:isopropanol, 1 mL/min, 225nm)

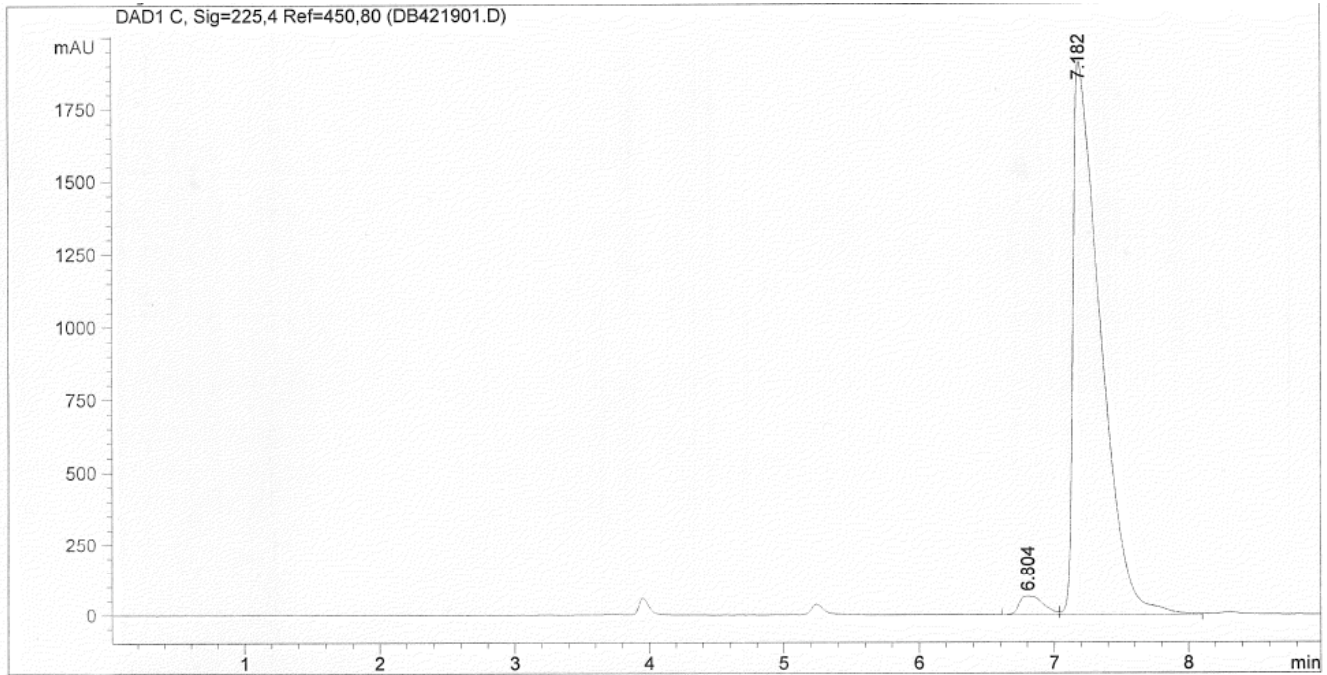

=====  
Area Percent Report  
=====

Sorted By : Signal  
Multiplier : 1.0000  
Dilution : 1.0000  
Use Multiplier & Dilution Factor with ISTDs

Signal 1: DAD1 C, Sig=225,4 Ref=450,80

| Peak # | RetTime [min] | Type | Width [min] | Area [mAU*s] | Height [mAU] | Area %  |
|--------|---------------|------|-------------|--------------|--------------|---------|
| 1      | 6.804         | VV   | 0.1724      | 809.45288    | 65.00059     | 2.9136  |
| 2      | 7.182         | VV   | 0.1933      | 2.69728e4    | 1913.40662   | 97.0864 |

$^1\text{H}$  NMR spectrum of **14** (400 MHz,  $\text{CDCl}_3$ )

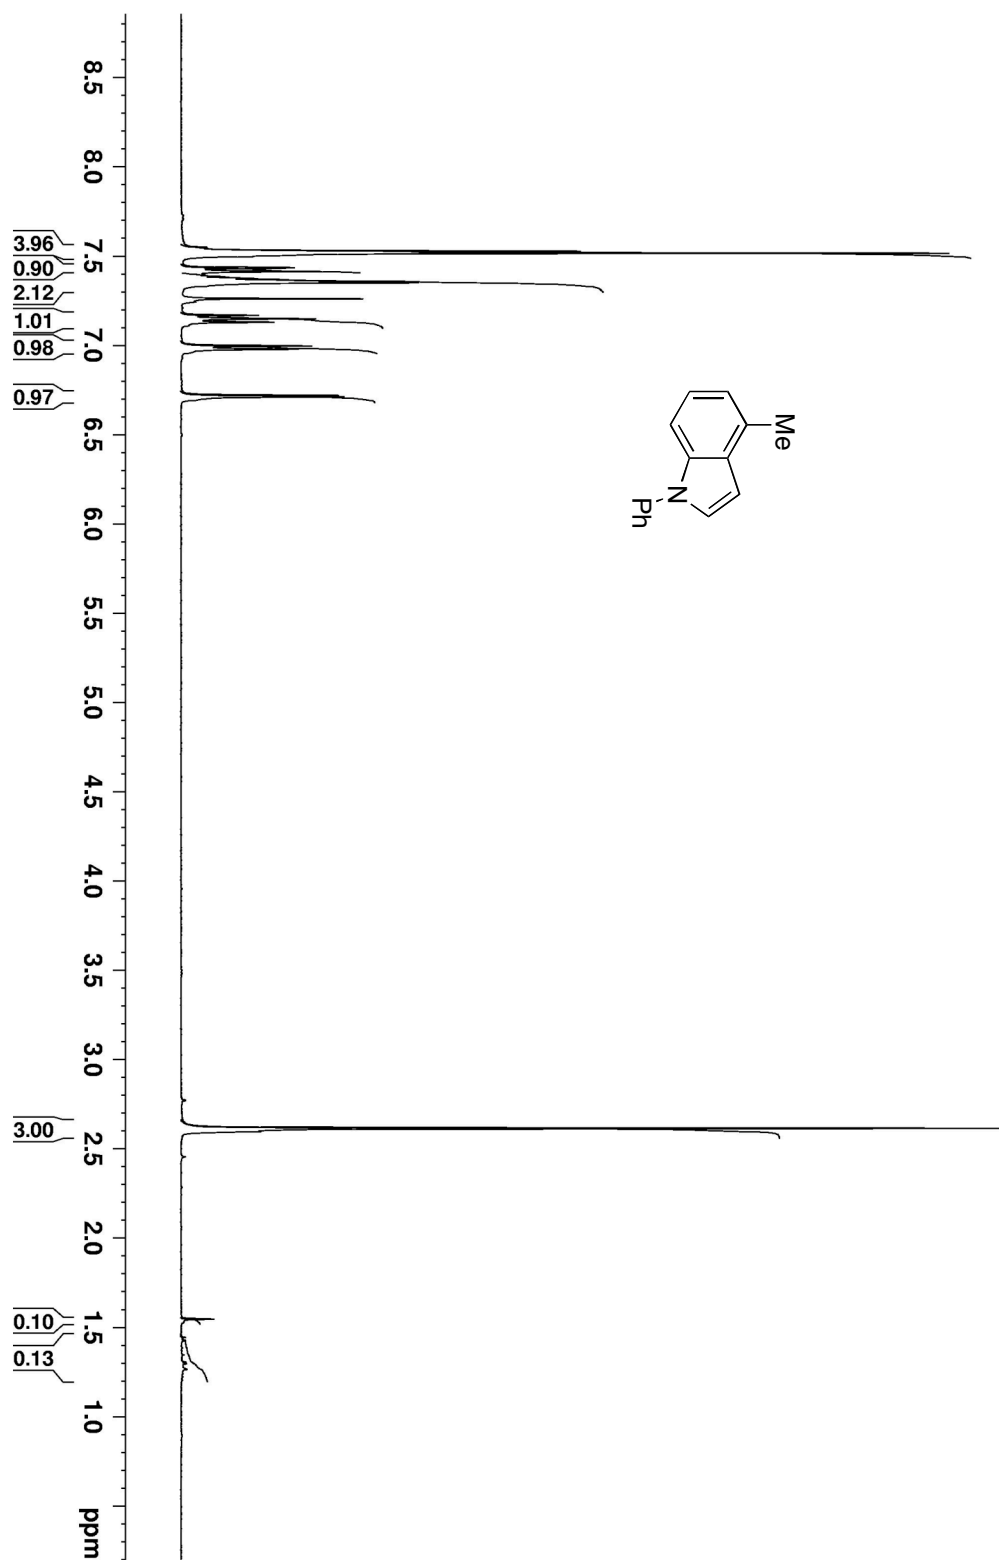



$^{13}\text{C}$  NMR spectrum of **14** (100 MHz,  $\text{CDCl}_3$ )

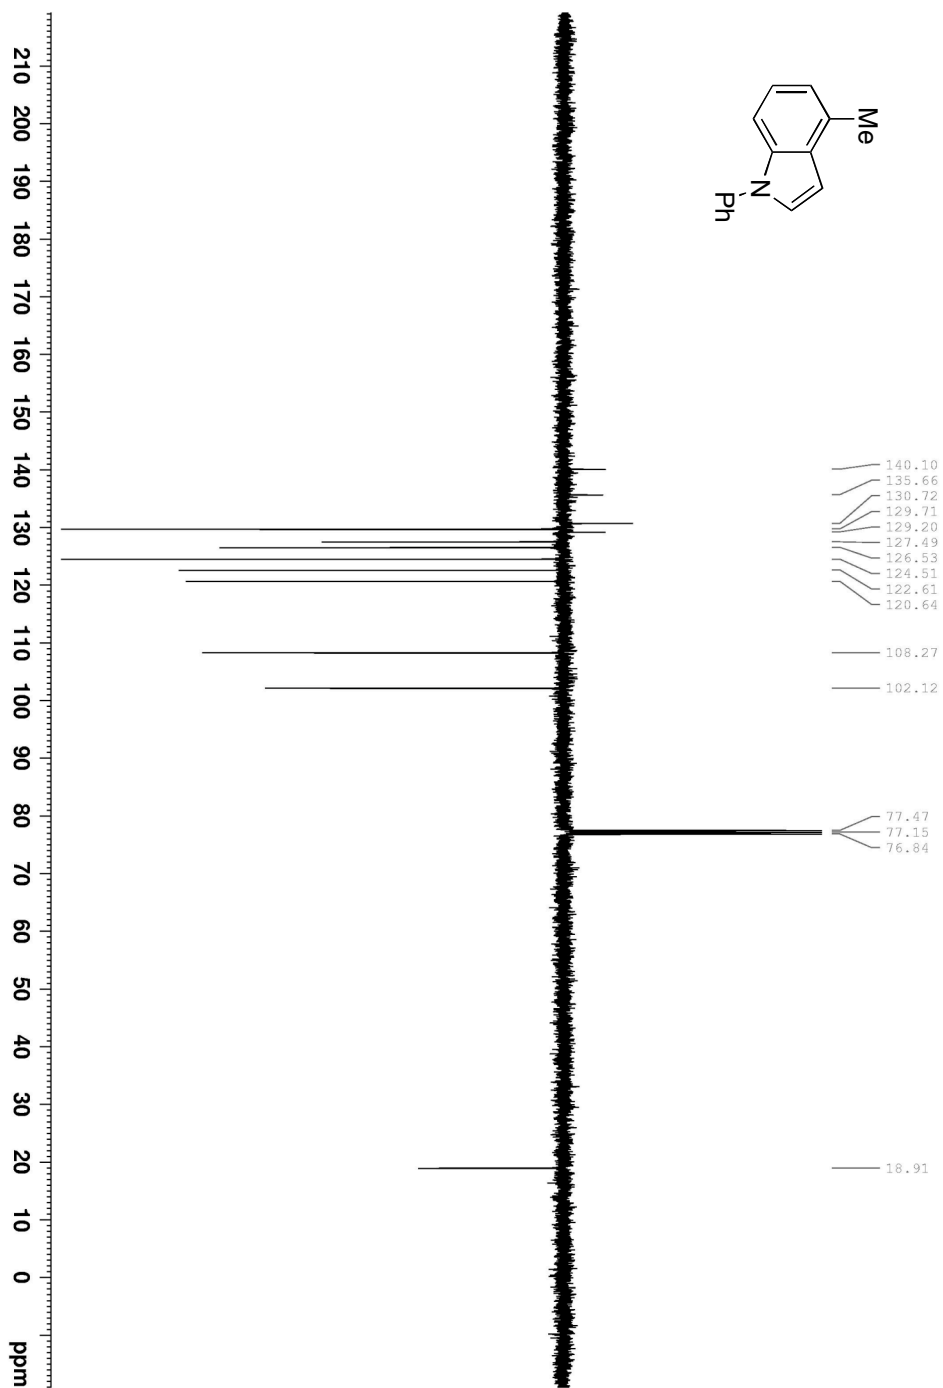

$^1\text{H}$  NMR spectrum of **15** (400 MHz,  $\text{C}_6\text{D}_6$ )

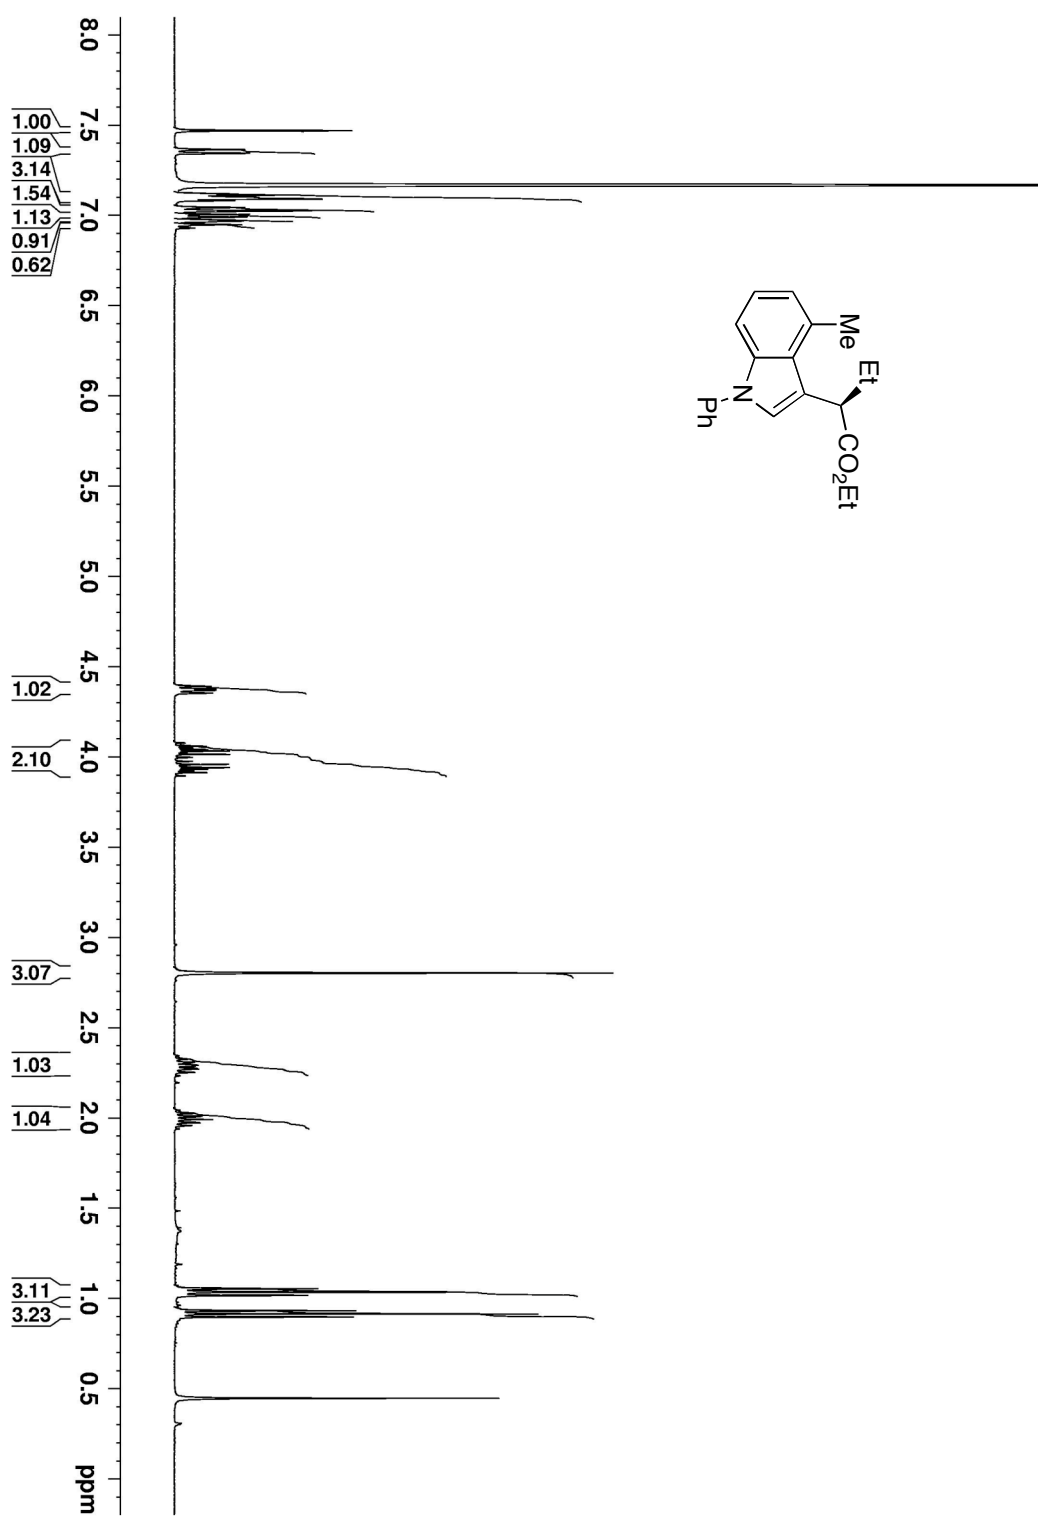

$^{13}\text{C}$  NMR spectrum of **15** (100 MHz,  $\text{C}_6\text{D}_6$ )

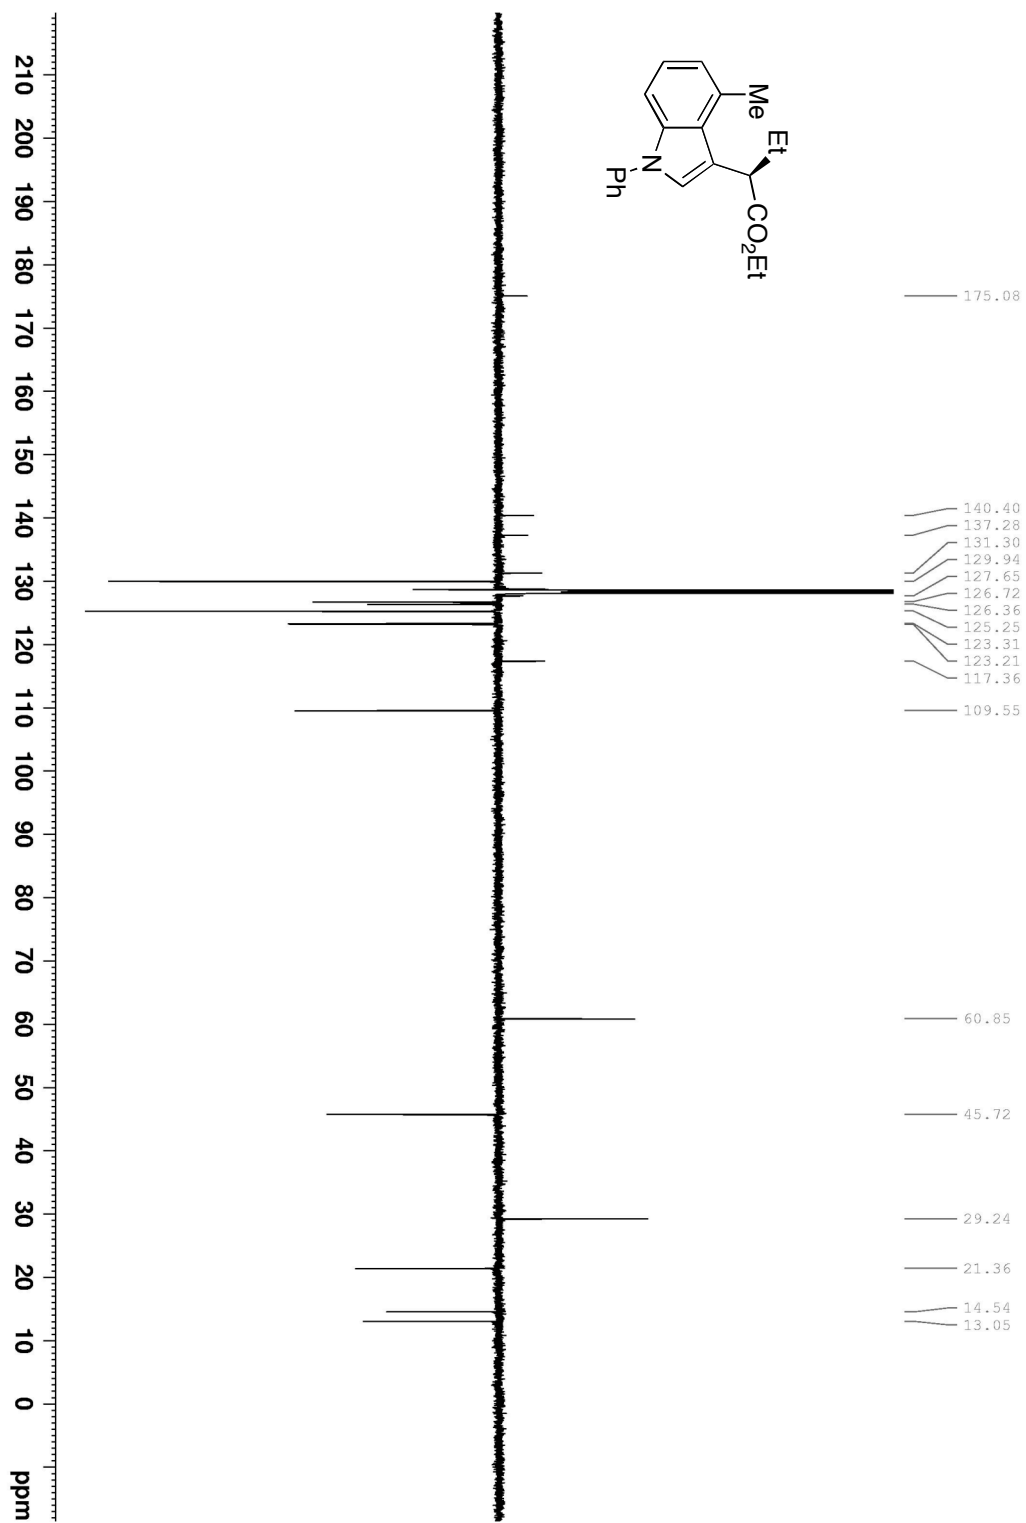

HPLC resolution of racemic **15** (Chiracel IB column, 99:1 hexanes:isopropanol, 1 mL/min, 254 nm)

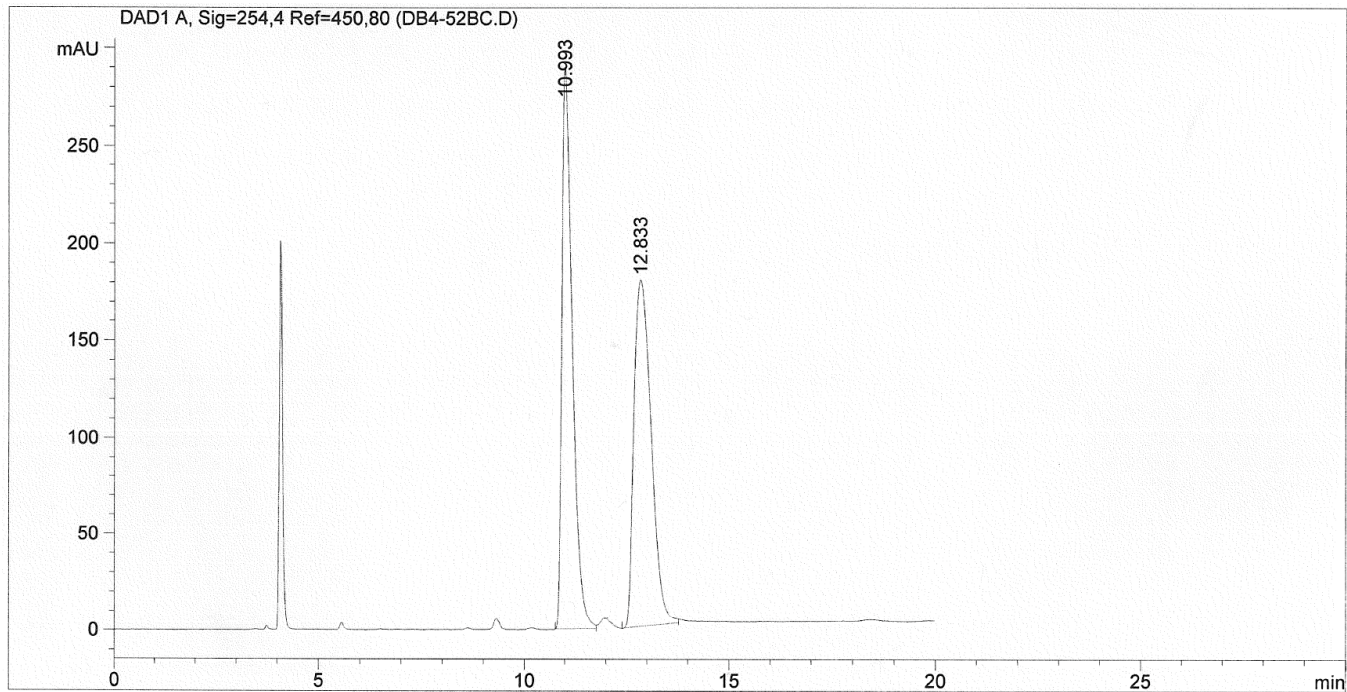

=====  
 Area Percent Report  
 =====

Sorted By : Signal  
 Multiplier : 1.0000  
 Dilution : 1.0000  
 Use Multiplier & Dilution Factor with ISTDs

Signal 1: DAD1 A, Sig=254,4 Ref=450,80

| Peak # | RetTime [min] | Type | Width [min] | Area [mAU*s] | Height [mAU] | Area %  |
|--------|---------------|------|-------------|--------------|--------------|---------|
| 1      | 10.993        | PV   | 0.2676      | 5127.26123   | 289.21527    | 49.3078 |
| 2      | 12.833        | VB   | 0.4551      | 5271.21533   | 179.24860    | 50.6922 |

Totals : 1.03985e4 468.46387



Enantiomeric excess of **15** (Chiracel IB column, 99:1 hexanes:isopropanol, 1 mL/min, 254nm)

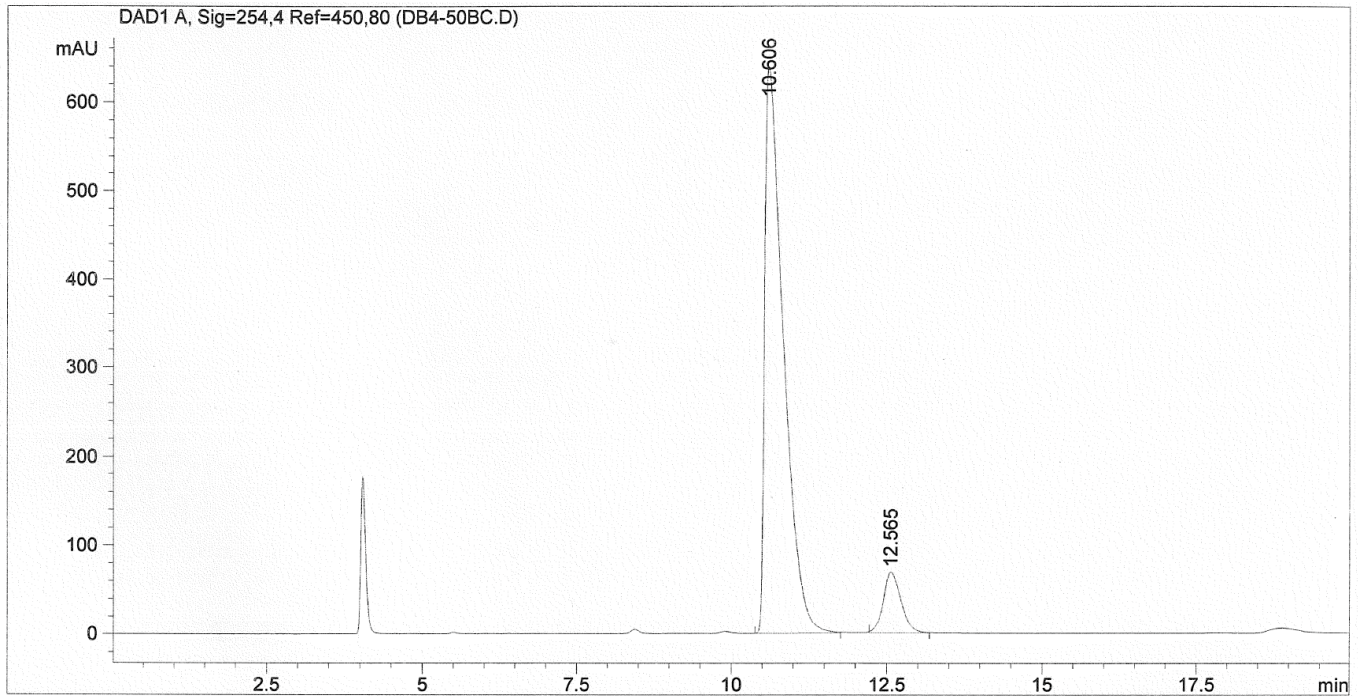

=====  
Area Percent Report  
=====

Sorted By : Signal  
Multiplier : 1.0000  
Dilution : 1.0000  
Use Multiplier & Dilution Factor with ISTDs

Signal 1: DAD1 A, Sig=254,4 Ref=450,80

| Peak # | RetTime [min] | Type | Width [min] | Area [mAU*s] | Height [mAU] | Area %  |
|--------|---------------|------|-------------|--------------|--------------|---------|
| 1      | 10.606        | BB   | 0.2987      | 1.33472e4    | 637.49329    | 90.6329 |
| 2      | 12.565        | BB   | 0.3072      | 1379.45874   | 68.88647     | 9.3671  |

Totals : 1.47266e4 706.37976

$^1\text{H}$  NMR spectrum of  $\text{Rh}_2(\text{S-PTTL})_2(\text{TPA})_2$  + ethyl acetate adduct (400 MHz,  $\text{CD}_3\text{CN}$ )

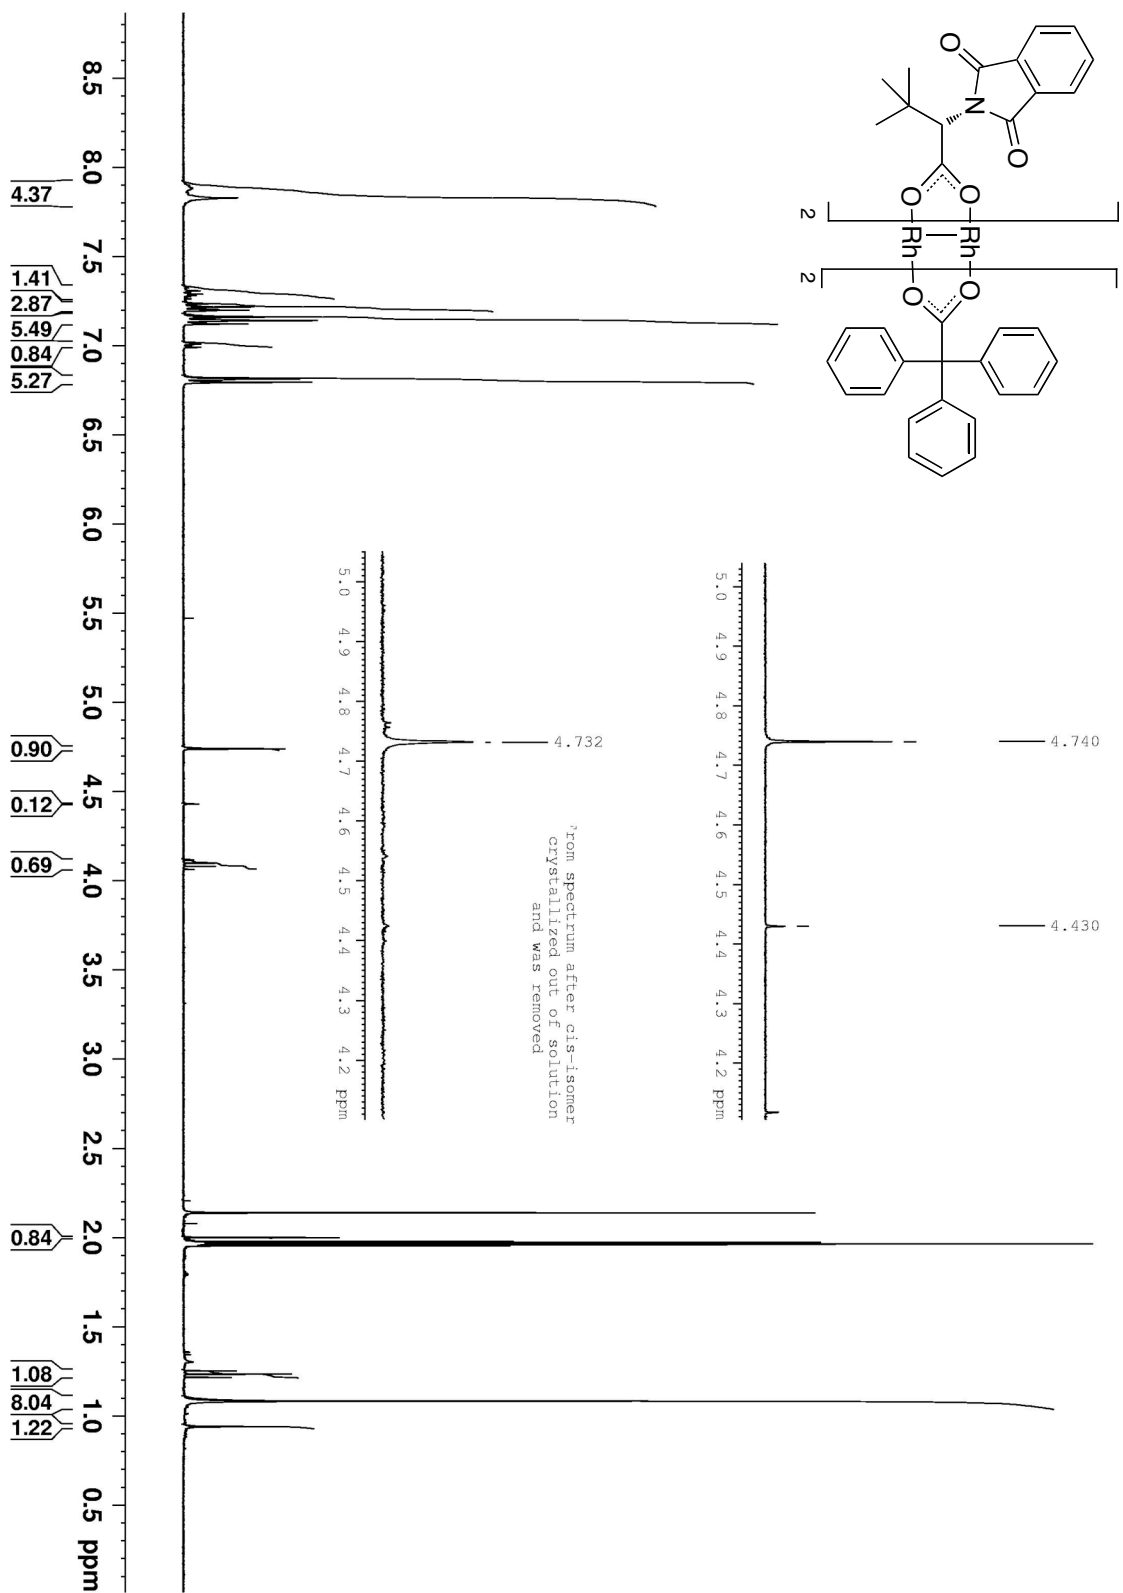

$^{13}\text{C}$  NMR spectrum of  $\text{Rh}_2(\text{S-PTTL})_2(\text{TPA})_2$  (100 MHz,  $\text{CD}_3\text{CN}$ )

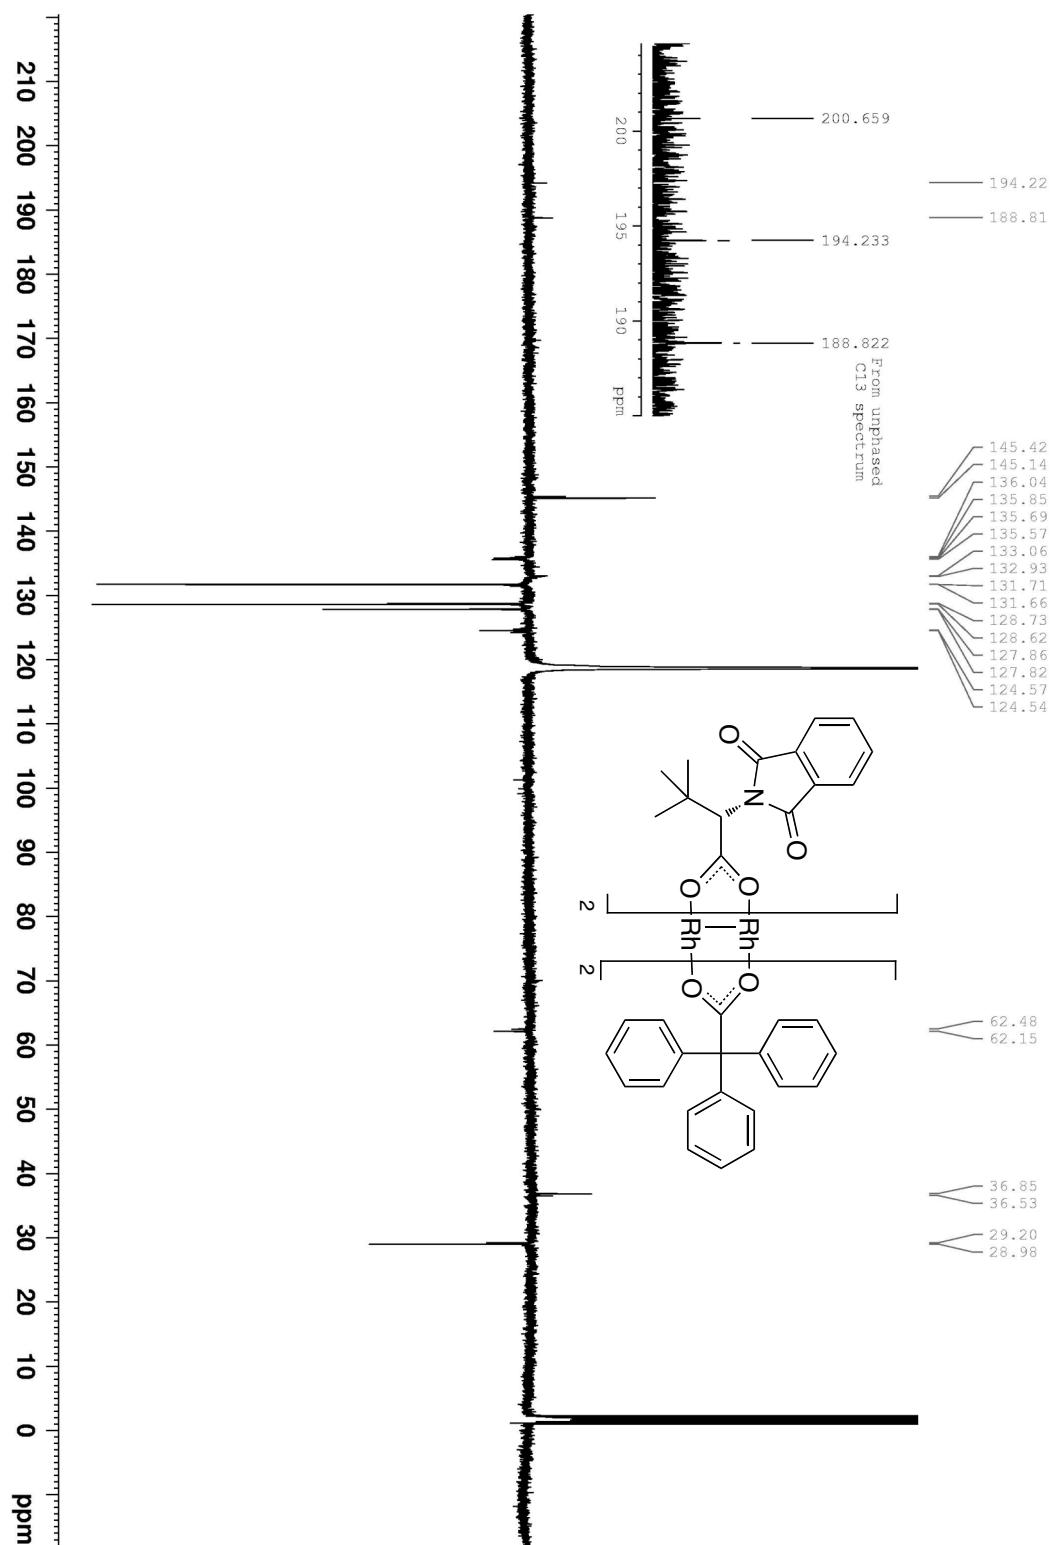

Supplement: NIHMS390009-supplement-spectral_si.pdf [file NIHMS390009-supplement-spectral_si.pdf]
